# Supplementary material
Source: PubMed Central journal article supplement (PMC3163953)
Supplement: JCI45790sd.pdf [file JCI45790sd.pdf]

Supplemental Figure 1

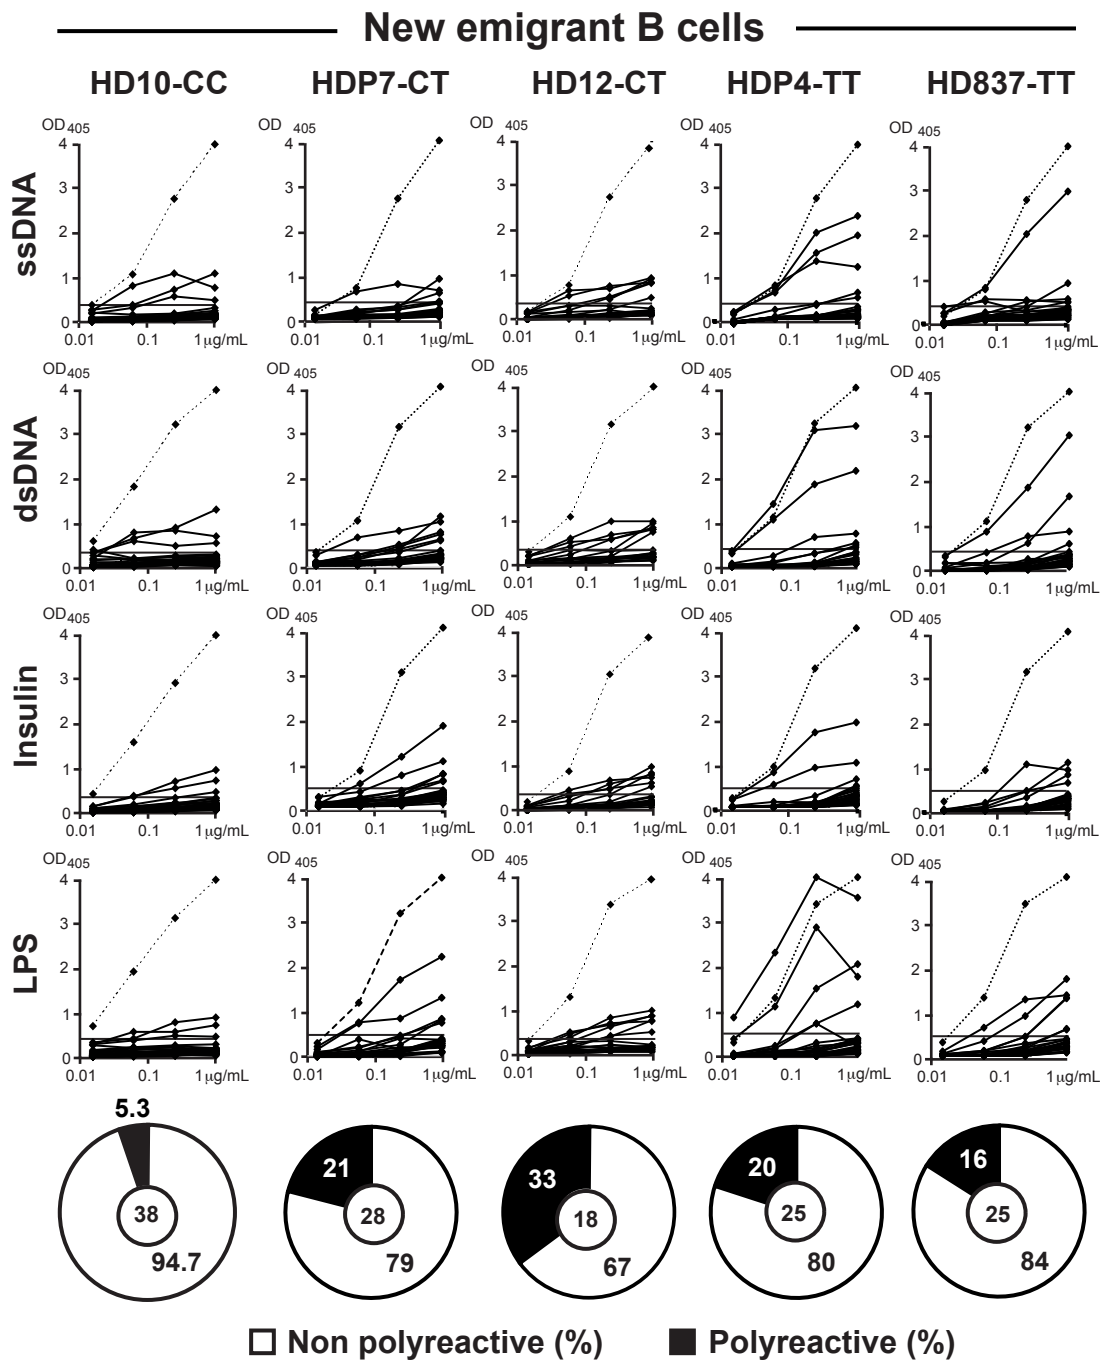

**Supplemental Figure 1.** Altered central B cell tolerance checkpoint in healthy individuals carrying *PTPN22* risk allele(s). Antibodies from mature naïve B cells from non-carrier (CC) and carrier (CT or TT) healthy donors were tested by ELISA for reactivity with single-stranded DNA (ssDNA), double-stranded DNA (dsDNA), insulin and lipopolysaccharide (LPS). Dotted lines show ED38-positive control. Horizontal lines show cut-off OD405 for positive reactivity. For each individual, the frequency of polyreactive (in black) and non polyreactive (in white) clones is summarized in pie-charts with the number of antibodies tested indicated in the centers.

## Supplemental Figure 2

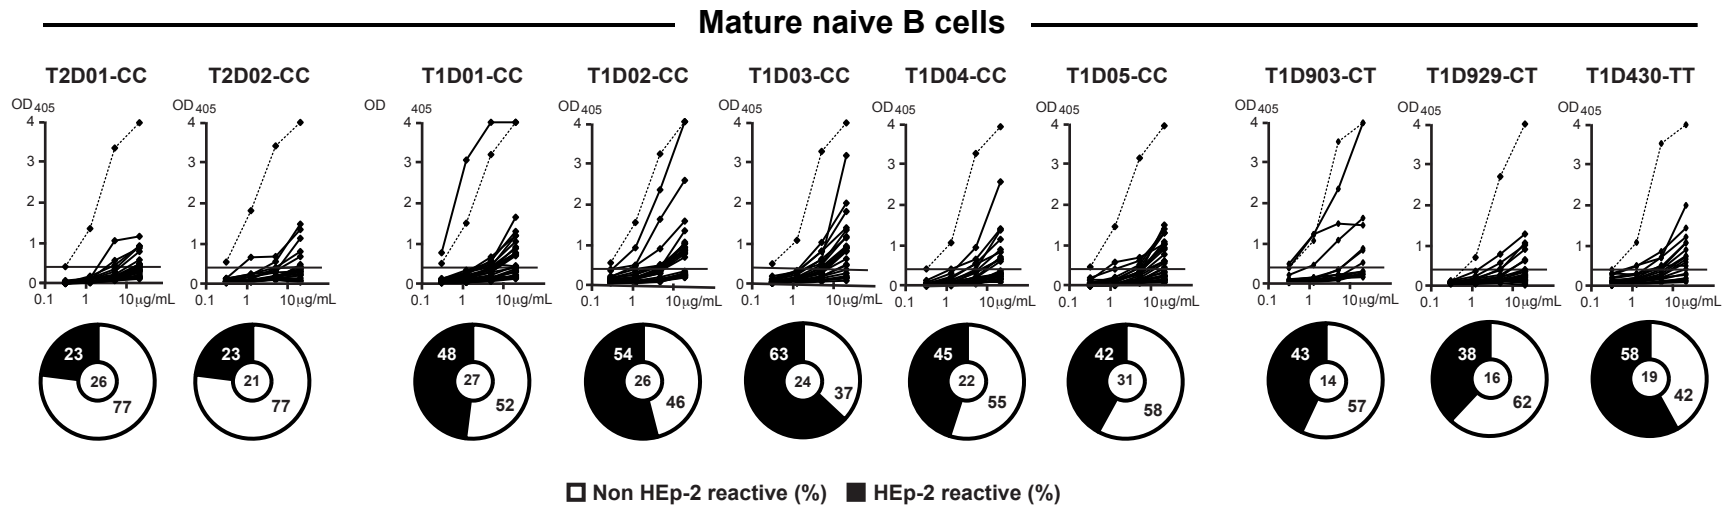

**Supplemental Figure 2.** Increased frequencies of HEP-2 reactive mature naïve B cells in T1D patients. Antibodies from mature naïve B cells from non-carrier T2D and T1D (CC) and carrier (CT or TT) T1D patients were tested by ELISA for HEP-2 reactivity. Dotted lines show ED38-positive control. Horizontal lines show cut-off OD405 for positive reactivity. For each individual, the frequency of HEP-2 reactive (in black) and non HEP-2 reactive (in white) clones is summarized in pie-charts with the number of antibodies tested indicated in the centers.

## Mature naive B cells

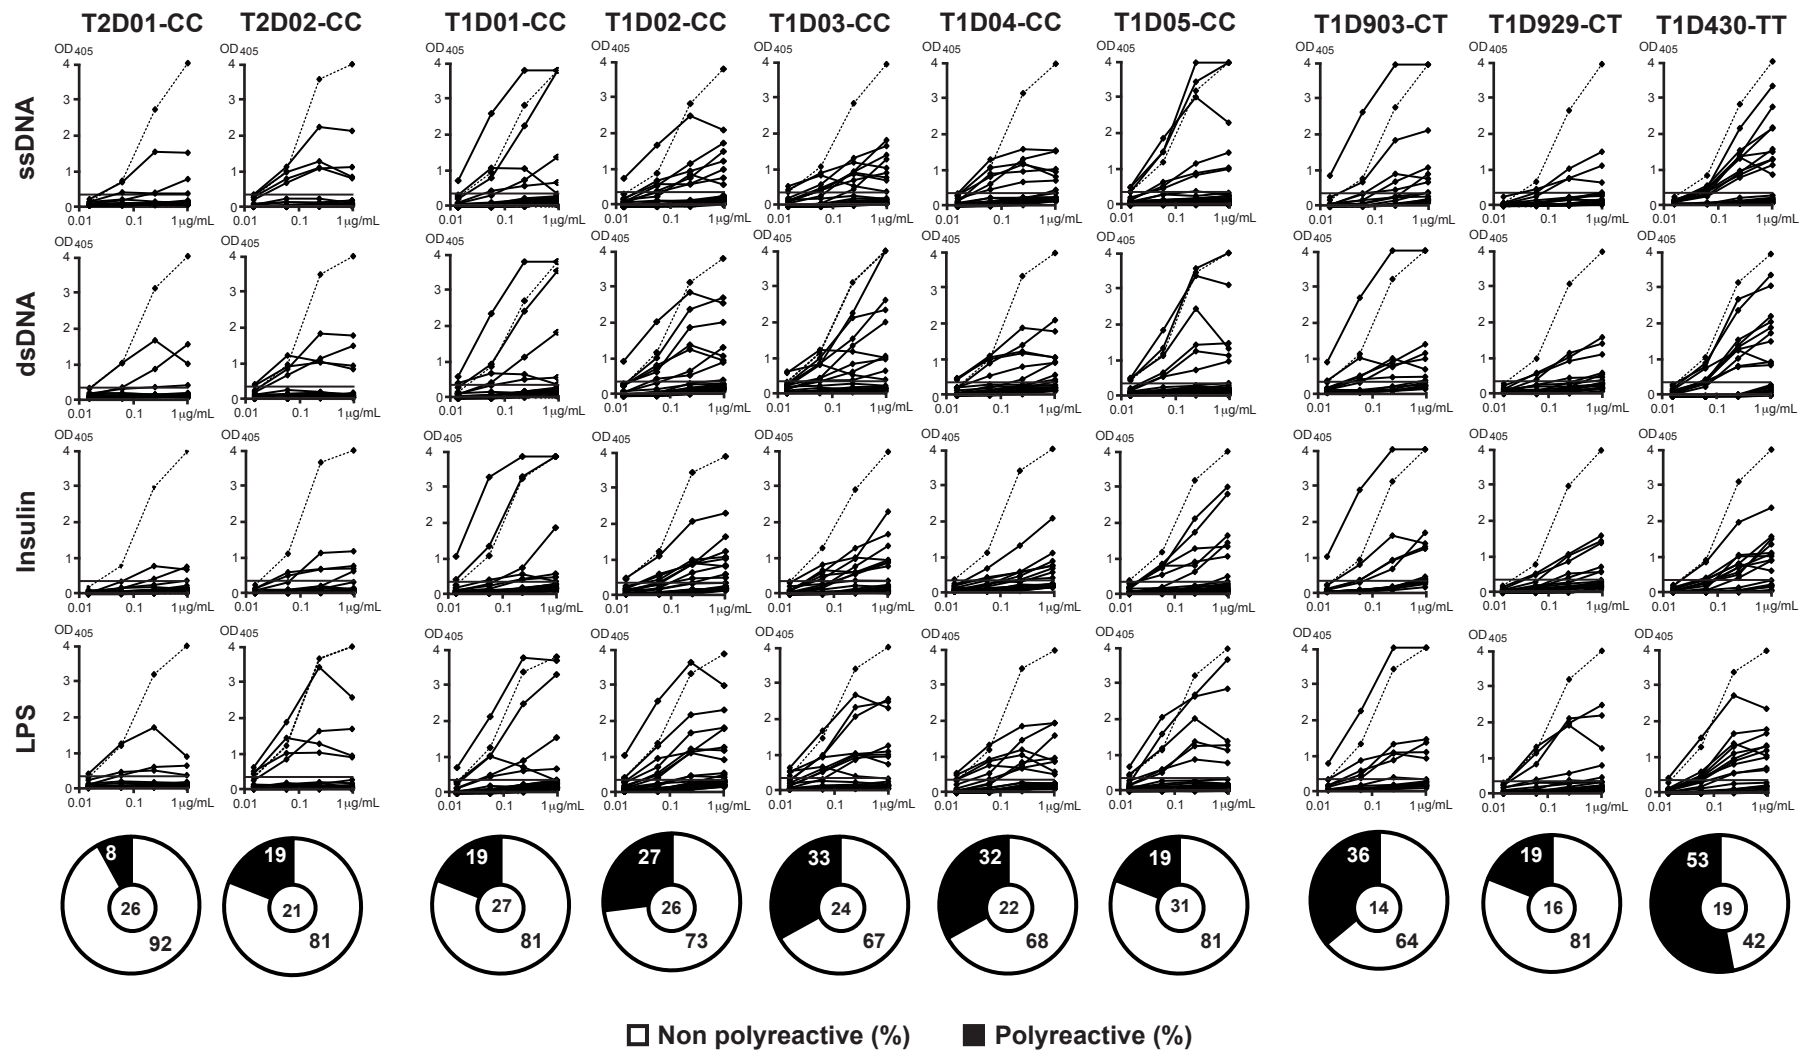

**Supplemental Figure 3.** Increased frequencies of polyreactive mature naive B cells in T1D patients. Antibodies from mature naive B cells from non-carrier T2D and T1D (CC) and carrier (CT or TT) T1D patients were tested by ELISA for reactivity with single-stranded DNA (ssDNA), double-stranded DNA (dsDNA), insulin and lipopolysaccharide (LPS). Dotted lines show ED38-positive control. Horizontal lines show cut-off OD<sub>405</sub> for positive reactivity. For each individual, the frequency of polyreactive (in black) and non polyreactive (in white) clones is summarized in pie-charts with the number of antibodies tested indicated in the centers.

### Supplemental Figure 4

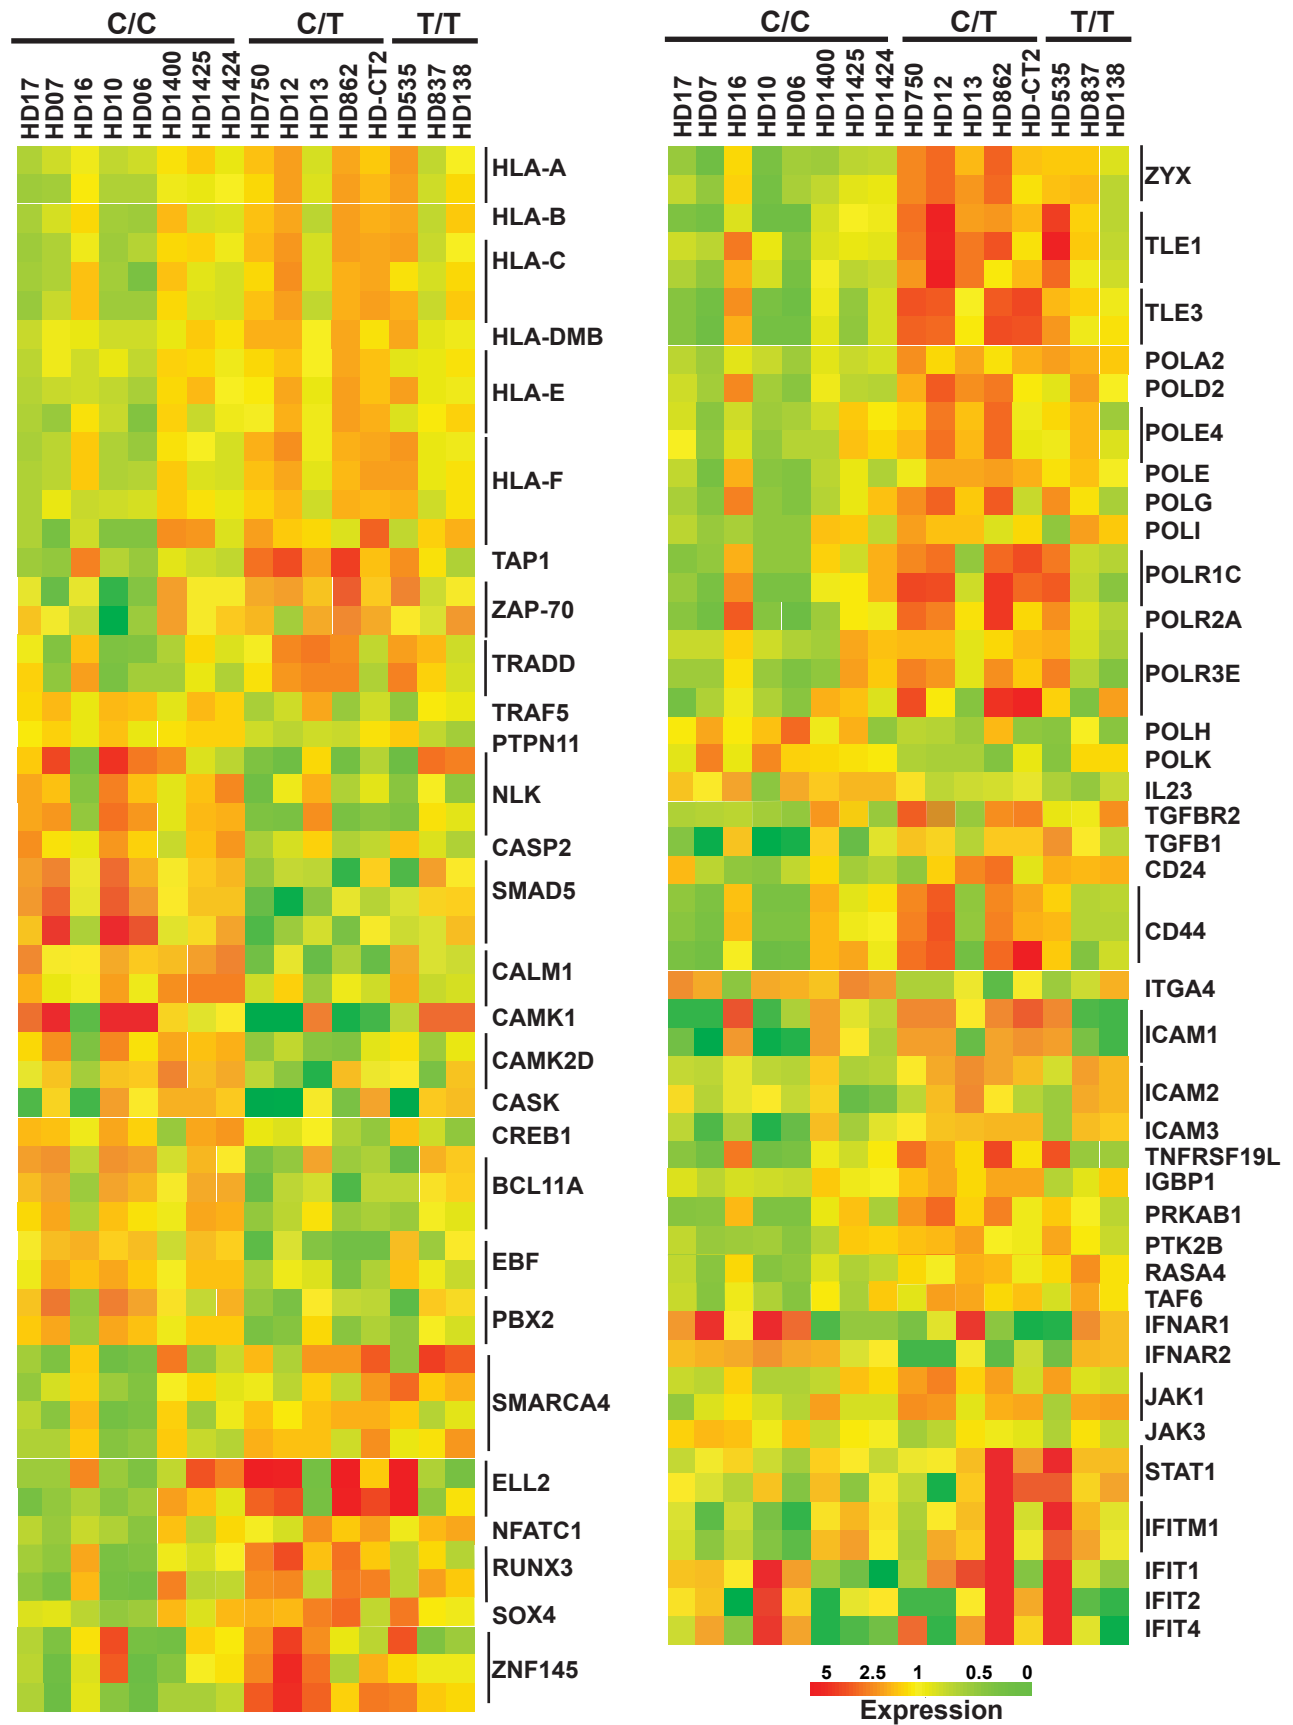

**Supplemental Figure 4.** Gene array comparisons of mature naive B cells from healthy donors carrying or not *PTPN22* risk allele(s) using the Affimetrix Human Genome U133 Plus 2.0 Array. Up- and down-regulated transcripts are indicated in red and green, respectively. The magnitude of expression is depicted by the color bar. One or more probes are shown for each gene.

## Supplemental Figure 5

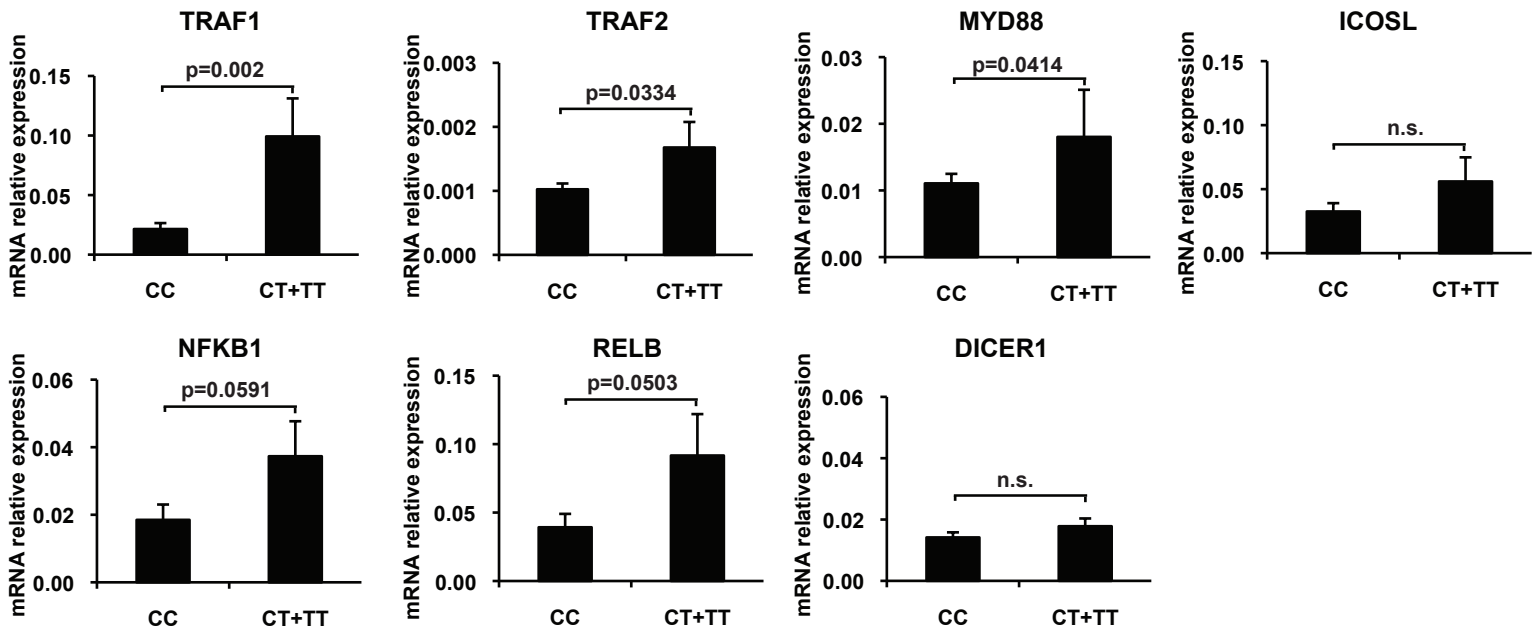

**Supplemental Figure 5.** Mature naïve B cells from healthy donors carrying *PTPN22* risk allele(s) display an increased transcription of genes identified in gene array profiling data. Gene expression was assessed by quantitative real-time PCR comparing 31 non-carrier healthy donors and 16 individuals carrying *PTPN22* risk allele(s). Data are expressed as mean  $\pm$  s.e.m., p-values are indicated, n.s.: non significant.

## Supplemental Figure 6

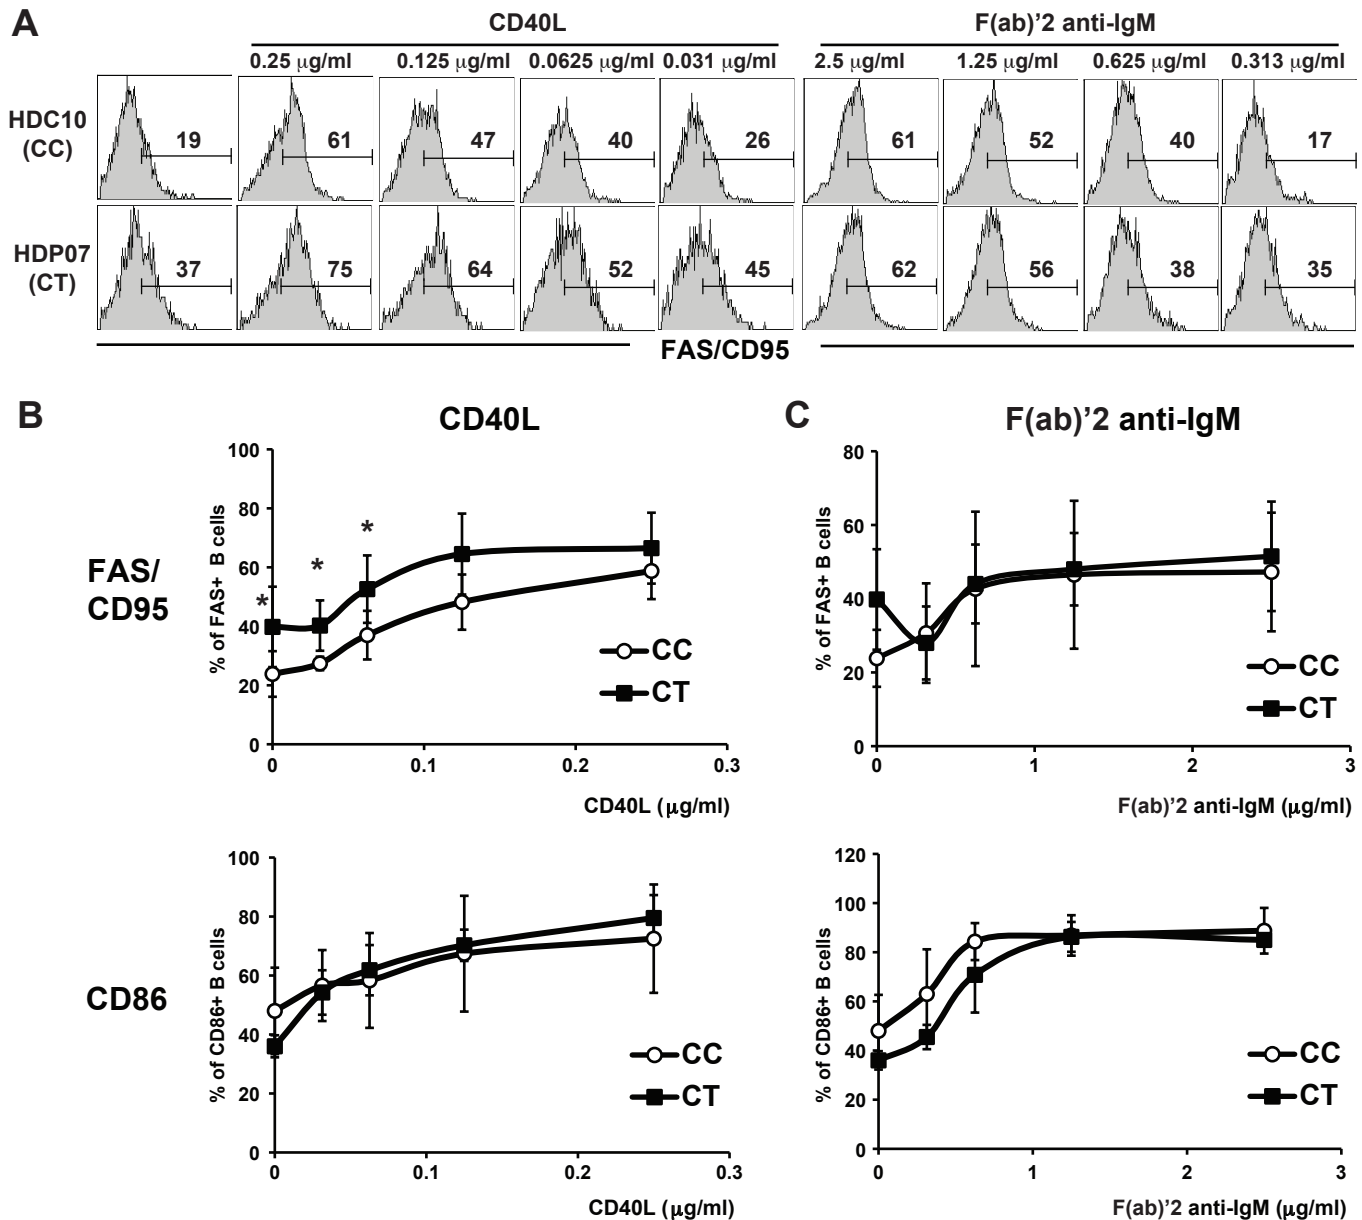

**Supplemental Figure 6.** Enhanced CD40 responses in naïve B cells from *PTPN22* risk allele carriers. Representative histograms (A) and combined average expression (B) of FAS/CD95 and CD86 on naïve B cells from healthy donors carrying or not the *PTPN22* risk allele are shown after stimulation in vitro with various indicated concentrations of multimeric soluble recombinant CD40L (left) or F(ab)'2 anti-IgM (right) for 2 days. Data are representative of four independent experiments and statistical significances are indicated (\* $p < 0.05$ ).

**Supplemental Table 1** Repertoire and reactivity of antibodies from new emigrant B cells of healthy donor 750

| Ig          | HEAVY |      |    |    |                         | LIGHT  |       |    |             |        | REACTIVITY |       |          |
|-------------|-------|------|----|----|-------------------------|--------|-------|----|-------------|--------|------------|-------|----------|
|             | VH    | D    | RF | JH | CDR3 (aa)               | Length | Vκ    | Jκ | CDR3 (aa)   | Length | Poly       | HEp-2 | Staining |
| neHD750 04  | 4-31  | 2-2  | 2  | 5  | GYCSSTSCNQGGNWFDP       | 17     | 4-1   | 4  | QQYYSTPLT   | 9      | -          | +     | -        |
| neHD750 05  | 3-23  | 4-23 | 2  | 4  | EGDYGGNSLFGGEDY         | 15     | 3-11  | 4  | QQRSNWLT    | 8      | -          | +     | -        |
| neHD750 06  | 4-4   | 4-4  | 3  | 5  | DIVMSQDMTTVTTFWFDP      | 18     | 3-15  | 1  | QQYNNWPQT   | 9      | -          | +     | -        |
| neHD750 09# | 3-23  | 6-19 | 1  | 6  | DRQWLVSEPSARPPWEDWDGMDV | 23     | 2-30  | 2  | MQGTHWPQRT  | 10     |            |       |          |
| neHD750 12  | 3-7   | 3-22 | 2  | 3  | HEAIGYYDSSGYYYDAFDI     | 19     | 4-1   | 4  | QQYYSTPLT   | 9      | -          | -     | -        |
| neHD750 14κ | 4-4   | /    | /  | 2  | DDEYWYFDL               | 9      | 3-20  | 2  | QQYGSSLMYT  | 10     | -          | +     | -        |
| neHD750 15  | 1-18  | 5-24 | 3  | 6  | EGMATQTADYYYYYGMVDV     | 18     | 3-20  | 4  | QQYGSSPLT   | 9      | -          | -     | -        |
| neHD750 16  | 3-7   | 3-22 | 2  | 4  | YSYYDSRCNFDY            | 13     | 1-33  | 4  | QQYDNLPLT   | 10     | +          | +2    | -        |
| neHD750 17  | 3-15  | 3-10 | 3  | 4  | DPLITMVRGVIH            | 12     | 1D-13 | 3  | QQFNNYPLT   | 9      | +          | +     | -        |
| neHD750 18  | 3-48  | 3-3  | 2  | 4  | DSDFWSGWFDY             | 11     | 3-15  | 4  | QQYNNWPPLT  | 10     | -          | -     | -        |
| neHD750 21  | 4-39  | 4-17 | 2  | 3  | LIDVWRYGDYDHDAFDI       | 17     | 3-11  | 4  | QQRSNWPLT   | 9      | -          | -     | -        |
| neHD750 22# | 3-23  | 6-6  | 2  | 3  | EYSSSSGYGDAFDI          | 14     | 1-39  | 5  | QQSYSTPLT   | 9      |            |       |          |
| neHD750 24  | 4-59  | 2-2  | 2  | 4  | LHCSSTSCYESMYDY         | 15     | 1-39  | 3  | QQSYSTPFT   | 9      |            | +     | N        |
| neHD750 25# | 1-69  | 6-13 | 3  | 5  | DPPEAAAGTEVRDFNPGWFDP   | 21     | 1-27  | 5  | QKYNAPET    | 9      |            |       |          |
| neHD750 27  | 3-15  | 6-6  | 3  | 4  | GIAARPGY                | 8      | 1-39  | 2  | QQSYSTPMYT  | 10     | +2         | +2    | -        |
| neHD750 28  | 3-66  | 4-23 | 2  | 4  | DRRYGGNSVGDFDY          | 14     | 1-39  | 2  | QQSYSTPYT   | 9      | -          | -     | -        |
| neHD750 30  | 3-7   | 3-22 | 2  | 4  | DLTYYYDSSGPNPYFFDY      | 18     | 3-11  | 4  | QQRSNWPLT   | 9      | -          | -     | -        |
| neHD750 32  | 3-48  | 5-12 | 3  | 6  | DTHIVATYYYGMVDV         | 14     | 1-33  | 3  | QQYDNLPT    | 9      | +          | +     | -        |
| neHD750 36# | 3-74  | 3-3  | 2  | 6  | NYDFWSGYYYYYGMVDV       | 16     | 3-20  | 2  | QQYGSSPPYT  | 10     |            |       |          |
| neHD750 37  | 3-9   | 5-5  | 1  | 4  | GAQGIQLWFFNY            | 12     | 1-5   | 2  | QQYNSYSRYT  | 10     | +          | +2    | -        |
| neHD750 41  | 4-34  | /    | /  | 5  | GPGSPRLNWFDP            | 12     | 3-11  | 2  | QQRSNWPPRYT | 11     | +          | +     | N        |
|             | VH    | D    | RF | JH | CDR3 (aa)               | Length | Vλ    | Jλ | CDR3 (aa)   | Length | Poly       | HEp-2 | Staining |
| neHD750 03# | 1-2   | 3-22 | 2  | 4  | VMGPINYDSSGYLNY         | 15     | 2-23  | 2  | CSYAGSSVV   | 9      |            |       |          |
| neHD750 07  | 1-2   | 2-8  | 2  | 4  | LGRADCTNGVCYDY          | 14     | 2-14  | 2  | SSYTSSSTVV  | 10     | -          | -     | -        |
| neHD750 10  | 3-11  | 5-5  | 2  | 6  | DKGGYSYGSAYYYGMVDV      | 17     | 1-51  | 2  | GTWDSSLSAGV | 11     | -          | -     | -        |
| neHD750 14λ |       |      |    |    | see kappa               |        | 2-8   | 1  | SSYAGSNKLGV | 11     | -          | +     | -        |
| neHD750 23  | 1-2   | 6-13 | 1  | 4  | RDEQQLVAGYYMGY          | 14     | 3-25  | 2  | QSADSSGTYVV | 11     | -          | -     | -        |
| neHD750 26# | 3-23  | 1-26 | 1  | 3  | GPEWELPRHAFDI           | 13     | 3-21  | 7  | QVWDSSSDHAV | 11     |            |       |          |
| neHD750 38  | 3-23  | 2-15 | 3  | 4  | VADIVVVVAAPPHY          | 14     | 3-1   | 1  | QAWDSNNYV   | 9      | +          | +2    | -        |
|             | VH    | D    | RF | JH | CDR3 (aa)               | Length |       |    |             |        |            |       |          |
| neHD750 33  | 3-9   | 3-3  | 2  | 6  | DKGFWSGYARVAYYYYGMVDV   | 20     |       |    |             |        |            |       |          |

RF, reading frame; #, antibody failed to be expressed

-, non-reactive; +, reactive; +2, highly reactive

c, diffuse cytoplasmic staining; A, actin staining; G, Golgi staining; M, mitochondria staining; MS, mitotic spindle staining; N, nuclear staining; F, cytoplasmic fibers

**Supplemental Table 2** Repertoire and reactivity of antibodies from new emigrant B cells of healthy donor 12

| Ig         | HEAVY |      |    |    |                          |        | LIGHT |    |                |        | REACTIVITY |       |          |
|------------|-------|------|----|----|--------------------------|--------|-------|----|----------------|--------|------------|-------|----------|
|            | VH    | D    | RF | JH | CDR3 (aa)                | Length | Vκ    | Jκ | CDR3 (aa)      | Length | Poly       | HEp-2 | Staining |
| neHD12 17# | 3-7   | /    | /  | 4  | VGGAWLPEYFDY             | 12     | 3-15  | 1  | QQYNNWPPWT     | 10     |            |       |          |
| neHD12 23# | 3-7   | 3-9  | 2  | 6  | DKDIWVDV                 | 7      | 1-33  | 2  | QQYDNLPLYT     | 9      |            |       |          |
| neHD12 33  | 3-33  | 3-10 | 3  | 6  | EAGVVRGVIHFYYMDV         | 18     | 1-9   | 4  | QQLNSYPLT      | 9      | +          | +2    | -        |
| neHD12 44  | 3-23  | 3-22 | 2  | 4  | DEVYYYDSSGYYGKRGTFDY     | 21     | 3-15  | 1  | QQYNNWPPWT     | 10     | -          | +     | -        |
| neHD12 45  | 3-23  | 2-2  | 2  | 6  | KTYCSSTSCYFVQEIGYGMDV    | 21     | 1-39  | 1  | QQSYPTRA       | 9      | +          | +2    | -        |
| neHD12 47  | 4-39  | 7-27 | 2  | 3  | WGDAFDI                  | 7      | 1-6   | 1  | LQDYNPRT       | 9      | +          | +2    | -        |
| neHD12 54  | 4-59  | 3-22 | 2  | 1  | GGKYYDSSGYPRALQH         | 18     | 2-28  | 1  | MQALQTAT       | 8      | -          | +     | -        |
| neHD12 58  | 1-8   | 6-6  | 2  | 4  | ALGYSSSSG                | 9      | 1-17  | 1  | LQHNSYPQT      | 9      | -          | +     | -        |
| neHD12 59# | 3-23  | 3-9  | 1  | 6  | KVLRDWPDPAPYYYYGMDV      | 21     | 1-39  | 4  | QQSYPSTLT      | 9      |            |       |          |
| neHD12 60  | 3-23  | /    | /  | 4  | GVTRYFDY                 | 8      | 3-11  | 2  | QQRSNWYT       | 8      | +          | -     | -        |
| neHD12 65# | 7-4-1 | /    | /  | 4  | DLRGPEGLDY               | 10     | 1-5   | 1  | QQYNSYWT       | 8      |            |       |          |
| neHD12 66  | 3-20  | 6-13 | 2  | 5  | DLYSSWSLWDFDP            | 14     | 3-15  | 4  | QQYNNWSSA      | 9      | -          | +     | -        |
| neHD12 67# | 1-24  | 2-15 | 3  | 3  | TLVVGIAKWELRNDAFDI       | 18     | 1-5   | 2  | QQYNSYSQYT     | 10     |            |       |          |
|            |       | 1-26 | 1  |    |                          |        |       |    |                |        |            |       |          |
| neHD12 69  | 4-59  | /    | /  | 6  | ESAGMDV                  | 7      | 3-11  | 2  | QQRSNWPPYT     | 10     | -          | +     | -        |
| neHD12 70  | 3-9   | 3-22 | 2  | 3  | TSGNYDSSGYSTDAFDI        | 19     | 1-17  | 1  | LQHNSYPWT      | 9      | -          | -     | -        |
| neHD12 72# | 3-66  | /    | /  | 6  | RTSYYYYGMDV              | 11     | 1-33  | 3  | QQYDNLGTT      | 9      |            |       |          |
| neHD12 79# | 4-59  | 6-19 | 2  | 4  | LVLGSSGWYLDY             | 13     | 1-5   | 1  | QQSLT          | 5      |            |       |          |
| neHD12 87  | 3-15  | /    | /  | 4  | NEPAIDY                  | 7      | 2-28  | 4  | MQALQTPLT      | 9      | -          | -     | -        |
| neHD12 90  | 4-59  | 3-16 | 2  | 4  | WGGDYVWGSYRYFDY          | 15     | 1-39  | 2  | QQSYPSTLYT     | 9      | +          | +     | -        |
| neHD12 93  | 1-46  | 3-3  | 3  | 5  | DGITIFGVVNGPEFDP         | 16     | 1-39  | 2  | QQSYPSTPPT     | 9      | -          | +     | -        |
| neHD12 96# | 3-33  | 3-3  | 3  | 6  | VPDITIFGVVTTTKYYYGMDV    | 21     | 1-16  | 5  | QQYNSYP        | 7      |            |       |          |
| neHD12 68  |       |      |    |    |                          |        | 3-11  | 4  | QQRSNWPPLT     | 10     |            |       |          |
| neHD12 83  |       |      |    |    |                          |        | 2-28  | 4  | MQALQTPLT      | 9      |            |       |          |
| neHD12 91  |       |      |    |    |                          |        | 1-39  | 1  | QQSYPSTPS      | 8      |            |       |          |
|            | VH    | D    | RF | JH | CDR3 (aa)                | Length | Vλ    | Jλ | CDR3 (aa)      | Length | Poly       | HEp-2 | Staining |
| neHD12 19  | 3-72  | 5-12 | 2  | 6  | EPDSGYDPTYYYYYMDV        | 17     | 3-9   | 2  | QVWDSSSYVV     | 10     | -          | -     | -        |
| neHD12 30  | 1-18  | 3-3  | 2  | 4  | SGWHDFWGSYPLLAYPTEAYYFDY | 25     | 6-57  | 2  | QSYDSSNVV      | 9      | +          | +2    | -        |
| neHD12 41  | 3-15  | 6-13 | 2  | 4  | AWGSSSWYEGGFDY           | 14     | 3-1   | 2  | QAWDSSTVV      | 9      | -          | -     | -        |
| neHD12 42# | 4-59  | 3-22 | 2  | 5  | HGFDDLGPDIYDSSGEAWWDFDP  | 22     | 2-23  | 1  | CSYAGSSTYV     | 10     |            |       |          |
| neHD12 56# | 3-21  | 2-2  | 2  | 6  | DLGRYCSSTSCYTSGMDV       | 18     | 2-23  | 2  | CSYAGSSTYVV    | 11     |            |       |          |
| neHD12 80# | 4-4   | 4-17 | 2  | 2  | DRWDYGDYVWYFDL           | 14     | 2-14  | 1  | SSYTSSTLYV     | 11     |            |       |          |
| neHD12 81  | 4-39  | 3-9  | 2  | 5  | LLDYDPYWFDP              | 11     | 2-11  | 1  | CSYAGSYTWV     | 10     | -          | -     | -        |
| neHD12 88  | 3-48  | 5-12 | 2  | 4  | EGYSYGYDY                | 9      | 1-40  | 2  | QSYDSSLQVV     | 10     | -          | -     | -        |
| neHD12 89# | 1-8   | 3-10 | 2  | 4  | GISNSHVDYGSSEFN          | 16     | 9-49  | 2  | GADHGSGSNFGIVV | 14     |            |       |          |
| neHD12 20  |       |      |    |    |                          |        | 1-44  | 2  | AAWDDSLNGVV    | 11     |            |       |          |
|            | VH    | D    | RF | JH | CDR3 (aa)                | Length |       |    |                |        |            |       |          |
| neHD12 34  | 1-2   | 3-10 | 3  | 2  | GVSRWDYVWYFDL            | 12     |       |    |                |        |            |       |          |
| neHD12 94  | 4-59  | 6-19 | 3  | 5  | RIAVAGTSWDFDP            | 12     |       |    |                |        |            |       |          |

RF, reading frame; #, antibody failed to be expressed

-, non-reactive; +, reactive; +2, highly reactive

c, diffuse cytoplasmic staining; A, actin staining; G, Golgi staining; M, mitochondria staining; MS, mitotic spindle staining; N, nuclear staining; F, cytoplasmic fibers



**Supplemental Table 3** Repertoire and reactivity of antibodies from new emigrant B cells of healthy donor 13

| Ig         | HEAVY  |      |    |    |                           |        | LIGHT |    |              |        |      |       | REACTIVITY |  |  |
|------------|--------|------|----|----|---------------------------|--------|-------|----|--------------|--------|------|-------|------------|--|--|
|            | VH     | D    | RF | JH | CDR3 (aa)                 | Length | Vκ    | Jκ | CDR3 (aa)    | Length | Poly | HEp-2 | Staining   |  |  |
| neHD13 01  | 1-8    | /    | /  | 6  | DSGANWAHEPDDYYGMDV        | 18     | 3-20  | 2  | QQYGRS       | 6      | -    | -     | -          |  |  |
| neHD13 02  | 3-15   | 3-3  | 2  | 6  | GLVRYDFWSGGLPYYYYYYMDV    | 22     | 1-39  | 1  | QQSYSTLWT    | 9      | +2   | +2    | M          |  |  |
| neHD13 05  | 3-11   | 5-5  | 1  | 6  | GPRIQLWYYGMDV             | 13     | 2-28  | 1  | MQALQTPPW    | 10     | +    | +     | -          |  |  |
| neHD13 06  | 3-7    | /    | /  | 6  | LGQTYAGDYYYYYGMDV         | 17     | 2-28  | 4  | MQALQTRLT    | 9      | -    | -     | -          |  |  |
| neHD13 22  | 4-61   | 6-13 | 2  | 6  | VISSSWYDYYYYYMDV          | 16     | 2-28  | 2  | MQALQTPS     | 8      | +    | +2    | -          |  |  |
| neHD13 23# | 4-59   | 6-19 | 3  | 4  | AVAGTVYFDY                | 10     | 3-20  | 2  | QQYGSSPS     | 8      |      |       |            |  |  |
| neHD13 27  | 4-59   | 1-26 | 2  | 4  | GSYYFDY                   | 7      | 3-20  | 4  | QQYGSSLT     | 8      | -    | -     | -          |  |  |
| neHD13 30  | 3-49   | 6-13 | 3  | 6  | GEALAAAGYYGMDV            | 14     | 2-28  | 2  | MQALQTPRYT   | 10     | -    | +     | -          |  |  |
| neHD13 33  | 4-4    | 2-2  | 2  | 6  | VKETAGYCSSTSCYSPSHYYYYMDV | 25     | 1-12  | 1  | QQANSFPWT    | 9      | +    | +     | -          |  |  |
| neHD13 35  | 3-30-3 | 3-16 | 3  | 3  | EGGGGSASLGDAFDI           | 15     | 1-39  | 4  | QQSYSTPLT    | 9      | -    | -     | -          |  |  |
| neHD13 38  | 3-30   | 3-3  | 3  | 6  | ASLGIFGVNYYYYGMDV         | 18     | 2-28  | 4  | MQALQSLT     | 8      | +    | +     | -          |  |  |
| neHD13 44  | 3-30   | /    | /  | 5  | GGVRFKQNPDLWFDP           | 16     | 1-8   | 1  | QQYYSYPPT    | 9      | +2   | +     | -          |  |  |
| neHD13 45  | 3-23   | 3-16 | 1  | 4  | SGLWGLPIDY                | 10     | 3-20  | 1  | QQYGSSPPWT   | 10     | +    | -     | -          |  |  |
| neHD13 47# | 3-30-3 | 3-22 | 2  | 6  | HYDSSGHKGSYYYGMDV         | 18     | 1-39  | 5  | QQSYSTPIT    | 9      |      |       |            |  |  |
|            | VH     | D    | RF | JH | CDR3 (aa)                 | Length | Vλ    | Jλ | CDR3 (aa)    | Length | Poly | HEp-2 | Staining   |  |  |
| neHD13 03  | 4-4    | 2-15 | 2  | 6  | DLGYCSGGSCPYYYYGMDV       | 20     | 2-14  | 3  | SSYTSSRRV    | 10     | -    | +     | -          |  |  |
| neHD13 07  | 3-15   | 1-26 | 3  | 4  | EFGIVGVTPRGAAY            | 14     | 3-25  | 3  | QSADSSGLWV   | 11     | -    | -     | -          |  |  |
| neHD13 10  | 4-39   | 2-21 | 2  | 4  | YCGGDYSLYYFDY             | 13     | 2-14  | 2  | SSYTSSSTLVV  | 11     | -    | -     | -          |  |  |
| neHD13 12  | 4-59   | 3-22 | 2  | 4  | LPVCSSGYCYFDY             | 14     | 3-21  | 1  | QVWDSSTDHYV  | 11     | +    | +2    | N          |  |  |
| neHD13 15  | 1-3    | 3-10 | 2  | 6  | EESYVGATYYYYGMDV          | 16     | 1-47  | 3  | AAWDDSLSGWV  | 11     | +    | +2    | -          |  |  |
| neHD13 19  | 4-39   | 2-2  | 3  | 4  | SPFWVPAADYYFDY            | 14     | 2-14  | 2  | SSYTSSSTVV   | 10     | -    | +     | -          |  |  |
| neHD13 20  | 4-61   | 2-2  | 2  | 2  | VGVDCSSTSCYTPNWFYDL       | 19     | 1-40  | 2  | QSYDSSLGST   | 11     | -    | -     | -          |  |  |
| neHD13 28  | 3-23   | 3-22 | 3  | 4  | GSSPMIVVPSGPFYD           | 15     | 3-21  | 2  | QVWDSSTDRVV  | 11     | -    | -     | -          |  |  |
| neHD13 34  | 4-b    | 2-15 | 3  | 5  | IGVVAAGFCFDP              | 12     | 1-51  | 3  | GTWDSSTLSAGV | 11     | -    | -     | -          |  |  |
| neHD13 36  | 4-4    | 3-3  | 2  | 3  | DEDFWKAFDI                | 10     | 1-51  | 2  | GTWDSSTLSAGV | 11     | -    | -     | -          |  |  |
| neHD13 40  | 4-b    | /    | /  | 4  | GIPVREGYYFDY              | 12     | 1-47  | 2  | AAWDDSLSGVV  | 11     | -    | -     | -          |  |  |
| neHD13 48  | 4-4    | 3-10 | 2  | 4  | SSYYGSGSYFDY              | 12     | 3-1   | 2  | QAWDSSTAVV   | 10     | -    | -     | -          |  |  |
| neHD13 08  |        |      |    |    |                           |        | 2-14  | 3  | SSYTSSSTWV   | 10     |      |       |            |  |  |
|            | VH     | D    | RF | JH | CDR3 (aa)                 | Length |       |    |              |        |      |       |            |  |  |
| neHD13 13  | 3-49   | 4-17 | 2  | 2  | SSGYGDYATYWFYDL           | 15     |       |    |              |        |      |       |            |  |  |
| neHD13 14  | 1-24   | 1-26 | 3  | 5  | DLIVGAPHA                 | 9      |       |    |              |        |      |       |            |  |  |
| neHD13 26  | 3-30   | 6-19 | 2  | 5  | GPYSSGWYRGWFDP            | 14     |       |    |              |        |      |       |            |  |  |

RF, reading frame; #, antibody failed to be expressed

-, non-reactive; +, reactive; +2, highly reactive

c, diffuse cytoplasmic staining; A, actin staining; G, Golgi staining; M, mitochondria staining; MS, mitotic spindle staining; N, nuclear staining; F, cytoplasmic fibers

**Supplemental Table 4** Repertoire and reactivity of antibodies from new emigrant B cells of healthy donor P7

| Ig         | HEAVY  |      |    |    |                          |        | LIGHT          |                |             |        | REACTIVITY |       |          |
|------------|--------|------|----|----|--------------------------|--------|----------------|----------------|-------------|--------|------------|-------|----------|
|            | VH     | D    | RF | JH | CDR3 (aa)                | Length | V <sub>κ</sub> | J <sub>κ</sub> | CDR3 (aa)   | Length | Poly       | HEp-2 | Staining |
| neHDP7 01# | 1-18   | 3-22 | 3  | 5  | GGTMIVVVQGYWFDP          | 15     | 4-1            | 1              | QQYYSTPPT   | 9      |            |       |          |
| neHDP7 02  | 3-30   | 1-7  | 3  | 4  | EGEGGLTGTPWFYD           | 15     | 1-8            | 3              | QQYYSPRT    | 9      | -          | -     | -        |
| neHDP7 09  | 3-23   | 2-15 | 2  | 4  | ERSPDCSGAPTDY            | 13     | 4-1            | 4              | QQYYSTPLT   | 9      | +          | +     | c        |
| neHDP7 10  | 4-31   | 6-13 | 3  | 5  | ARFAAAGNTRDNWFDP         | 16     | 1-39           | 4              | QSYSTPLT    | 9      | -          | -     | F        |
| neHDP7 11  | 3-23   | 2-21 | 2  | 4  | DRAYCGGDCYWTGLDY         | 16     | 1-39           | 2              | QSYSTPVT    | 9      | -          | -     | -        |
| neHDP7 13  | 3-23   | 3-22 | 2  | 4  | DTATGSDYYDY              | 11     | 3-20           | 1              | QQYSSPRT    | 9      | -          | -     | -        |
| neHDP7 15  | 3-30   | 6-13 | 3  | 2  | DEAAAGTLGWYFDL           | 14     | 3-15           | 1              | QQYNNWPPGT  | 10     | -          | -     | -        |
| neHDP7 16  | 3-7    | 5-24 | 3  | 4  | DSEMATIKNFYD             | 12     | 3-15           | 2              | QQYNNWPPVT  | 10     | -          | -     | -        |
| neHDP7 18  | 3-11   | 3-10 | 2  | 6  | DRWVYVYSGSYSPHLNYYYYGMDV | 24     | 2-29           | 1              | MQSIQLPRT   | 9      | -          | -     | -        |
| neHDP7 24  | 3-23   | 5-5  | 1  | 3  | QNDPWIPGAFDI             | 12     | 3-15           | 2              | QQYNNWPYT   | 9      | -          | -     | -        |
| neHDP7 26# | 1-3    | 2-15 | 3  | 4  | DSTPAAITWYD              | 12     | 4-1            | 2              | QQYYSTPNT   | 10     |            |       |          |
| neHDP7 29  | 3-23   | 1-26 | 3  | 3  | VLGATRVSDAFDI            | 13     | 1-27           | 4              | QKYNALQT    | 9      | -          | +     | c        |
| neHDP7 30  | 3-7    | 6-19 | 3  | 4  | DQGDIAVAGYFDY            | 14     | 1-39           | 1              | QSYSTPRT    | 9      | -          | -     | -        |
| neHDP7 31  | 1-3    | 3-22 | 2  | 6  | NYYYDSRDYYYYGMDV         | 16     | 1-12           | 4              | QQANSFPST   | 9      | -          | +     | c+N      |
| neHDP7 32# | 3-30   | 5-12 | 2  | 6  | SKRGGYGRVIGYYYGMDV       | 19     | 1-9            | 4              | QQLNSYPLT   | 9      |            |       |          |
| neHDP7 35# | 3-48   | 3-3  | 2  | 6  | GSGSGSLYYYYGMDV          | 13     | 2-28           | 5              | MQALQTPT    | 8      |            |       |          |
| neHDP7 36  | 4-34   | 2-15 | 3  | 5  | GSPFKDIVVVAATESFPWFDP    | 22     | 3-15           | 3              | QQYNNWPVT   | 9      | -          | -     | -        |
| neHDP7 38  | 3-49   | 2-2  | 1  | 2  | NGQLLWPWFYDL             | 12     | 3-20           | 4              | QQYSSPPLT   | 10     | -          | -     | -        |
| neHDP7 39  | 1-69   | 3-22 | 2  | 3  | PMCGSGYCAFDI             | 13     | 3-20           | 1              | QQYSSSWT    | 9      | +          | +     | c        |
| neHDP7 40  | 1-69   | 2-15 | 2  | 6  | GYCSGSPYNYYYYGMDV        | 18     | 3-20           | 1              | QQYSSSLWT   | 9      | -          | +2    | -        |
| neHDP7 42  | 3-7    | 2-21 | 2  | 6  | DDCGGDCVNYYYYGMDV        | 18     | 1-8            | 1              | QQYYSPRT    | 9      | -          | -     | -        |
| neHDP7 44  | 3-30-3 | 6-13 | 3  | 6  | DHVPSLAAAGNTYYYYGMDV     | 20     | 1-39           | 2              | QSYSTPRT    | 9      | +          | +     | -        |
| neHDP7 46  | 3-7    | 3-3  | 3  | 6  | PFGVVTSPKRGYYYYGMDV      | 20     | 1-12           | 4              | QQANSFPLT   | 9      | -          | -     | -        |
| neHDP7 47  | 3-53   | 2-2  | 2  | 6  | DGSTSGSVYYYYGMDV         | 18     | 2-28           | 1              | MQALQTPT    | 9      | -          | -     | -        |
| neHDP7 48  | 3-15   | 6-19 | 1  | 6  | DLKQWLVDYYYYGMDV         | 17     | 3-15           | 4              | QQYNNWPPLT  | 10     | -          | +     | -        |
|            | VH     | D    | RF | JH | CDR3 (aa)                | Length | V <sub>λ</sub> | J <sub>λ</sub> | CDR3 (aa)   | Length | Poly       | HEp-2 | Staining |
| neHDP7 03  | 4-39   | 3-16 | 3  | 4  | GGVIGYGFYD               | 10     | 2-11           | 2              | CSYAGSYTVV  | 10     | +          | -     | -        |
| neHDP7 19  | 3-7    | 6-13 | 2  | 2  | SNDSWYGWYFDL             | 13     | 3-25           | 2              | QSADSSGTVV  | 10     | +          | +     | -        |
| neHDP7 23  | 3-21   | 3-22 | 2  | 4  | DQYDSSGYPY               | 10     | 3-10           | 2              | YSTDSSGNHRV | 11     | -          | +     | c        |
| neHDP7 25  | 1-18   | 6-13 | 2  | 5  | DPSSSWYNYAPNWFDP         | 16     | 1-40           | 2              | QSYDSSLGFFV | 12     | -          | +     | -        |
| neHDP7 28  |        |      |    |    | see kappa                |        | 1-47           | 1              | AAWDDSLASIV | 12     | +          | +     | G        |
| neHDP7 34  | 3-74   | 3-22 | 2  | 6  | DLYDSSGYHYHYGMDV         | 18     | 3-25           | 2              | QSADSSGTYAV | 11     | -          | +     | -        |
| neHDP7 37  | 1-69   | 3-22 | 2  | 4  | VSDSRGEDFDY              | 11     | 2-11           | 3              | CSYAGSYT    | 8      | -          | -     | -        |

RF, reading frame; #, antibody failed to be expressed

-, non-reactive; +, reactive; +2, highly reactive

c, diffuse cytoplasmic staining; A, actin staining; G, Golgi staining; M, mitochondria staining; MS, mitotic spindle staining; N, nuclear staining; F, cytoplasmic fibers

Supplemental Table 5 Repertoire and reactivity of antibodies from new emigrant B cells of healthy donor 1191

| Ig           | HEAVY |      |    |    |                         |        | LIGHT |    |              |        | REACTIVITY |       |          |
|--------------|-------|------|----|----|-------------------------|--------|-------|----|--------------|--------|------------|-------|----------|
|              | VH    | D    | RF | JH | CDR3 (aa)               | Length | Vκ    | Jκ | CDR3 (aa)    | Length | Poly       | HEp-2 | Staining |
| neHD1191 03  | 3-30  | 2-2  | 3  | 6  | KFMGVVPAAKLSPLYYYGMDV   | 22     | 2-28  | 2  | MQALQTPS     | 8      | +          | +     | -        |
| neHD1191 04  | 4-34  | 6-19 | 3  | 5  | ERIAARQLYYFDY           | 13     | 3-15  | 3  | QQYNNWPPIT   | 10     | -          | +     | -        |
| neHD1191 07  | 4-4   | 3-22 | 2  | 4  | PRYYYDSSGYD             | 12     | 1-39  | 1  | QQSYSTPRT    | 9      | -          | +     | -        |
| neHD1191 09  | 1-69  | 2-2  | 3  | 3  | GRGIVVPAAINAPDAFDI      | 19     | 1-39  | 1  | QQSYSTPRT    | 9      | +          | -     | -        |
| neHD1191 10  | 3-64  | 6-13 | 1  | 4  | EGQQLVRPPPPFFDY         | 16     | 1D-12 | 4  | QQANSFPLT    | 9      | -          | -     | -        |
| neHD1191 11  | 3-30  | 2-15 | 2  | 3  | GGTGGCYSCAFDI           | 13     | 1-8   | 2  | QQYYSYPYT    | 9      | -          | +     | M        |
| neHD1191 16  | 1-18  | 3-3  | 3  | 6  | ETAWIGFVTEKYYYYGMDV     | 21     | 3-20  | 5  | QQYGSSPPVT   | 10     | +          | -     | -        |
| neHD1191 20  | 4-4   | 2-15 | 3  | 4  | RAAPHEDIVVVAAATELDY     | 19     | 4-1   | 1  | QQYYSTPQT    | 9      | -          | +     | -        |
| neHD1191 24# | 4-6   | 3-16 | 2  | 4  | VGDYVWGSYRYHY           | 13     | 1-16  | 1  | QQYNSYPL     | 8      |            |       |          |
| neHD1191 25  | 3-49  | 3-9  | 2  | 3  | DNPQPYDILTGFDAFDI       | 18     | 1D-17 | 1  | LQHNSYPRT    | 9      | -          | -     | -        |
| neHD1191 26  | 3-30  | 1-26 | 1  | 6  | AWTEWELLPSSGMDV         | 15     | 3-20  | 1  | QQYGSSLWT    | 9      | -          | -     | -        |
| neHD1191 27  | 3-23  | 3-22 | 2  | 6  | DSPSPDSSGYYYYYGMDV      | 19     | 1-5   | 1  | QQYNSYSRT    | 9      | +          | +     | M        |
| neHD1191 29  | 3-15  | 3-10 | 3  | 6  | LIMVRGATYYYYGMDV        | 16     | 2-28  | 2  | MQALQTPYT    | 9      | -          | +     | -        |
| neHD1191 34  | 3-20  | 3-3  | 3  | 5  | VQAIFGQYVNWFDV          | 14     | 3-15  | 2  | QQYNNWPPYT   | 10     | -          | +     | -        |
| neHD1191 35  | 4-61  | 5-24 | 2  | 5  | ERRGDGYNFVWFDV          | 14     | 1-8   | 1  | QQYYSYPRT    | 9      | -          | -     | F        |
| neHD1191 42  | 3-7   | 3-22 | 2  | 5  | ALLENYYDNNVVANWFDV      | 18     | 1-8   | 1  | QQYYSYPWT    | 9      | -          | +     | -        |
| neHD1191 44# | 4-34  | 4-17 | 3  | 4  | EEGAVTTSYD              | 11     | 3-11  | 1  | QQRNSWQT     | 8      |            |       |          |
| neHD1191 41  |       |      |    |    |                         |        | 3-15  | 1  | QQYNNWSRT    | 9      |            |       |          |
|              | VH    | D    | RF | JH | CDR3 (aa)               | Length | Vλ    | Jλ | CDR3 (aa)    | Length | Poly       | HEp-2 | Staining |
| neHD1191 01  | 3-11  | 6-6  | 3  | 4  | ERIAARQLYYFDY           | 13     | 3-1   | 2  | QAWDSSTHV    | 10     | -          | -     | -        |
| neHD1191 02# | 4-39  | 6-19 | 2  | 4  | RPLSSGWPDYFDY           | 13     | 2-23  | 3  | CSYAGDSTSV   | 10     |            |       |          |
| neHD1191 05# | 4-31  | 3-10 | 2  | 4  | VDYGGSGSYNFDY           | 14     | 7-43  | 3  | LLYGGAYWV    | 10     |            |       |          |
| neHD1191 14  | 1-69  | 2-15 | 2  | 6  | GGGCSGSGCYSLTYYYGMDV    | 21     | 2-11  | 2  | CSYAGSYGV    | 10     | +          | +     | -        |
| neHD1191 15# | 5-a   | 6-19 | 2  | 4  | HLGGTGWPDY              | 10     | 1-51  | 2  | GTWDSLSAVV   | 11     |            |       |          |
| neHD1191 18  | 3-64  | 6-13 | 3  | 6  | DALDRGAAAGRYYYGMDV      | 19     | 7-43  | 2  | LLYYGGAVV    | 9      | -          | +     | -        |
| neHD1191 19# | 1-3   | 4-4  | 2  | 6  | GRRTLLNYSNYGTAPYYYYGMDV | 24     | 7-46  | 3  | LLSYSADWV    | 10     |            |       |          |
| neHD1191 21  | 3-30  | 3-10 | 3  | 5  | EDKESLGARGVLHA          | 14     | 3-21  | 2  | QVWDSSTDHV   | 11     | -          | -     | -        |
| neHD1191 33  | 1-18  | 1-26 | 3  | 3  | SIVGATRQPDVALDI         | 15     | 2-14  | 2  | SSYTSSTLV    | 10     | -          | -     | -        |
| neHD1191 36  | 5-51  | 3-22 | 2  | 5  | RVEDSSGYPT              | 11     | 1-40  | 1  | QSYDSSLGSGYV | 12     | -          | -     | -        |
| neHD1191 37  | 3-33  | 3-10 | 1  | 5  | DKNPRLLWFGELFWFDV       | 17     | 2-14  | 1  | SSYTSSTRYV   | 11     | -          | +     | F        |
| neHD1191 43  | 1-18  | 1-26 | 2  | 5  | AGVSHSGSYFWFDV          | 14     | 2-11  | 1  | CSYAGSYTYV   | 10     | -          | +     | -        |
| neHD1191 45  | 5-51  | 3-22 | 2  | 4  | RMYYDSSGYFDY            | 13     | 3-25  | 2  | QSADSSGVV    | 9      | -          | -     | -        |
| neHD1191 46  | 1-69  | 2-2  | 3  | 6  | GSIVVPAAKSHHYYYYGMDV    | 21     | 1-51  | 3  | GTWDSLSAGV   | 11     | +          | -     | -        |
| neHD1191 30  |       |      |    |    |                         |        | 3-25  | 2  | QSADSSGTCYV  | 12     |            |       |          |
|              | VH    | D    | RF | JH | CDR3 (aa)               | Length |       |    |              |        |            |       |          |
| neHD1191 08  | 4-59  | 3-10 | 2  | 4  | DAGGSGID                | 8      |       |    |              |        |            |       |          |
| neHD1191 32  | 3-15  | 1-26 | 2  | 6  | DVGVGASYYYYGMDV         | 15     |       |    |              |        |            |       |          |
| neHD1191 39  | 3-21  | 6-6  | 2  | 4  | GGDSSSPAGFDY            | 12     |       |    |              |        |            |       |          |
| neHD1191 40  | 1-3   | 6-13 | 3  | 6  | IAAAGRGGYYYYGMDV        | 15     |       |    |              |        |            |       |          |
| neHD1191 48  | 3-9   | /    | /  | 6  | DMGDSAPSSHDSYYYYGMDV    | 20     |       |    |              |        |            |       |          |

RF, reading frame; #, antibody failed to be expressed

-, non-reactive; +, reactive; +2, highly reactive

c, diffuse cytoplasmic staining; A, actin staining; G, Golgi staining; M, mitochondria staining; MS, mitotic spindle staining; N, nuclear staining; F, cytoplasmic fibers

Supplemental Table 6 Repertoire and reactivity of antibodies from new emigrant B cells of healthy donor P4

| Ig          | HEAVY  |      |    |    |                               |        | LIGHT |    |               |        | REACTIVITY |       |          |
|-------------|--------|------|----|----|-------------------------------|--------|-------|----|---------------|--------|------------|-------|----------|
|             | VH     | D    | RF | JH | CDR3 (aa)                     | Length | Vκ    | Jκ | CDR3 (aa)     | Length | Poly       | HEp-2 | Staining |
| neHDP4 02κ  | 4-34   | 3-22 | 2  | 5  | GGRSDSSGYVDN                  | 12     | 1-5   | 1  | QQYNSYAWT     | 9      | -          | +     | -        |
| neHDP4 04#  | 3-15   | 2-15 | 2  | 5  | DPLRVYCSGGSLGFSWFDP           | 20     | 1-5   | 1  | QQYNSYSPWS    | 10     |            |       |          |
| neHDP4 10   | 4-34   | 6-19 | 3  | 2  | GWEIAVANGTALLGYFDL            | 18     | 1-5   | 2  | QQYNSYSKT     | 9      | -          | +     | -        |
| neHDP4 12   | 3-33   | 3-10 | 3  | 6  | GIQVVRGRDYYYGMDV              | 16     | 1-39  | 2  | QQSYSTPRYS    | 10     | +          | +     | -        |
| neHDP4 13κ  | 4-59   | 6-13 | 3  | 4  | DRGTSAAAGAFDY                 | 12     | 4-1   | 1  | QQYYSTPLT     | 9      | -          | -     | N        |
| neHDP4 14#  | 3-30   | 4-4  | 2  | 6  | RIVDRPHINYVDYYYGMDV           | 19     | 3-15  | 2  | QQYNNWQYT     | 9      |            |       |          |
| neHDP4 15   | 3-7    | /    | /  | 4  | TGSSGAVDY                     | 9      | 1-5   | 2  | QQYNSYSPYT    | 10     | -          | -     | -        |
| neHDP4 17κ  | 3-30-3 | 3-22 | 2  | 3  | EDYYDKYASGAFDI                | 14     | 3-15  | 2  | QQYNNWPPYT    | 10     | -          | +     | -        |
| neHDP4 18   | 4-59   | /    | /  | 5  | DLRGQGSFDP                    | 10     | 3-15  | 1  | QQYNNWPRT     | 9      | -          | -     | -        |
| neHDP4 19#  | 1-69   | 6-13 | 3  | 4  | IIAAAADDY                     | 9      | 3-11  | 4  | QQRSNWPPLT    | 10     |            |       |          |
| neHDP4 20   | 3-48   | 2-2  | 2  | 4  | VGLEYCSSTSCYFYDY              | 16     | 3-15  | 3  | QQYNNWPPLT    | 10     | -          | -     | -        |
| neHDP4 21   | 4-34   | /    | /  | 5  | AHPTRYASIRGWDFP               | 16     | 1-5   | 4  | QQYNSYSL      | 8      | -          | +     | -        |
| neHDP4 26   | 4-34   | 6-25 | 2  | 5  | GPGYFSPHNWFDP                 | 13     | 3-11  | 5  | QQRSNWPRGIT   | 11     | +          | +     | F        |
| neHDP4 27#  | 5-a    | 2-2  | 1  | 5  | TYQLLHGGWFDP                  | 12     | 3-20  | 1  | QQYGSSPWWT    | 10     |            |       |          |
| neHDP4 28   | 4-31   | /    | /  | 6  | EANRYGMDV                     | 9      | 3-11  | 3  | QQRSNLIFT     | 9      | -          | -     | -        |
| neHDP4 32#  | 4-34   | 2-2  | 2  | 2  | GRNCSSTSCFVLGIAVAGYWFYFDL     | 24     | 4-1   | 4  | QQYYSTPLT     | 9      |            |       |          |
| neHDP4 33κ  | 3-64   | /    | /  | 4  | GRQEVGIFDY                    | 10     | 1-39  | 3  | QQSYSTLFT     | 9      | -          | -     | -        |
| neHDP4 35   | 3-23   | 4-4  | 2  | 5  | DSYSSQGWDFP                   | 11     | 3-20  | 1  | QQYGSSPRT     | 9      | -          | -     | -        |
| neHDP4 41κ# | 3-30-3 | 2-21 | 2  | 6  | DSPGPLSTEHCGGDCYPQSGYYYYYGMDV | 29     | 1-27  | 3  | QKYNAPPLT     | 10     |            |       |          |
| neHDP4 46#  | 1-69   | 3-9  | 2  | 5  | DPHDILTGYSPNWFDP              | 16     | 3-11  | 2  | QQRSNWPPYT    | 10     |            |       |          |
| neHDP4 31   |        |      |    |    |                               |        | 1-39  | 4  | QQSYSTPPT     | 9      |            |       |          |
| neHDP4 37   |        |      |    |    |                               |        | 1-12  | 4  | QQANSFPRT     | 9      |            |       |          |
|             | VH     | D    | RF | JH | CDR3 (aa)                     | Length | Vλ    | Jλ | CDR3 (aa)     | Length | Poly       | HEp-2 | Staining |
| neHDP4 01   | 6-1    | 6-19 | 2  | 4  | DPHRGSSGWEPFDY                | 15     | 1-44  | 2  | AAWDDSLNGPV   | 11     | -          | -     | -        |
| neHDP4 02λ# |        |      |    |    | see kappa                     |        | 1-36  | 2  | AAWDDSLNGVV   | 11     |            |       |          |
| neHDP4 05   | 3-11   | 4-17 | 3  | 2  | EPLGTTVTPHWYFDL               | 15     | 2-14  | 2  | SSYTSSSTLVV   | 11     | -          | -     | -        |
| neHDP4 07   | 4-59   | 2-2  | 2  | 6  | GWMGYCSSTSCYRDYYYGMDV         | 22     | 1-47  | 2  | AAWDDSLSGPV   | 11     | +          | +     | -        |
| neHDP4 08   | 3-21   | 6-13 | 1  | 6  | SLGQQLVTSSGYYYGMDV            | 18     | 1-44  | 2  | AAWDDSLNGVV   | 11     | -          | -     | -        |
| neHDP4 09#  | 4-31   | 1-26 | 2  | 3  | EVGSPYSGSHPRGAFDI             | 17     | 1-44  | 3  | AAWDDSLNGLV   | 11     |            |       |          |
| neHDP4 13λ# |        |      |    |    | see kappa                     |        | 2-11  | 1  | CSYAGSYTYVV   | 11     |            |       |          |
| neHDP4 17λ  |        |      |    |    | see kappa                     |        | 1-40  | 2  | QSYDSSLGSGWV  | 12     | -          | +     | -        |
| neHDP4 22   | 3-11   | 3-10 | 1  | 6  | VWFGELSRGMDV                  | 12     | 2-14  | 1  | SSYTSSCYV     | 9      | -          | +     | -        |
| neHDP4 24#  | 1-18   | 1-26 | 2  | 4  | DRPGADSGSSLEPFDY              | 16     | 3-27  | 2  | YSAADNNRV     | 9      |            |       |          |
| neHDP4 25   | 4-34   | 4-23 | 3  | 5  | GTVVTPASWFDP                  | 12     | 3-1   | 2  | QAWDSSSTVV    | 9      | -          | -     | F        |
| neHDP4 30   | 3-53   | 6-6  | 2  | 6  | GGDSSSSGEEYYYGMDV             | 18     | 3-1   | 2  | QAWDSSSTVV    | 9      | -          | -     | -        |
| neHDP4 33λ# |        |      |    |    | see kappa                     |        | 3-21  | 1  | QVWDDSSDHLVY  | 12     |            |       |          |
| neHDP4 34   | 1-69   | 2-8  | 2  | 6  | DSSNHYCTNGVCPSSYRYYYYYGMDV    | 26     | 7-43  | 3  | LLYYGGAPV     | 9      | +          | +     | -        |
| neHDP4 38   | 3-11   | /    | /  | 6  | DATYMGVGTPLSGTLDV             | 16     | 1-44  | 3  | AAWDDSLNGPV   | 11     | -          | -     | -        |
| neHDP4 40   | 4-34   | 2-2  | 3  | 5  | GADIRQVVVPAIWFDP              | 17     | 2-14  | 2  | SSYTSSSTPVV   | 11     | -          | -     | -        |
| neHDP4 41λ# |        |      |    |    | see kappa                     |        | 4-69  | 3  | QTWGTGIL      | 8      |            |       |          |
| neHDP4 44   | 4-B    | 3-3  | 3  | 6  | RVVDPTSYYYYGMDV               | 15     | 9-49  | 2  | GADHGSGSNFVYR | 13     | +          | -     | c+N      |
| neHDP4 45   | 1-18   | 1-26 | 1  | 4  | VWEWELIPRFDY                  | 13     | 1-40  | 2  | QSYDSSLGSGNVV | 13     | -          | -     | -        |
| neHDP4 31λ  |        |      |    |    |                               |        | 1-51  | 3  | GTWDDSSLSALWV | 12     |            |       |          |
|             | VH     | D    | RF | JH | CDR3 (aa)                     | Length |       |    |               |        |            |       |          |
| neHDP4 16   | 1-69   | 2-15 | 2  | 4  | EVNHGYCSGGSCYFYDY             | 19     |       |    |               |        |            |       |          |
| neHDP4 39   | 4-34   | 2-15 | 2  | 6  | VICSGGSCYHKGLYGMV             | 19     |       |    |               |        |            |       |          |
| neHDP4 43   | 3-23   | 3-22 | 2  | 4  | GKQDSSGYTQGFY                 | 15     |       |    |               |        |            |       |          |
| neHDP4 48   | 1-69   | /    | /  | 6  | GKTPPYYYYGMDV                 | 13     |       |    |               |        |            |       |          |

RF, reading frame; #, antibody failed to be expressed

-, non-reactive; +, reactive; +2, highly reactive

c, diffuse cytoplasmic staining; A, actin staining; G, Golgi staining; M, mitochondria staining; MS, mitotic spindle staining; N, nuclear staining; F, cytoplasmic fibers

Supplemental Table 7 Repertoire and reactivity of antibodies from new emigrant B cells of healthy donor 138

| Ig          | HEAVY  |              |        |    |                               | LIGHT  |      |    |              |        | REACTIVITY |       |          |
|-------------|--------|--------------|--------|----|-------------------------------|--------|------|----|--------------|--------|------------|-------|----------|
|             | VH     | D            | RF     | JH | CDR3 (aa)                     | Length | Vκ   | Jκ | CDR3 (aa)    | Length | Poly       | HEp-2 | Staining |
| neHD138 01  | 3-30-3 | 3-10         | 2      | 5  | LYYYGSGSPTPTNSNWFPD           | 19     | 1-17 | 1  | LQHNSYPWT    | 9      | +          | +     | -        |
| neHD138 02  | 1-24   | 3-22         | 2      | 4  | ESYYDSSGYYPFWY                | 15     | 3-20 | 1  | QQYGSSPPWT   | 10     | -          | -     | -        |
| neHD138 03  | 1-69   | 6-13         | 2      | 4  | DKSSSWVYDY                    | 10     | 1-39 | 1  | QQSYSTPPR    | 9      | +2         | +     | -        |
| neHD138 05  | 3-21   | 1-1          | 2      | 4  | DDSRADNWNDEGGGRAFDY           | 19     | 3-15 | 1  | QQYNNWRRT    | 9      | +2         | +     | c        |
| neHD138 06  | 3-23   | 5-5          | 3      | 4  | DEGRGWDTAMVTREGSPFDY          | 20     | 3-15 | 5  | QQYNNWPPIT   | 10     | -          | -     | -        |
| neHD138 10  | 3-48   | 3-10         | 2      | 4  | FGVPYYGSGSYNPRGLDY            | 20     | 3-20 | 2  | QQYGSSPPMYT  | 11     | +          | +     | -        |
| neHD138 16  | 3-30-3 | 3-22         | 2      | 4  | DLSLVYYYDSSGSPFDY             | 18     | 3-20 | 1  | QQYGSSKRWT   | 10     | -          | -     | -        |
| neHD138 17  | 1-18   | 2-21         | 3      | 4  | EALSEGTVVVTALGLYYFDY          | 21     | 1-39 | 2  | QQSYSTPYT    | 9      | -          | +     | -        |
| neHD138 18  | 4-61   | /            | /      | 4  | ENVGLDY                       | 7      | 1-33 | 2  | QQYDNLPRT    | 9      | -          | -     | -        |
| neHD138 19  | 4-34   | 5-5          | 2      | 3  | KRGYSYGPPRPYDAFDI             | 17     | 1-5  | 1  | QQYNSYSPT    | 9      | -          | -     | -        |
| neHD138 21  | 3-7    | 5-5          | 2      | 4  | LGYSYGFGRGDY                  | 12     | 1-12 | 4  | QQANSFPLT    | 9      | -          | -     | -        |
| neHD138 23  | 3-7    | 6-13         | 1      | 4  | SPEQQLGRTFDY                  | 12     | 3-15 | 3  | QQYNNWPPEGFT | 12     | -          | -     | -        |
| neHD138 24  | 4-61   | 3-22         | 2      | 4  | RAFSYDSSGYSPFDY               | 16     | 4-1  | 1  | QQYYSTPWT    | 9      | -          | +     | -        |
| neHD138 25  | 3-74   | 3-10         | 2      | 6  | LVLGSGSWPAGYYYGMDV            | 19     | 1-33 | 4  | QQYDNLPLT    | 9      | -          | +     | -        |
| neHD138 26  | 3-33   | 5-24         | 1      | 3  | GGRLQMGPLDAFDI                | 14     | 3-15 | 1  | QQYNNWPPWT   | 10     | -          | -     | -        |
| neHD138 27  | 1-69   | 3-22         | 3      | 4  | VTKQRGTMIVGVSFDY              | 16     | 3-15 | 2  | QQYNNWPPST   | 10     | +          | +     | -        |
| neHD138 28  | 4-34   | 2-15         | 3      | 5  | RPSIVVAATVFDP                 | 14     | 3-20 | 5  | QQYGSSPPIT   | 10     | +          | +     | -        |
| neHD138 34  | 3-23   | 2-21         | 2      | 6  | CGGYYYGMDV                    | 10     | 3-20 | 1  | QQYGSSPRWT   | 10     | -          | -     | -        |
| neHD138 36  | 3-23   | 5-12<br>1-26 | 2<br>3 | 5  | IVASSENRYGSGYDSSRVGATLQADWFDP | 29     | 2-28 | 4  | MQALQTPLT    | 9      | +          | +     | -        |
| neHD138 37  | 1-18   | 1-7          | 3      | 6  | DVRARHPKLTGTTDGYGMDV          | 22     | 1-39 | 4  | QQSYSTPLT    | 9      | -          | -     | -        |
| neHD138 39  | 3-30   | /            | /      | 4  | DFVGVWRSFGYYFDY               | 15     | 3-20 | 4  | QQYGSSPELT   | 10     | +          | +     | -        |
| neHD138 41  | 3-21   | /            | /      | 3  | ALAKGGAFDI                    | 10     | 1-33 | 4  | QQYDNLRALT   | 10     | -          | -     | -        |
| neHD138 42  | 3-30-3 | /            | /      | 6  | VAARGSWAPHYYYYMDV             | 17     | 2-28 | 3  | MQALQTPVT    | 9      | +          | +     | -        |
| neHD138 43  | 3-64   | 6-6          | 3      | 4  | AAWGIAARPGESYFDY              | 16     | 3-20 | 1  | QQYGSSPET    | 9      | -          | -     | -        |
| neHD138 45  | 4-31   | 2-15         | 2      | 6  | VLCGGSCYPYYYYYMDV             | 20     | 3-15 | 1  | QQYNNWPPST   | 10     | +2         | +     | c        |
| neHD138 47  | 3-30   | 4-17         | 3      | 3  | PRTTTVTGADAFDI                | 15     | 1-5  | 1  | QQYNSYSTT    | 9      | -          | -     | -        |
| neHD138 48  | 3-15   | 5-5          | 3      | 6  | QTMVTGYYYYGMDV                | 14     | 3-11 | 3  | QQRSNWPPPT   | 9      | +          | +     | -        |
|             | VH     | D            | RF     | JH | CDR3 (aa)                     | Length | Vλ   | Jλ | CDR3 (aa)    | Length | Poly       | HEp-2 | Staining |
| neHD138 11  | 3-7    | 1-1          | 2      | 4  | AGDNWNDDIDY                   | 11     | 3-27 | 2  | YSAADNNGV    | 9      | -          | -     | -        |
| neHD138 12  | 4-30-2 | /            | /      | 3  | VTPLDAFDI                     | 9      | 1-40 | 3  | QSYDSSLGWV   | 11     | -          | -     | -        |
| neHD138 22  | 1-69   | 2-15         | 2      | 5  | EDCSGGSCYRWFPD                | 14     | 2-14 | 1  | SSYSSSTRLYV  | 12     | +          | -     | -        |
| neHD138 29  | 3-7    | 3-22         | 2      | 6  | ADYYDSSGYYPYGMV               | 16     | 1-47 | 3  | AAWDDSLSGRV  | 11     | -          | -     | -        |
| neHD138 30# | 3-23   | 6-13         | 2      | 5  | TYSSSWYDWFPD                  | 12     | 2-8  | 3  | SSYAGSNLKV   | 11     |            |       |          |
| neHD138 31  | 3-9    | 2-2          | 3      | 6  | DNSPEVVPAGGDDYYYYYMDV         | 21     | 8-61 | 3  | VLYMGSGSWV   | 10     | -          | -     | -        |
| neHD138 35  | 1-8    | /            | /      | 6  | SMLPLDV                       | 7      | 1-44 | 3  | AAWDDSLNGHWV | 12     | -          | -     | -        |
| neHD138 40  | 3-9    | 6-19         | 3      | 3  | EYVKLAVALGEQSDAFDI            | 18     | 1-51 | 3  | GTWDDSSLGAGV | 11     | -          | -     | -        |
| neHD138 44# | 1-2    | 6-13         | 3      | 3  | IAAAGPNSYNDAFDI               | 15     | 1-40 | 3  | QSYDSSLGWV   | 11     |            |       |          |
| neHD138 46  | 3-49   | 3-22         | 2      | 1  | GGLAYTYYYDSSGSEYFQH           | 19     | 2-18 | 3  | SSYSSSTFGWV  | 12     | +          | -     | -        |

RF, reading frame; #, antibody failed to be expressed

-, non-reactive; +, reactive; +2, highly reactive

c, diffuse cytoplasmic staining; A, actin staining; G, Golgi staining; M, mitochondria staining; MS, mitotic spindle staining; N, nuclear staining; F, cytoplasmic fibers

Supplemental Table 8 Repertoire and reactivity of antibodies from new emigrant B cells of healthy donor 535

| Ig          | HEAVY  |      |    |    |                         | LIGHT  |      |    |               |        | REACTIVITY |       |          |
|-------------|--------|------|----|----|-------------------------|--------|------|----|---------------|--------|------------|-------|----------|
|             | VH     | D    | RF | JH | CDR3 (aa)               | Length | Vk   | Jk | CDR3 (aa)     | Length | Poly       | Hep-2 | Staining |
| neHD535 03  | 3-23   | /    | /  | 5  | DRGSLNWFDP              | 10     | 1-5  | 1  | QQYNSYSRT     | 9      | -          | +     | N        |
| neHD535 06  | 4-59   | 4-17 | 2  | 4  | SPHYGDYVS               | 9      | 1-33 | 3  | QQYDNLPPPT    | 9      | -          | -     | -        |
| neHD535 08  | 3-23   | 2-15 | 3  | 2  | SPPSGLVVAATRYFDL        | 17     | 1-5  | 2  | QQYNSYYT      | 8      | +          | +     | -        |
| neHD535 12  | 3-9    | 5-12 | 2  | 5  | DIGYSYGWFDL             | 12     | 3-11 | 4  | QQRSNWPPRLT   | 11     | -          | +     | -        |
| neHD535 14  | 3-30   | 6-19 | 3  | 4  | DFSVAGTSDYFDY           | 13     | 3-11 | 4  | QQRSNWPLT     | 9      | -          | -     | -        |
| neHD535 15  | 4-34   | 3-10 | 2  | 4  | AAPSSGSYYTAFGY          | 14     | 1-39 | 1  | QQSYSTPPT     | 9      | -          | +     | -        |
| neHD535 20# | 3-30   | 3-10 | 2  | 4  | DLSGSGSYSDY             | 11     | 2-30 | 1  | MQGTHWPPA     | 9      |            |       |          |
| neHD535 23  | 4-61   | 2-2  | 2  | 3  | GYCSSTSCYGRVHAFDI       | 18     | 1-5  | 1  | QQYNSYPGT     | 9      | +          | +     | N        |
| neHD535 25  | 4-34   | /    | /  | 5  | GGRPVQNPWFDP            | 13     | 3-20 | 2  | QQYGSPPQYT    | 10     | -          | +     | -        |
| neHD535 26  | 4-34   | 5-12 | 3  | 5  | GQVQIVATDPANWFDP        | 16     | 4-1  | 2  | QQYYSTPRT     | 9      | -          | -     | -        |
| neHD535 32  | 3-30   | /    | /  | 3  | DDSPRESYRGAFDI          | 15     | 1-39 | 2  | QQSYSTPYT     | 9      | -          | -     | -        |
| neHD535 33  | 1-69   | 2-2  | 3  | 6  | DPGKQVVAASF             | 12     | 1-39 | 1  | QQSYSTLWT     | 9      | +2         | +2    | -        |
| neHD535 35  | 4-61   | /    | /  | 5  | GRPALFDP                | 8      | 1-33 | 3  | QQYDNLPT      | 9      | -          | -     | -        |
| neHD535 38  | 3-48   | 4-4  | 3  | 6  | LIGSLTVTTHADYYGMDV      | 20     | 3-11 | 3  | QQRSNWPLT     | 9      | +          | +2    | -        |
| neHD535 44κ | 4-34   | 2-2  | 3  | 5  | GGNIVVPAATWFDP          | 15     | 1-39 | 1  | QQSYSTPWT     | 9      | -          | +     | -        |
| neHD535 45  | 3-23   | 3-10 | 1  | 6  | IPHHVWFGEWPGDYGMDV      | 22     | 2-28 | 1  | MQALQTPS      | 8      | -          | -     | -        |
| neHD535 46# | 3-30   | 3-3  | 1  | 6  | AQGFLEWYYYGMDV          | 16     | 4-1  | 3  | QQYYSTPFT     | 9      |            |       |          |
| neHD535 49  | 3-23   | 3-22 | 3  | 4  | LLIVVIGDFDY             | 12     | 1-6  | 2  | LQDYNYPYT     | 9      | +          | +     | -        |
| neHD535 56  | 4-30-2 | 4-4  | 3  | 6  | TVTTAEDYYGMDV           | 14     | 1-12 | 2  | QQANSFPYT     | 9      | -          | -     | -        |
| neHD535 57  | 3-23   | 1-26 | 2  | 4  | HYSGSYYGYFDY            | 12     | 1-27 | 3  | QKYNAPLT      | 9      | -          | -     | -        |
| neHD535 63  | 3-30   | 3-22 | 2  | 4  | DVYYDSSGYDY             | 13     | 1-8  | 4  | QQYYSYPALT    | 10     | -          | -     | -        |
| neHD535 64  | 3-30   | 6-19 | 3  | 4  | DFYVAVAGPYFDY           | 15     | 1-5  | 4  | QQYNSIGCT     | 9      | +          | +     | -        |
| neHD535 68  | 1-18   | 5-5  | 2  | 4  | VPHWSYSYGKSPINFDY       | 18     | 1-39 | 2  | QQSYSTPYT     | 9      | +2         | +     | -        |
| neHD535 69  | 3-15   | 2-21 | 2  | 4  | DPAAYCGDCFFDY           | 15     | 1-16 | 4  | QQYNSYPST     | 9      | -          | -     | -        |
| neHD535 76  | 3-53   | 3-22 | 2  | 3  | LGYYDSSGAKAFDI          | 16     | 1-39 | 2  | QQSYSTPPYS    | 10     | -          | -     | -        |
| neHD535 77# | 4-39   | /    | /  | 6  | HPRGSSYYYGMDV           | 14     | 1-9  | 4  | QQLNSYPLT     | 9      |            |       |          |
| neHD535 02  |        |      |    |    |                         |        | 1-39 | 2  | QQSYSTPPYT    | 10     |            |       |          |
| neHD535 11  |        |      |    |    |                         |        | 1-39 | 1  | QQYSKSWT      | 9      |            |       |          |
| neHD535 28  |        |      |    |    |                         |        | 1-13 | 5  | QQFNSYPIT     | 9      |            |       |          |
| neHD535 29  |        |      |    |    |                         |        | 2-28 | 2  | MQALQTPQ      | 9      |            |       |          |
| neHD535 52  |        |      |    |    |                         |        | 4-1  | 2  | QQYYSTPYS     | 9      |            |       |          |
| neHD535 55  |        |      |    |    |                         |        | 1-39 | 1  | QQSYSTPRT     | 9      |            |       |          |
| neHD535 60  |        |      |    |    |                         |        | 1-17 | 4  | LQHNSYPALT    | 10     |            |       |          |
| neHD535 75  |        |      |    |    |                         |        | 1-5  | 1  | QQYNSYSGT     | 9      |            |       |          |
| neHD535 78  |        |      |    |    |                         |        | 3-20 | 4  | QQYGSPPRT     | 9      |            |       |          |
| neHD535 80  |        |      |    |    |                         |        | 4-1  | 1  | QQYYSTPWT     | 10     |            |       |          |
| neHD535 81  |        |      |    |    |                         |        | 1-9  | 4  | QQLNSYPLT     | 9      |            |       |          |
| neHD535 82  |        |      |    |    |                         |        | 1-39 | 2  | QQSYSTPPWYS   | 11     |            |       |          |
| neHD535 83  |        |      |    |    |                         |        | 2-28 | 4  | MQALQTPS      | 8      |            |       |          |
| neHD535 84  |        |      |    |    |                         |        | 3-15 | 4  | QQYNNWPLT     | 9      |            |       |          |
| neHD535 85  |        |      |    |    |                         |        | 1-33 | 2  | QQYDNLPRS     | 9      |            |       |          |
| neHD535 90  |        |      |    |    |                         |        | 1-39 | 4  | QQSYSTPLT     | 9      |            |       |          |
| neHD535 92  |        |      |    |    |                         |        | 1-16 | 4  | QQYNSYPLT     | 9      |            |       |          |
| neHD535 93  |        |      |    |    |                         |        | 3-15 | 2  | QQYNNWPFYS    | 10     |            |       |          |
| neHD535 94  |        |      |    |    |                         |        | 2-28 | 3  | MQALQTPFT     | 9      |            |       |          |
| neHD535 96  |        |      |    |    |                         |        | 3-20 | 2  | QQYGSPPYMYT   | 12     |            |       |          |
| neHD535 16  | 4-34   | 3-10 | 3  | 6  | RHVSMVRGBVRTPSYGMVDV    | 18     | 1-47 | 1  | AAWDDSLSGPNYV | 13     | +          | +2    | -        |
| neHD535 21  | 3-11   | 5-5  | 1  | 4  | EYRLKGVWLPDY            | 12     | 3-21 | 1  | QVWDSSTDHNYV  | 12     | -          | +     | -        |
| neHD535 31  | 3-66   | 3-16 | 2  | 4  | SGDDYVWGGEGY            | 12     | 3-1  | 2  | QAWDSSTVV     | 9      | -          | -     | -        |
| neHD535 40# | 1-69   | 2-15 | 3  | 6  | DRVVAATAGYYYGMDV        | 17     | 3-21 | 2  | QVWDSDDLTVV   | 11     |            |       |          |
| neHD535 43  | 4-59   | 3-22 | 2  | 4  | LDSSGYNFDY              | 10     | 3-27 | 2  | YSAADNNV      | 9      | -          | +     | -        |
| neHD535 44λ |        |      |    |    | See kappa               |        | 3-1  | 1  | QAWDSSAYV     | 9      |            |       |          |
| neHD535 58  | 3-48   | 3-22 | 2  | 3  | DGLREPTGAYYYDSSGRPWAFDI | 24     | 3-21 | 1  | QVWDSSDSYV    | 11     | -          | -     | N        |
| neHD535 59  | 4-61   | /    | /  | 6  | DSPVVRGGGMDV            | 12     | 1-40 | 1  | QSYDSSLAYV    | 11     | -          | -     | -        |
| neHD535 61  | 1-24   | 6-13 | 3  | 5  | DRGAAGPRGWFDL           | 14     | 3-1  | 2  | QAWDSSTVV     | 9      | -          | -     | -        |
| neHD535 67# | 1-69   | /    | /  | 6  | DEGGYYYGMDV             | 12     | 2-14 | 2  | SSYTSSSTLVV   | 11     |            |       |          |
| neHD535 70  | 3-30   | 3-3  | 1  | 6  | SRFLEWLLYYGMDV          | 15     | 1-44 | 2  | AAWDDSLNGHV   | 12     | +          | -     | -        |
| neHD535 71# | 3-30   | 4-17 | 2  | 6  | DVNGDYYYGMDV            | 14     | 3-1  | 2  | QAWDSSSTHV    | 10     |            |       |          |
| neHD535 07  |        |      |    |    |                         |        | 3-21 | 2  | QVWDSSTDHV    | 11     |            |       |          |
| neHD535 50  |        |      |    |    |                         |        | 2-14 | 3  | SSYTSSSTLV    | 10     |            |       |          |
| neHD535 65  |        |      |    |    |                         |        | 1-47 | 3  | AAWDDSLSGTGV  | 12     |            |       |          |
| neHD535 73  |        |      |    |    |                         |        | 1-44 | 2  | AAWDDSLNGVV   | 11     |            |       |          |
| neHD535 86  |        |      |    |    |                         |        | 1-51 | 1  | GTWDDSLAYV    | 11     |            |       |          |
| neHD535 87  |        |      |    |    |                         |        | 2-14 | 2  | SSYTSSSTVV    | 10     |            |       |          |
| neHD535 88  |        |      |    |    |                         |        | 1-44 | 2  | AAWDDSLNV     | 10     |            |       |          |
| neHD535 89  |        |      |    |    |                         |        | 2-14 | 1  | SSYTSSSTLYV   | 11     |            |       |          |
| neHD535 91  |        |      |    |    |                         |        | 3-21 | 1  | QVWDSSTDHYV   | 11     |            |       |          |
| neHD535 17  | 4-59   | 3-10 | 2  | 4  | GHYGSGSYFDY             | 12     |      |    |               |        |            |       |          |
| neHD535 72  | 3-30   | 1-26 | 3  | 6  | GGAVGATYYGMDV           | 15     |      |    |               |        |            |       |          |

RF, reading frame; #, antibody failed to be expressed

-, non-reactive; +, reactive; +2, highly reactive

c, diffuse cytoplasmic staining; A, actin staining; G, Golgi staining; M, mitochondria staining; MS, mitotic spindle staining; N, nuclear staining; F, cytoplasmic fibers

**Supplemental Table 9** Repertoire and reactivity of antibodies from new emigrant B cells of healthy donor 837

| Ig          | HEAVY  |      |    |    |                         | LIGHT  |      |    |             |        | REACTIVITY |       |          |
|-------------|--------|------|----|----|-------------------------|--------|------|----|-------------|--------|------------|-------|----------|
|             | VH     | D    | RF | JH | CDR3 (aa)               | Length | Vκ   | Jκ | CDR3 (aa)   | Length | Poly       | HEp-2 | Staining |
| neHD837 01  | 3-23   | /    | /  | 2  | ATWRYFDL                | 8      | 3-15 | 4  | QQYNNWPPAT  | 10     | +          | +     | F        |
| neHD837 04  | 3-33   | /    | /  | 6  | DTEVGGGYYYYYGMVDV       | 16     | 3-11 | 4  | QQRSNWPLT   | 9      | -          | -     | -        |
| neHD837 05  | 1-69   | 3-16 | 2  | 4  | DPYDYVWGSYRPPGGLIPFYFDY | 23     | 3-15 | 4  | QQYNNWPPLT  | 10     | +          | +     | -        |
| neHD837 07# | 4-34   | /    | /  | 2  | PGPLVRYFDL              | 10     | 4-1  | 2  | QQYYSTPPYT  | 10     |            |       |          |
| neHD837 08  | 3-30   | 2-2  | 3  | 6  | DNLIVVVPAAARVGMVDV      | 16     | 1-39 | 1  | QQSYSTPWT   | 9      | +          | -     | -        |
| neHD837 09  | 4-34   | 4-17 | 3  | 5  | GGGMTTVTTVWFDP          | 14     | 4-1  | 2  | QQYYSTPYT   | 9      | -          | -     | -        |
| neHD837 11  | 4-31   | /    | /  | 5  | ERLGNWFDP               | 9      | 3-20 | 2  | QQYGSSTPT   | 9      | -          | +     | -        |
| neHD837 12  | 4-34   | 3-22 | 2  | 3  | HTTNYDSSCAFDI           | 13     | 1-39 | 3  | QQSYSTPRT   | 9      | -          | +     | -        |
| neHD837 13  | 3-15   | 3-3  | 2  | 6  | EVLGYDFWSGY             | 13     | 2-28 | 4  | MQALQTPG    | 8      | -          | -     | -        |
| neHD837 16  | 4-34   | 6-19 | 2  | 5  | GGSSGEHPRPGWFDP         | 16     | 4-1  | 2  | QQYYSTPAT   | 9      | -          | -     | -        |
| neHD837 18  | 4-31   | /    | /  | 3  | FQPTVVDKGAFDI           | 13     | 1-6  | 1  | LQDYNPLT    | 9      | -          | -     | -        |
| neHD837 20  | 1-69   | /    | /  | 4  | ELANEPVGY               | 9      | 3-20 | 1  | QQYGSSTPQT  | 9      | -          | -     | -        |
| neHD837 22  | 4-34   | 2-2  | 3  | 5  | GHGDDGVVTRAHANWFDP      | 19     | 4-1  | 1  | QQYYSTPPT   | 9      | -          | -     | -        |
| neHD837 25  | 1-69   | 2-2  | 2  | 6  | AASGRYCSSTSCIWGAAYGMVDV | 22     | 1-39 | 3  | QQSYSTPFT   | 9      | +          | +     | c        |
| neHD837 26  | 3-7    | 5-5  | 2  | 6  | DRTVGSYGLGMDV           | 14     | 1-8  | 3  | QQYYSYPFT   | 9      | -          | +     | M        |
| neHD837 29  | 4-31   | 3-22 | 2  | 5  | SNYYDSGSLSG             | 9      | 3-15 | 2  | QQYNNWPAER  | 10     | -          | +     | M        |
| neHD837 30  | 3-48   | 3-22 | 3  | 4  | GRITMTDY                | 8      | 1-6  | 1  | LQDYNYPWT   | 9      | -          | +     | F        |
| neHD837 32  | 3-30-3 | 6-19 | 1  | 4  | EWLQAGAPFDY             | 12     | 1-8  | 3  | QQYYSYPFT   | 9      | -          | -     | -        |
| neHD837 33  | 4-34   | 1-7  | 3  | 5  | PGKATGTRNPNWFDP         | 16     | 4-1  | 2  | QQYYSTPYT   | 9      | -          | -     | -        |
| neHD837 34# | 6-1    | /    | /  | 5  | EDSTIDP                 | 7      | 1-8  | 3  | QQYYSYPFT   | 10     |            |       |          |
| neHD837 35  | 3-21   | 6-19 | 2  | 4  | VSSGWYYHY               | 9      | 1-27 | 3  | QKYNAPFT    | 9      | -          | +     | -        |
| neHD837 36  | 3-48   | /    | /  | 4  | DGRSTYYETFDY            | 12     | 1-5  | 2  | QQYNSYSYS   | 9      | -          | -     | -        |
|             | VH     | D    | RF | JH | CDR3 (aa)               | Length | Vλ   | Jλ | CDR3 (aa)   | Length | Poly       | HEp-2 | Staining |
| neHD837 02# | 3-23   | 1-26 | 3  | 3  | GLRVGATGAFDI            | 12     | 3-21 | 3  | QVWDSSSDPWV | 11     |            |       |          |
| neHD837 06  | 3-15   | 2-15 | 3  | 3  | EVVAATQVFFYSSLGLI       | 17     | 1-40 | 1  | QSYDSSLGYSV | 11     | -          | -     | -        |
| neHD837 14  | 3-21   | 5-5  | 3  | 4  | EHVDTAMVLYFDY           | 14     | 3-21 | 2  | QVWDSSSDHPV | 11     |            |       |          |
| neHD837 15  | 3-33   | /    | /  | 6  | SASGGRHYYYYYGMVDV       | 16     | 3-21 | 2  | QVWDSSSDHVV | 11     | -          | +     | -        |
| neHD837 17  | 4-b    | /    | /  | 4  | VRPGWPSTGGSFDY          | 14     | 1-40 | 3  | QSYDSSLGYSV | 11     | -          | +     | F        |
| neHD837 21# | 3-30-3 | /    | /  | 6  | DPVPYYYYYGMVDV          | 13     | 2-14 | 2  | SSYTSSSTLV  | 10     |            |       |          |
| neHD837 27  | 3-30   | 6-13 | 2  | 4  | DLYLRSWYFLPIDY          | 14     | 2-14 | 2  | SSYTSSSTLV  | 10     | -          | +     | -        |
| neHD837 31  | 3-23   | 5-24 | 2  | 3  | PNRDGYNKGAFDI           | 13     | 1-44 | 3  | AAWDDSLNGPV | 11     | -          | -     | -        |
|             | VH     | D    | RF | JH | CDR3 (aa)               | Length |      |    |             |        |            |       |          |
| neHD837 10  | 1-69   | 5-12 | 2  | 4  | DYKSRGGYSGYGSDFDY       | 18     |      |    |             |        |            |       |          |

RF, reading frame; #, antibody failed to be expressed

-, non-reactive; +, reactive; +2, highly reactive

c, diffuse cytoplasmic staining; A, actin staining; G, Golgi staining; M, mitochondria staining; MS, mitotic spindle staining; N, nuclear staining; F, cytoplasmic fibers

**Supplemental Table 10** Repertoire and reactivity of antibodies from mature naive B cells of healthy donor 750

| Ig         | HEAVY |      |    |    |                       | LIGHT  |       |    |             |        | REACTIVITY |       |          |
|------------|-------|------|----|----|-----------------------|--------|-------|----|-------------|--------|------------|-------|----------|
|            | VH    | D    | RF | JH | CDR3 (aa)             | Length | Vκ    | Jκ | CDR3 (aa)   | Length | Poly       | HEp-2 | Staining |
| mHD750 01  | 3-53  | 3-22 | 2  | 3  | VYYDSFDAFDI           | 11     | 1-39  | 2  | QQSYSTPMYT  | 10     | -          | -     | -        |
| mHD750 07  | 3-66  | /    | /  | 4  | WGNEDGGNY             | 9      | 1-39  | 1  | QQSYSTLWT   | 9      | -          | +     | -        |
| mHD750 21  | 1-46  | 5-5  | 1  | 6  | GGTWIQPFMDV           | 12     | 2-28  | 2  | MQALQTPYT   | 9      | -          | +     | -        |
| mHD750 26  | 3-7   | 6-6  | 1  | 4  | DWGLVKQLWGVDFDY       | 16     | 1-39  | 4  | QQSYSTPPRT  | 10     | -          | +     | -        |
| mHD750 33  | 4-59  | 3-22 | 2  | 6  | GGPQYYYDSSGYQYYYYGMDV | 22     | 1-33  | 1  | QQYDNLQPWT  | 10     | -          | -     | -        |
| mHD750 41  | 1-69  | 3-22 | 2  | 6  | TYDSSGYYYYYGMDV       | 17     | 1-16  | 4  | QQYNSYPLT   | 9      | +          | +2    | -        |
| mHD750 44# | 1-18  | 2-21 | 3  | 4  | DVSMGVTAIPVDYFDY      | 16     | 1-5   | 4  | QQYNSYPLT   | 9      |            |       |          |
| mHD750 47  | 3-23  | 6-19 | 3  | 6  | GEGAVAGYYYYGMDV       | 16     | 2-28  | 3  | MQALQTPIT   | 9      | -          | -     | F        |
| mHD750 62  | 4-59  | 5-12 | 2  | 6  | DSGYDDPAAMDV          | 12     | 3D-15 | 2  | QQYNNWPPYT  | 10     | -          | -     | -        |
| mHD750 67# | 3-9   | 6-6  | 3  | 6  | DRGIAAPYYGMDV         | 14     | 3-20  | 5  | QQYGSSPIT   | 9      |            |       |          |
| mHD750 70  | 3-21  | 3-3  | 2  | 3  | ATVGYDFWSSGLDAFDI     | 17     | 4-1   | 4  | QQYYSTPLT   | 9      | +          | -     | -        |
| mHD750 76  | 5-51  | 3-10 | 2  | 4  | HGRIWSSGNY            | 10     | 3-11  | 4  | QQRSNWLT    | 8      | +          | -     | F        |
| mHD750 77  | 4-31  | 3-22 | 2  | 4  | GGGSSSGSPV            | 10     | 2-30  | 3  | MQGTHWPPFT  | 10     | -          | -     | -        |
| mHD750 81  | 4-39  | 4-4  | 3  | 4  | RTTVTRNGFDY           | 11     | 2-28  | 4  | MQALQTLT    | 9      | +          | +     | -        |
| mHD750 08  |       |      |    |    |                       |        | 2-28  | 1  | MQALQTPRT   | 9      |            |       |          |
| mHD750 17  |       |      |    |    |                       |        | 1-39  | 1  | QQSYSTPVT   | 9      |            |       |          |
| mHD750 23  |       |      |    |    |                       |        | 2D-29 | 4  | MQSIQLPLT   | 9      |            |       |          |
| mHD750 25  |       |      |    |    |                       |        | 1-39  | 2  | QQSYSTPYT   | 9      |            |       |          |
| mHD750 61  |       |      |    |    |                       |        | 1-5   | 2  | QQYNSYMYT   | 10     |            |       |          |
| mHD750 63  |       |      |    |    |                       |        | 3-20  | 2  | QQYGSSPLT   | 9      |            |       |          |
| mHD750 78  |       |      |    |    |                       |        | 3-20  | 4  | QQYGSSPPLT  | 10     |            |       |          |
| mHD750 82  |       |      |    |    |                       |        | 1-NL1 | 3  | QQYYSTPFT   | 9      |            |       |          |
| mHD750 90  |       |      |    |    |                       |        | 1-9   | 2  | QQLNSLYT    | 9      |            |       |          |
|            | VH    | D    | RF | JH | CDR3 (aa)             | Length | Vλ    | Jλ | CDR3 (aa)   | Length | Poly       | HEp-2 | Staining |
| mHD750 16  | 4-34  | 3-3  | 2  | 6  | SQYYDFWSGYPERDYMDV    | 19     | 3-21  | 3  | QVWDSSSVKV  | 10     | +          | +     | -        |
| mHD750 20  | 3-23  | 6-13 | 3  | 4  | MGAIAAGFDY            | 11     | 2-8   | 2  | SSYAGSNWV   | 10     | -          | -     | -        |
| mHD750 27  | 4-34  | 3-10 | 2  | 4  | AQGYGSGSYKALGFDY      | 19     | 3-21  | 3  | QVWDSSDHWV  | 11     | -          | +     | -        |
| mHD750 29  | 1-8   | /    | /  | 6  | VAYDYYYYYGMDV         | 14     | 1-44  | 2  | AAWDDSLNGVV | 11     | -          | +     | -        |
| mHD750 37  | 3-11  | 4-23 | 2  | 4  | GRYGGNSPMCY           | 11     | 6-57  | 3  | QSYDSSNHVW  | 10     | -          | -     | -        |
| mHD750 38# | 3-66  | 2-2  | 2  | 6  | DLSTSFYGMVDV          | 11     | 1-40  | 2  | QSYDSSLGTV  | 11     |            |       |          |
| mHD750 39# | 3-64  | 6-19 | 1  | 4  | EQWLGYYFDY            | 11     | 2-11  | 1  | CSYAGSYIHYV | 11     |            |       |          |
| mHD750 49  | 3-66  | 6-13 | 3  | 4  | MGLGIAAAGLDY          | 12     | 2-14  | 3  | SSYTSSTWV   | 10     | -          | -     | -        |
| mHD750 50  | 3-64  | 6-6  | 2  | 4  | GYSSSSGRDY            | 10     | 3-21  | 1  | QVWDSSSDHYV | 11     | -          | -     | -        |
| mHD750 53# | 3-11  | 3-3  | 2  | 4  | VDHDFWSGNIDY          | 12     | 1-51  | 3  | GTWDSSLSAGV | 11     |            |       |          |
| mHD750 55  | 4-34  | /    | /  | 4  | VPPGGQDY              | 8      | 3-21  | 1  | QVWDSSSDHYV | 11     | -          | -     | -        |
|            | VH    | D    | RF | JH | CDR3 (aa)             | Length |       |    |             |        |            |       |          |
| mHD750 47  | 3-23  | 6-19 | 3  | 6  | GEGAVAGYYYYGMDV       | 16     |       |    |             |        |            |       |          |
| mHD750 87  | 4-34  | 7-27 | 3  | 4  | GNPNWGFYY             | 9      |       |    |             |        |            |       |          |

RF, reading frame; #, antibody failed to be expressed

-, non-reactive; +, reactive; +2, highly reactive

c, diffuse cytoplasmic staining; A, actin staining; G, Golgi staining; M, mitochondria staining; MS, mitotic spindle staining; N, nuclear staining; F, cytoplasmic fibers



Supplemental Table 11 Repertoire and reactivity of antibodies from mature naive B cells of healthy donor 12

| Ig        | HEAVY |      |    |    |                           | LIGHT  |      |    |              |        | REACTIVITY |       |          |
|-----------|-------|------|----|----|---------------------------|--------|------|----|--------------|--------|------------|-------|----------|
|           | VH    | D    | RF | JH | CDR3 (aa)                 | Length | Vκ   | Jκ | CDR3 (aa)    | Length | Poly       | HEp-2 | Staining |
| mHD12 05# | 4-59  | 6-6  | 2  | 4  | DLAAYSMSDY                | 10     | 1-17 | 4  | LQHNSYPLT    | 9      |            |       |          |
| mHD12 07  | 4-34  | 4-17 | 3  | 4  | TLRGTVTIVGGIYYFDY         | 17     | 1-39 | 4  | QQSYSTPLT    | 9      | +          | +     | -        |
| mHD12 09  | 3-23  | 6-6  | 3  | 5  | SIAARRGRGNWFDP            | 14     | 3-20 | 1  | QQYGSSWT     | 8      | -          | +2    | -        |
| mHD12 10# | 3-23  | 4-17 | 2  | 3  | DRPVGYGDYPGDAFDI          | 17     | 4-1  | 1  | QQYYSTPRT    | 9      |            |       |          |
| mHD12 12# | 5-51  | 6-19 | 2  | 6  | RGSGWYDEIYYYYGMDV         | 17     | 2-28 | 1  | MQALQTPQT    | 9      |            |       |          |
| mHD12 16  | 1-18  | 3-10 | 3  | 4  | ASPITMVRGASDPPGGY         | 17     | 1-27 | 1  | QKYNSAPTWT   | 10     | -          | -     | -        |
| mHD12 17# | 3-30  | 2-21 | 2  | 4  | CGGKYYFDY                 | 10     | 1-8  | 4  | QQYYSYPLT    | 10     |            |       |          |
| mHD12 22# | 3-23  | 3-22 | 2  | 4  | SREYYDSSGFGCFDY           | 16     | 3-11 | 3  | QQRSNWLFT    | 9      |            |       |          |
| mHD12 26# | 3-73  | /    | /  | 4  | HQGADY                    | 6      | 4-1  | 4  | QQYYSTPLT    | 9      |            |       |          |
| mHD12 27  | 3-33  | 6-19 | 1  | 4  | DLAEQWLVSVDY              | 13     | 1-5  | 2  | QQYNSYPYT    | 9      | -          | -     | -        |
| mHD12 34  | 3-23  | /    | /  | 6  | DYEPGGYIYYGMDV            | 17     | 1-39 | 2  | QQSYSTPYT    | 9      | -          | +     | -        |
| mHD12 38  | 3-74  | 3-3  | 2  | 4  | DRDYDFWSGYYPSGY           | 15     | 1-5  | 2  | QQYNSYPYT    | 9      | -          | +     | -        |
| mHD12 39  | 5-51  | 4-17 | 2  | 4  | RGDYGDERDYFDY             | 13     | 3-20 | 2  | QQYGSSPPT    | 10     | -          | -     | -        |
| mHD12 40  | 3-30  | 6-19 | 3  | 6  | PIAVAGTVLPDV              | 12     | 1-6  | 2  | LQDYNPLT     | 9      | -          | -     | -        |
| mHD12 41# | 4-59  | 4-23 | 3  | 4  | TTVTPDYFDY                | 11     | 1-39 | 3  | QQSYSTPFT    | 9      |            |       |          |
| mHD12 42# | 3-73  | /    | /  | 4  | LGKVSTPDY                 | 9      | 3-11 | 4  | QQRSNWPLT    | 10     |            |       |          |
| mHD12 50# | 3-48  | 5-5  | 3  | 4  | ELRKTAMAFDY               | 11     | 1D-8 | 2  | QQYYSFPRT    | 9      |            |       |          |
| mHD12 51  | 3-48  | 5-12 | 2  | 4  | VPSVSGSYPFDY              | 12     | 4-1  | 4  | QQYYSTPST    | 9      | -          | -     | -        |
| mHD12 54# | 4-34  | 3-16 | 2  | 4  | GINDYVWGSYRYSGGSDY        | 19     | 3-20 | 3  | QQYGSSPRT    | 9      |            |       |          |
| mHD12 55# | 4-59  | 4-4  | 2  | 4  | LDYSNSYFDY                | 10     | 3-15 | 4  | QQYNNWPQLT   | 10     |            |       |          |
| mHD12 08  |       |      |    |    |                           |        | 1-16 | 4  | QQYNSYPLT    | 9      |            |       |          |
|           | VH    | D    | RF | JH | CDR3 (aa)                 | Length | Vλ   | Jλ | CDR3 (aa)    | Length | Poly       | HEp-2 | Staining |
| mHD12 13  | 1-18  | 3-9  | 2  | 4  | VLKAYDILTYFFQGRGGFDY      | 23     | 2-14 | 2  | SSYTSSSPV    | 10     | -          | -     | -        |
| mHD12 18# | 3-11  | /    | /  | 3  | VHHQKNRQAWGAFDI           | 15     | 3-21 | 3  | QVWSSSDHQV   | 11     |            |       |          |
| mHD12 20# | 4-34  | 3-16 | 1  | 4  | GIRAYVWGSFSY              | 12     | 1-51 | 2  | GTWSSLSAGV   | 11     |            |       |          |
| mHD12 24  | 3-23  | /    | /  | 5  | GEDTWFDP                  | 8      | 2-14 | 3  | SSYTSSSTLV   | 10     | -          | -     | -        |
| mHD12 28# | 4-59  | 5-24 | 2  | 4  | RDGYNTHRY                 | 9      | 3-21 | 2  | QVWSSSDHLV   | 12     |            |       |          |
| mHD12 33  | 3-11  | 3-22 | 2  | 3  | DIFGTDYDSSGYLAFDI         | 19     | 2-14 | 1  | SSYTSSSTLYV  | 11     | -          | -     | -        |
| mHD12 36  | 3-49  | 3-3  | 3  | 6  | GDPPKQATSIFGVVPRPEDPTLGMV | 28     | 1-40 | 2  | QSYDSSLGGDVV | 13     | +          | +2    | -        |
| mHD12 46  | 3-30  | 1-26 | 3  | 3  | AGAQTWGAFDI               | 12     | 1-44 | 3  | AAWDDSLNGVV  | 11     | -          | -     | c        |
| mHD12 49  | 4-39  | 3-3  | 3  | 2  | PIFGVVGANYWYFDL           | 15     | 2-14 | 1  | SSYTSSSPYV   | 10     | -          | +     | -        |
| mHD12 56  | 3-23  | 3-22 | 3  | 4  | DNRITTHAEFDY              | 12     | 3-1  | 2  | QAWDSSTVV    | 9      | +          | +     | -        |
| mHD12 70  | 1-18  | 3-10 | 3  | 6  | DPKPVTMVRGVLAYYYYYMDV     | 22     | 2-14 | 2  | SSYTSSSTSVV  | 11     | +          | -     | -        |
| mHD12 74# | 4-34  | /    | /  | 3  | LTDAFDI                   | 7      | 2-8  | 1  | SSYAGSNNAYV  | 11     |            |       |          |
| mHD12 14  |       |      |    |    |                           |        | 3-1  | 2  | QAWDSSTAYVV  | 11     |            |       |          |
| mHD12 15  |       |      |    |    |                           |        | 3-21 | 2  | QVWSSSDHPI   | 11     |            |       |          |
| mHD12 65  |       |      |    |    |                           |        | 3-21 | 2  | QVWSSSDHPHV  | 13     |            |       |          |
|           | VH    | D    | RF | JH | CDR3 (aa)                 | Length |      |    |              |        |            |       |          |
| mHD12 04  | 3-33  | 5-5  | 1  | 4  | EVPGAQLWEGSYFDY           | 15     |      |    |              |        |            |       |          |
| mHD12 19  | 3-23  | 2-21 | 3  | 1  | LVGWSVTAHPPGYFQH          | 16     |      |    |              |        |            |       |          |
| mHD12 21  | 3-23  | 2-21 | 3  | 4  | VAVVVTAIRGAFDY            | 15     |      |    |              |        |            |       |          |
| mHD12 25  | 3-11  | 3-3  | 3  | 4  | EAGVVIQPFYD               | 11     |      |    |              |        |            |       |          |
| mHD12 44  | 3-30  | 2-15 | 2  | 4  | EPKSHYCSGGSCHRGFFDY       | 19     |      |    |              |        |            |       |          |
| mHD12 45  | 3-33  | 1-1  | 3  | 6  | VGTTDSYYYYYMDV            | 15     |      |    |              |        |            |       |          |
| mHD12 53  | 3-13  | 3-3  | 3  | 6  | ANITIFGVSSAPYYYGMDV       | 20     |      |    |              |        |            |       |          |

RF, reading frame; #, antibody failed to be expressed

-, non-reactive; +, reactive; +2, highly reactive

c, diffuse cytoplasmic staining; A, actin staining; G, Golgi staining; M, mitochondria staining; MS, mitotic spindle staining; N, nuclear staining; F, cytoplasmic fibers

**Supplemental Table 12** Repertoire and reactivity of antibodies from mature naïve B cells of healthy donor 13

| Ig        | HEAVY  |      |    |    |                         |        | LIGHT |    |               |        |      | REACTIVITY |          |  |
|-----------|--------|------|----|----|-------------------------|--------|-------|----|---------------|--------|------|------------|----------|--|
|           | VH     | D    | RF | JH | CDR3 (aa)               | Length | Vκ    | Jκ | CDR3 (aa)     | Length | Poly | HEp-2      | Staining |  |
| mHD13 01  | 3-23   | /    | /  | 4  | GGHFDY                  | 6      | 1-8   | 1  | QQYYSYPRT     | 9      | +    | +          | N        |  |
| mHD13 03  | 3-11   | 3-10 | 3  | 4  | DFSWGVVVDY              | 9      | 3-11  | 1  | QQRSNWLWT     | 9      | -    | -          | -        |  |
| mHD13 07  | 3-7    | 3-3  | 2  | 6  | DASRYDYDFWSGYPIYYYYGMDV | 23     | 2-28  | 1  | MQALQTRT      | 8      | -    | +2         | -        |  |
| mHD13 11  | 4-30-4 | 3-10 | 3  | 5  | TQPTMVRGVIFEQGGGFDP     | 19     | 1-9   | 1  | QQLNSYPRT     | 9      | -    | +          | -        |  |
| mHD13 15  | 3-11   | 1-26 | 2  | 4  | EGFYSGSYSYDY            | 11     | 1-39  | 3  | QQSYSTPFT     | 9      | -    | -          | -        |  |
| mHD13 22  | 3-23   | 4-17 | 3  | 4  | APSPTTVNGFDY            | 12     | 3-15  | 1  | QQYNNWPLT     | 9      | -    | -          | -        |  |
| mHD13 23  | 4-4    | 4-17 | 3  | 6  | DPDRGTVTDGMDV           | 13     | 2-30  | 2  | MQGTHWLYT     | 9      | -    | -          | -        |  |
| mHD13 27  | 4-30-4 | 2-21 | 1  | 3  | VNLLWVNAFDI             | 11     | 1-39  | 2  | QQYSILYT      | 9      | -    | +          | -        |  |
| mHD13 31  | 3-9    | /    | /  | 3  | GTWRAYAYAFDAFDI         | 15     | 1-5   | 3  | QQYNGIFT      | 8      | +    | +          | -        |  |
| mHD13 34  | 3-30-3 | 3-22 | 2  | 4  | TPDYDSSGGYAN            | 13     | 4-1   | 4  | QQYYSTPPT     | 9      | -    | -          | -        |  |
| mHD13 35# | 4b     | /    | /  | 1  | DSGGR                   | 5      | 1-33  | 4  | QQYDNLPPFT    | 10     |      |            |          |  |
| mHD13 36  | 1-2    | 3-10 | 2  | 6  | DESGGYPPYYMDV           | 16     | 3-20  | 4  | QQYGGSPRLT    | 11     | -    | +          | -        |  |
| mHD13 37  | 3-9    | 1-26 | 3  | 4  | DAIVGAFGLPDY            | 12     | 1-5   | 1  | QQYNSYSPWT    | 10     | -    | +          | -        |  |
| mHD13 40κ | 3-30-3 | 6-13 | 3  | 3  | DVLGAAAPHAFDI           | 13     | 3-20  | 2  | QQYGSSPYT     | 9      | -    | -          | -        |  |
| mHD13 44  | 4-30-4 | /    | /  | 3  | DLRSRGGGSAFDI           | 14     | 1-33  | 1  | QQYDNLPT      | 8      | -    | -          | -        |  |
| mHD13 47  | 1-24   | /    | /  | 4  | SGILRGPFDY              | 10     | 3-20  | 4  | QQYGSSPPLT    | 10     | -    | -          | -        |  |
| mHD13 09  |        |      |    |    |                         |        | 1-39  | 1  | QQSYSTPPST    | 10     |      |            |          |  |
|           | VH     | D    | RF | JH | CDR3 (aa)               | Length | Vλ    | Jλ | CDR3 (aa)     | Length | Poly | HEp-2      | Staining |  |
| mHD13 05  | 4b     | 5-24 | 2  | 4  | RLGRDGYNFPFDY           | 13     | 2-23  | 1  | CSYAGSSTDNYV  | 12     | +    | +          | -        |  |
| mHD13 10  | 1-18   | 2-2  | 3  | 6  | ALQDIVVPAAPYMDV         | 16     | 2-14  | 3  | SSYTSSSTLWV   | 11     | -    | -          | -        |  |
| mHD13 13  | 3-30   |      |    | 3  | EQPRLGDDAFDI            | 12     | 3-25  | 2  | QSADSSSGTYRVV | 12     | -    | -          | -        |  |
| mHD13 16  | 1-24   | 3-22 | 2  | 5  | AVDSSGYLLTPPGASRWFPD    | 21     | 3-21  | 1  | QVWDSSSDHQV   | 11     | -    | +2         | -        |  |
| mHD13 26  | 3-30   | 3-3  | 3  | 6  | DPMYYLVFGVALPDYYYYMDV   | 21     | 1-51  | 2  | GTWDSLSAVV    | 11     | +    | +          | -        |  |
| mHD13 40λ |        |      |    |    | see kappa               |        | 2-23  | 2  | CSYAGSSTFVV   | 11     | -    | -          | -        |  |
| mHD13 41  | 3-11   | 2-2  | 3  | 4  | DSRSDLIVVPAAADY         | 16     | 3-21  | 2  | QVWDSSSDHV    | 11     | -    | -          | -        |  |
| mHD13 48  | 4-39   | 5-5  | 2  | 6  | SIHSYSLDLVDYYGMDV       | 17     | 3-1   | 2  | QAWDSSTVV     | 9      | -    | -          | -        |  |
| mHD13 33  |        |      |    |    |                         |        | 3-1   | 2  | QAWDSSTVV     | 9      |      |            |          |  |

RF, reading frame; #, antibody failed to be expressed

-, non-reactive; +, reactive; +2, highly reactive

c, diffuse cytoplasmic staining; A, actin staining; G, Golgi staining; M, mitochondria staining; MS, mitotic spindle staining; N, nuclear staining; F, cytoplasmic fibers

Supplemental Table 13 Repertoire and reactivity of antibodies from mature naive B cells of healthy donor P7

| Ig        | HEAVY  |      |    |    |                      | LIGHT  |       |    |              |        | REACTIVITY |       |          |
|-----------|--------|------|----|----|----------------------|--------|-------|----|--------------|--------|------------|-------|----------|
|           | VH     | D    | RF | JH | CDR3 (aa)            | Length | Vκ    | Jκ | CDR3 (aa)    | Length | Poly       | HEp-2 | Staining |
| mHDP7 49  | 4-34   | 2-21 | 2  | 4  | GGGDCGDCYSSYFDY      | 16     | 1-5   | 2  | QQYNSYPYT    | 9      | -          | +     | -        |
| mHDP7 52  | 1-3    | 6-13 | 3  | 5  | TLAAGTREFDP          | 12     | 4-1   | 4  | QQYYSTLPT    | 9      | -          | +     | -        |
| mHDP7 55  | 4-34   | 5-12 | 2  | 5  | GYGGYSGYDQRWFDP      | 15     | 3-20  | 5  | QQYGSSPIT    | 9      | -          | -     | -        |
| mHDP7 56  | 3-30-3 | 3-10 | 2  | 5  | DSIFYGSGSPYRRNWFDP   | 18     | 1-12  | 4  | QQANSFPLT    | 9      | +          | +     | -        |
| mHDP7 57  | 4-30-4 | 3-10 | 2  | 6  | ENRPREYYGSGEGYYYGMDV | 23     | 2-28  | 3  | MQALQTPFT    | 9      | -          | -     | -        |
| mHDP7 58  | 3-11   | 3-10 | 2  | 4  | DARRGSGSYRGGVGY      | 15     | 3-11  | 1  | QQRSNWPGT    | 9      | +          | +2    | N        |
| mHDP7 60# | 1-69   | 5-12 | 3  | 4  | DQSPIVATRNGLDY       | 14     | 1-17  | 1  | LQHNSYPRT    | 9      |            |       |          |
| mHDP7 61  | 3-23   | 4-17 | 2  | 4  | LTRTPNDYGDYGVFDY     | 16     | 3-20  | 1  | QQYGSSPPT    | 9      | -          | -     | -        |
| mHDP7 62  | 4-31   | 2-21 | 2  | 4  | RGGPYCGGDCSIDY       | 14     | 1-9   | 4  | QQLNSYPLT    | 9      | -          | +     | -        |
| mHDP7 63  | 3-53   | 3-9  | 2  | 3  | ASLTGYKDAFDI         | 12     | 1D-12 | 2  | QQANSFPYT    | 9      | -          | -     | -        |
| mHDP7 64  | 3-49   | 6-19 | 3  | 5  | DRIAVAGGANWFDP       | 14     | 1-12  | 4  | QQANSFPLT    | 9      | -          | -     | -        |
| mHDP7 65# | 1-18   | 1-26 | 3  | 4  | GIVGANQADDY          | 11     | 2D-29 | 3  | MQSIQLPFT    | 9      |            |       |          |
| mHDP7 70κ | 3-48   | 3-9  | 2  | 4  | VGRFGRGYDILTGYHYH    | 17     | 2-28  | 5  | MQALQTPEGT   | 10     | -          | -     | -        |
| mHDP7 72  | 3-48   | 1-26 | 3  | 4  | FLGIVGALYDY          | 11     | 3-15  | 1  | QQYNNWPSWT   | 10     | +          | -     | -        |
| mHDP7 78  | 4-4    | 3-22 | 2  | 4  | DDSSGYNY             | 9      | 3-20  | 3  | QQYGSSPQT    | 9      | -          | -     | c        |
| mHDP7 79  | 3-11   | 3-9  | 2  | 2  | SRRYDILTYGYNVGLWYFDL | 21     | 1-5   | 2  | QQYNSYSVP    | 9      | +2         | +     | -        |
| mHDP7 80  | 3-49   | 1-26 | 2  | 4  | DSPPSGYSRSLHY        | 13     | 1-39  | 3  | QQYSTPFT     | 9      | -          | -     | -        |
| mHDP7 84  | 3-33   | 6-19 | 3  | 4  | DSHSIAVAAMGY         | 12     | 3-20  | 3  | QQYGSSPFT    | 9      | -          | -     | -        |
| mHDP7 85# | 3-30   | 3-3  | 2  | 4  | DVRFWSGYFFDY         | 12     | 3-20  | 1  | QQYGSSRGWT   | 10     |            |       |          |
| mHDP7 88  | 6-1    | 5-12 | 2  | 6  | DLHLSGYDPHYYYYGMDV   | 19     | 3-20  | 2  | QQYGSSPSYT   | 10     | -          | +     | -        |
| mHDP7 94# | 1-69   | 5-12 | 2  | 4  | GHYSGYDFTHYFDY       | 14     | 4-1   | 2  | QQYSTPPT     | 9      |            |       |          |
| mHDP7 92  |        |      |    |    |                      |        | 3-15  | 1  | QQYNNWPPWT   | 10     |            |       |          |
|           | VH     | D    | RF | JH | CDR3 (aa)            | Length | Vλ    | Jλ | CDR3 (aa)    | Length | Poly       | HEp-2 | Staining |
| mHDP7 51  | 4-34   | 6-13 | 3  | 5  | GEIAASGTRWFDP        | 13     | 1-51  | 2  | GTWDSLSAVV   | 11     | -          | -     | -        |
| mHDP7 54  | 3-33   | 3-10 | 1  | 5  | DLWFRDPTKFDP         | 12     | 2-14  | 2  | SSYTSSSTVV   | 10     | -          | -     | -        |
| mHDP7 59  | 3-11   | /    | /  | 5  | DFSGNGWFDP           | 10     | 2-14  | 1  | SSYTSGSTPYV  | 11     | -          | -     | -        |
| mHDP7 66  | 3-23   | 4-23 | 2  | 6  | DRDYDYNTPPTRYGMDV    | 18     | 2-14  | 1  | SSYTSSSTLHV  | 11     | -          | -     | -        |
| mHDP7 68# | 3-53   | /    | /  | 4  | DDY                  | 3      | 2-14  | 3  | SSYTSSS      | 7      |            |       |          |
| mHDP7 69  | 1-69   | /    | /  | 5  | GASRFPQEEGADNWFDP    | 17     | 1-47  | 3  | AAWDDSLSGWV  | 11     | +          | -     | -        |
| mHDP7 70λ |        |      |    |    | see kappa            |        | 2-23  | 3  | CSYAGSSTWV   | 10     | +          | +2    | c+N      |
| mHDP7 71  | 3-9    | 6-19 | 3  | 5  | DRSIAVAGEFDP         | 12     | 2-14  | 2  | RSYTSSSTVV   | 10     | -          | +     | c        |
| mHDP7 73  | 3-30   | 4-17 | 2  | 4  | DSPIVYGDYGPLDY       | 14     | 3-25  | 2  | QSADSSGTYKVV | 12     | -          | +     | -        |
| mHDP7 81  | 1-18   | 2-2  | 3  | 6  | DLVVVPAAFMDV         | 12     | 2-11  | 3  | CSYAGSYTFGV  | 11     | -          | -     | -        |
| mHDP7 90# | 3-30-3 | 2-8  | 2  | 4  | EDCTNGVCQAGRVIDY     | 16     | 2-23  | 3  | CSYAGSSTWV   | 10     |            |       |          |
| mHDP7 93# | 3-33   | /    | /  | 4  | WDFDY                | 5      | 2-8   | 3  | SSYAGSNN     | 8      |            |       |          |
| mHDP7 95# | 5-51   | 3-22 | 3  | 5  | GSSPGTMIVGNFDP       | 14     | 1-44  | 1  | AAWDDSLNGSYV | 12     |            |       |          |

RF, reading frame; #, antibody failed to be expressed

-, non-reactive; +, reactive; +2, highly reactive

c, diffuse cytoplasmic staining; A, actin staining; G, Golgi staining; M, mitochondria staining; MS, mitotic spindle staining; N, nuclear staining; F, cytoplasmic fibers

**Supplemental Table 14** Repertoire and reactivity of antibodies from mature naive B cells of healthy donor 1191

| Ig          | HEAVY |      |    |    |                        |        | LIGHT |    |              |        | REACTIVITY |       |          |
|-------------|-------|------|----|----|------------------------|--------|-------|----|--------------|--------|------------|-------|----------|
|             | VH    | D    | RF | JH | CDR3 (aa)              | Length | Vκ    | Jκ | CDR3 (aa)    | Length | Poly       | HEp-2 | Staining |
| mHD1191 52  | 1-18  | /    | /  | 4  | RGLYFDY                | 7      | 3-11  | 1  | QQRSNWWT     | 8      | -          | -     | -        |
| mHD1191 53  | 3-15  | 3-3  | 1  | 5  | SGGELEWLLQYNWFDP       | 16     | 3-11  | 2  | QQRSNWYT     | 8      | -          | -     | -        |
| mHD1191 57  | 1-69  | 3-9  | 1  | 6  | DRLGGIRYFDPMDV         | 14     | 1-39  | 2  | QQSYSTPRT    | 9      | +          | +     | -        |
| mHD1191 58  | 1-69  | 2-15 | 3  | 4  | VVVVAATSPFGD           | 12     | 1-39  | 4  | QQSYSTPLT    | 9      | +          | +     | -        |
| mHD1191 59  | 5-a   | 5-12 | 2  | 5  | HRGYSGYYQNWFDP         | 14     | 1-33  | 4  | QQYDNLPLT    | 9      | -          | -     | -        |
| mHD1191 63# | 3-64  | 4-4  | 2  | 4  | ANSNYWGPYFDY           | 12     | 1-39  | 4  | VEIKRTVAA    | 9      |            |       |          |
| mHD1191 64  | 1-69  | 3-3  | 2  | 5  | EGYYDFWSGAFSRGANWFDP   | 20     | 1-39  | 1  | QQSYSTLRT    | 9      | +          | +     | -        |
| mHD1191 71# | 5-a   | 4-23 | 2  | 4  | SDGGSVGI               | 9      | 1-17  | 2  | LQHNDYPPT    | 9      |            |       |          |
| mHD1191 72  | 1-69  | /    | /  | 6  | GLGTHGHNPVRWGMDV       | 16     | 3-15  | 1  | QQYNNWPPT    | 9      | +          | +     | -        |
| mHD1191 75  | 3-23  | 6-13 | 3  | 4  | VDPAAGILSGFDY          | 14     | 2-30  | 4  | MQGTHWPPLT   | 10     | -          | -     | -        |
| mHD1191 78# | 3-7   | 3-3  | 2  | 6  | GGGGYDFWSGYSLYYYYYGMDV | 22     | 1-5   | 1  | QQYNSYPWT    | 9      |            |       |          |
| mHD1191 80  | 3-33  | 2-21 | 2  | 4  | DYWAYCGGDCYPDY         | 14     | 2-30  | 4  | MQGTHWPLT    | 9      | -          | +     | -        |
| mHD1191 82  | 3-30  | /    | /  | 4  | DKEGNILDY              | 9      | 4-1   | 4  | QQYYSTPPS    | 9      | -          | -     | -        |
| mHD1191 83  | 1-69  | 3-10 | 2  | 4  | SRPYYYGSGSYTPEAY       | 17     | 1-33  | 4  | QQYDNLPT     | 8      | -          | +     | c        |
| mHD1191 84  | 4-31  | 2-8  | 1  | 4  | TPVRYTLYHYFDY          | 13     | 1-39  | 3  | QQSYSTPPRFT  | 11     | +          | +     | -        |
| mHD1191 86  | 3-23  | 4-17 | 2  | 4  | GGDYEKFDY              | 9      | 3-15  | 2  | QQYFFAAA     | 8      | -          | -     | -        |
| mHD1191 93  | 4-59  | 6-19 | 1  | 4  | MKQWLWVDY              | 9      | 1-39  | 4  | QQSYSTPT     | 8      | -          | +     | c        |
|             | VH    | D    | RF | JH | CDR3 (aa)              | Length | Vλ    | Jλ | CDR3 (aa)    | Length | Poly       | HEp-2 | Staining |
| mHD1191 51  | 1-46  | 4-17 | 3  | 6  | ATVTTHLYYYGMDV         | 14     | 3-1   | 2  | QAWDSSTHVV   | 10     | -          | +     | F        |
| mHD1191 60  | 1-69  | 3-22 | 2  | 4  | QGHYYDSSGYRRGFDY       | 17     | 2-23  | 3  | CSYAGSSSWV   | 8      | 2+         | +     | -        |
| mHD1191 70# | 3-11  | 3-10 | 1  | 6  | ERRWEWFGELFLYYYGMDV    | 19     | 2-23  | 3  | CSYAGSSV     | 8      |            |       |          |
| mHD1191 73  | 3-33  | 6-6  | 3  | 6  | ATRIAARPQRRTYYYGMDV    | 20     | 3-1   | 2  | QAWDSSTANVV  | 11     | 2+         | 2+    | N        |
| mHD1191 74  | 1-24  | 1-26 | 1  | 4  | TLEWELLSYFDY           | 12     | 3-25  | 2  | QSADSSGTYRVV | 12     | -          | +     | -        |
| mHD1191 81  | 4-59  | 3-10 | 2  | 3  | GGSGKGVNAFDI           | 12     | 3-21  | 1  | QVWDSSSDLYV  | 11     | -          | -     | -        |
| mHD1191 85  | 3-21  | 5-24 | 3  | 6  | VKEEMATIEEPIEDYYYYGMDV | 23     | 2-23  | 2  | CSYAGSSTHVV  | 11     | -          | -     | -        |
| mHD1191 87  | 5-a   | 2-15 | 2  | 4  | HDTFGPYCSGGSCFPPNDY    | 19     | 3-1   | 1  | QAWDSSTGV    | 9      | -          | -     | -        |
| mHD1191 91  | 4-34  | 3-22 | 2  | 4  | GRPRGVYDSSGYFYFDY      | 17     | 2-14  | 1  | SSYTSSTLV    | 10     | -          | -     | -        |
| mHD1191 92# | 1-69  | 3-22 | 2  | 4  | YYDSSGYRFDY            | 12     | 3-1   | 2  | QAWDSSTA     | 8      |            |       |          |
|             | VH    | D    | RF | JH | CDR3 (aa)              | Length |       |    |              |        |            |       |          |
| mHD1191 54  | 1-3   | 3-22 | 2  | 4  | ASYDSSGYLSY            | 11     |       |    |              |        |            |       |          |
| mHD1191 55  | 4-4   | 2-15 |    | 4  | RISSRNFFDY             | 10     |       |    |              |        |            |       |          |
| mHD1191 67  | 3-33  | 6-19 | 1  | 4  | DPGQWLKKEFDY           | 12     |       |    |              |        |            |       |          |

RF, reading frame; #, antibody failed to be expressed

-, non-reactive; +, reactive; +2, highly reactive

c, diffuse cytoplasmic staining; A, actin staining; G, Golgi staining; M, mitochondria staining; MS, mitotic spindle staining; N, nuclear staining; F, cytoplasmic fibers

**Supplemental Table 15** Repertoire and reactivity of antibodies from mature naive B cells of healthy donor P4

| Ig        | HEAVY  |      |    |    |                        |        | LIGHT |    |              |        | REACTIVITY |       |          |
|-----------|--------|------|----|----|------------------------|--------|-------|----|--------------|--------|------------|-------|----------|
|           | VH     | D    | RF | JH | CDR3 (aa)              | Length | Vκ    | Jκ | CDR3 (aa)    | Length | Poly       | HEp-2 | Staining |
| mHDP4 49  | 3-64   | 4-23 | 2  | 4  | DNDYAHY                | 7      | 2-30  | 1  | MQGTHWPPWT   | 10     | -          | -     | -        |
| mHDP4 50  | 1-46   | 1-26 | 3  | 5  | LGAASRGPPFPD           | 12     | 3-20  | 5  | QQYGSSPIT    | 9      | -          | +     | -        |
| mHDP4 61# | 4-39   | /    | /  | 3  | HEEAAGANAFDI           | 12     | 1-39  | 2  | QQSYSTPPT    | 9      |            |       |          |
| mHDP4 63  | 3-64   | 5-5  | 2  | 4  | DHGYSYGYASFDY          | 13     | 1-33  | 4  | QQYDNLPLT    | 9      | -          | -     | -        |
| mHDP4 65  | 1-69   | 7-27 | 1  | 4  | VLGYDFDY               | 8      | 1-12  | 2  | QQANSFPR     | 9      | +          | +     | -        |
| mHDP4 67  | 3-33   | 1-26 | 3  | 4  | AGATGTLDY              | 9      | 2-30  | 2  | MQGTHWPPT    | 9      | -          | +     | -        |
| mHDP4 68  | 3-15   | 3-10 | 2  | 6  | NIWFGYYYYYGM           | 15     | 3-11  | 4  | QQRSNWPPLT   | 10     | +          | +2    | c        |
| mHDP4 70  | 3-30   | /    | /  | 6  | CPYAEFAYGMHL           | 13     | 2-28  | 2  | MQALQTPYT    | 9      | +          | +     | -        |
| mHDP4 76  | 3-23   | 2-2  | 2  | 4  | DRGYCSSTSCYFLFDY       | 16     | 3-11  | 4  | QQRSNWPPT    | 9      | -          | +     | -        |
| mHDP4 79  | 4-34   | 2-2  | 3  | 5  | IVPAALPFDP             | 10     | 1-39  | 2  | QQSYSTPYT    | 9      | -          | +     | -        |
| mHDP4 86  | 4-34   | 4-23 | 2  | 6  | WSLRFYNSRKYGGMDV       | 18     | 1-39  | 4  | QQSYSTPRT    | 9      | +          | -     | c        |
| mHDP4 88κ | 4-31   | 6-13 | 2  | 4  | EGEFSSSRAGTLQY         | 15     | 1-5   | 1  | QQYNSYSAT    | 9      | -          | -     | -        |
| mHDP4 90  | 3-30   | 5-12 | 3  | 6  | DLVATIRGTGFGVYGGMDV    | 20     | 3-15  | 3  | QQYNNWPPT    | 9      | +          | +     | -        |
| mHDP4 91  | 3-21   | 6-13 | 1  | 4  | DRQQLVQFELGY           | 12     | 1-33  | 5  | QQYDNLPI     | 9      | -          | -     | -        |
| mHDP4 92# | 3-21   | 6-19 | 2  | 4  | ESGWSRVPVGGWFPM        | 18     | 1-27  | 2  | QKYNAPYT     | 9      |            |       |          |
| mHDP4 93  | 4-30-4 | 4-17 | 3  | 5  | EIPPTVTTSFGDP          | 14     | 1-6   | 1  | LQDYNYPGT    | 9      | -          | -     | -        |
| mHDP4 94  | 1-3    | 3-3  | 2  | 6  | ESYDFWSGYGGMDV         | 18     | 3D-15 | 1  | QQYNNWPPWT   | 10     | +          | +     | c+N      |
| mHDP4 62  |        |      |    |    |                        |        | 3-20  | 2  | QQYGSSPYT    | 9      |            |       |          |
|           | VH     | D    | RF | JH | CDR3 (aa)              | Length | Vλ    | Jλ | CDR3 (aa)    | Length | Poly       | HEp-2 | Staining |
| mHDP4 54# | 3-7    | 3-9  | 2  | 4  | DPPYYDILTGYFLYSVDY     | 19     | 2-14  | 2  | SSYTSSTLVV   | 11     |            |       |          |
| mHDP4 60  | 3-73   | 5-5  | 3  | 4  | LDTANTFDY              | 9      | 3-25  | 2  | QSADSSGYVV   | 11     | -          | -     | -        |
| mHDP4 66  | 3-49   | /    | /  | 4  | DPPPPWTNYEDTRGY        | 15     | 1-47  | 1  | AAWDDSLSGPV  | 11     | -          | +     | -        |
| mHDP4 69  | 5-51   | 3-22 | 2  | 5  | HWAHYDSSGYASNWFDP      | 18     | 2-14  | 3  | SSYTSSTLVV   | 11     | -          | -     | -        |
| mHDP4 71  | 3-30   | /    | /  | 4  | HVALAFDY               | 8      | 3-10  | 1  | YSTDSSGNHFYV | 12     | +          | +     | -        |
| mHDP4 73# | 5-A    | 2-15 | 2  | 4  | VACSGGSCYFRLAGYFDY     | 18     | 1-47  | 2  | AAWDDSLSGVV  | 11     |            |       |          |
| mHDP4 75  | 1-18   | 4-17 | 2  | 4  | ASGDYDHDFD             | 10     | 2-14  | 2  | SSYTSTRTLV   | 10     | -          | -     | -        |
| mHDP4 80  | 3-15   | 1-26 | 1  | 4  | AFFNMWELYYFDY          | 13     | 1-47  | 2  | AAWDDSLSALV  | 11     | -          | -     | -        |
| mHDP4 81# | 1-46   | /    | /  | 6  | VLLQYYYYGMDV           | 12     | 3-1   | 1  | QAWDSSYV     | 9      |            |       |          |
| mHDP4 82  | 3-23   | /    | /  | 6  | GPAGVYYYYGLDV          | 13     | 1-51  | 3  | GTWDSSLSAGV  | 11     | -          | -     | -        |
| mHDP4 88λ |        |      |    |    | see kappa              |        | 4-69  | 3  | QTWGTGIL     | 8      | -          | -     | -        |
| mHDP4 95  | 3-21   | 3-10 | 2  | 4  | ALGWEYNYGDFDY          | 13     | 2-14  | 2  | SSYTSSTLDVV  | 12     | -          | -     | -        |
|           | VH     | D    | RF | JH | CDR3 (aa)              | Length |       |    |              |        |            |       |          |
| mHDP4 51  | 1-18   | 2-15 | 3  | 6  | DSVVVAATLLDYGGMDV      | 20     |       |    |              |        |            |       |          |
| mHDP4 64  | 1-18   | 6-13 | 2  | 6  | DGGREDSSWFYYYYGMDV     | 21     |       |    |              |        |            |       |          |
| mHDP4 72  | 3-21   | 3-10 | 1  | 6  | DFGILLWFGELPSQYYYYGMDV | 22     |       |    |              |        |            |       |          |
| mHDP4 85  | 3-30-3 | 5-12 | 3  | 4  | DHGLGGSDIVATIDASYFDY   | 21     |       |    |              |        |            |       |          |

RF, reading frame; #, antibody failed to be expressed

-, non-reactive; +, reactive; +2, highly reactive

c, diffuse cytoplasmic staining; A, actin staining; G, Golgi staining; M, mitochondria staining; MS, mitotic spindle staining; N, nuclear staining; F, cytoplasmic fibers

**Supplemental Table 16** Repertoire and reactivity of antibodies from mature naïve B cells of healthy donor 138

| Ig          | HEAVY  |      |    |    |                        | LIGHT  |      |    |               |        | REACTIVITY |       |          |
|-------------|--------|------|----|----|------------------------|--------|------|----|---------------|--------|------------|-------|----------|
|             | VH     | D    | RF | JH | CDR3 (aa)              | Length | Vκ   | Jκ | CDR3 (aa)     | Length | Poly       | HEp-2 | Staining |
| mHD138 01#  | 3-15   | 5-5  | 3  | 3  | RLYTAMGPIDAFDI         | 14     | 1-33 | 4  | QQYDNLPLT     | 9      |            |       |          |
| mHD138 02   | 3-30-3 | 3-10 | 1  | 5  | DNLWFGELLGWFD          | 14     | 4-1  | 1  | QQYYSTPWT     | 9      | -          | -     | -        |
| mHD138 03#  | 3-33   | 3-9  | 1  | 3  | ASLRYFDWLLGVDAFDI      | 17     | 1-13 | 5  | QQFNYSYPT     | 9      |            |       |          |
| mHD138 04   | 1-46   | 3-10 | 3  | 5  | DPRDVF T MVRGKVGGNWFDP | 20     | 4-1  | 2  | QQYYSTPPT     | 9      | +          | +     | -        |
| mHD138 05   | 3-74   | 3-10 | 2  | 4  | VVGSFSFDY              | 9      | 4-1  | 4  | QQYYSTPLT     | 9      | -          | -     | -        |
| mHD138 08κ# | 3-9    | 3-22 | 2  | 4  | DPLSYRYYYDSSGYPYFDY    | 20     | 2-40 | 2  | MQRIEFPSYT    | 10     |            |       |          |
| mHD138 09   | 3-30   | 3-22 | 2  | 4  | DFNDSSGLTDY            | 11     | 3-15 | 4  | QQYNNWPLT     | 10     | -          | -     | -        |
| mHD138 12   | 3-11   | 1-26 | 1  | 5  | EGELAGEGFDP            | 11     | 2-28 | 3  | MQALQTPLFT    | 10     | -          | -     | -        |
| mHD138 13   | 1-18   | 6-13 | 2  | 3  | DGYSSSWPNPDAFDI        | 15     | 3-11 | 5  | QQRSNWPPST    | 10     | -          | +     | -        |
| mHD138 17#  | 1-69   | 3-3  | 3  | 6  | EPGITIFGVVIQGPEDYGGMDV | 24     | 1-13 | 4  | QQFNYSYPT     | 10     |            |       |          |
| mHD138 19#  | 3-30   | 7-27 | 3  | 3  | EWGTGGDAFDI            | 11     | 1-12 | 2  | QQANSFPYT     | 9      |            |       |          |
| mHD138 20   | 3-74   | 1-26 | 1  | 4  | SWEHLDY                | 7      | 1-17 | 1  | LQHNYSYPWT    | 9      | -          | +     | -        |
| mHD138 23   | 4-39   | 4-23 | 2  | 5  | GSSVGYGGNSGWFD         | 15     | 3-20 | 4  | QQYSSSPLT     | 9      | -          | -     | -        |
| mHD138 25#  | 3-23   | 3-3  | 2  | 4  | QYYDFWSGYAELGY         | 15     | 2-24 | 2  | MQATQFPYT     | 9      |            |       |          |
| mHD138 27   | 4-61   | 3-22 | 2  | 3  | EGSDSYDSSGYSNDAFDI     | 19     | 3-20 | 1  | QQYSSSPT      | 9      | -          | -     | -        |
| mHD138 32   | 3-21   | 6-13 | 2  | 4  | DSFTEISWYEAHYFDY       | 16     | 3-11 | 1  | QQRSNWPPWT    | 10     | -          | +     | -        |
| mHD138 33   | 1-69   | 1-26 | 3  | 5  | LVGATYNWFDP            | 11     | 1-12 | 3  | QQANSFPRT     | 9      | +          | +2    | -        |
| mHD138 34   | 3-15   | 3-9  | 2  | 6  | DLVQNYDILTGYMRYGGMDV   | 21     | 2-30 | 2  | MQGTHWLRT     | 9      | +          | +2    | -        |
| mHD138 35   | 3-23   | 5-5  | 2  | 3  | AGRGYSYGGKNDAFDI       | 16     | 3-20 | 4  | QQYSSSRLT     | 9      | -          | +     | -        |
| mHD138 36κ  | 3-74   | 1-26 | 2  | 4  | AGGSYPGGY              | 9      | 2-28 | 1  | MQALQTPWT     | 9      | -          | +     | -        |
| mHD138 44   | 3-21   | 6-6  | 3  | 6  | VLIATLRMNDYGGMDV       | 17     | 1-39 | 2  | QQSYSTPYT     | 9      | -          | +     | F        |
| mHD138 45#  | 3-48   | 3-9  | 2  | 6  | LGPGLTGYSSYGGMDV       | 19     | 2-28 | 4  | MQALQPLT      | 9      |            |       |          |
| mHD138 47   | 3-30   | 6-19 | 3  | 4  | DRVAVGGGADY            | 11     | 1-27 | 3  | QKYNAPFT      | 9      | -          | +     | -        |
| mHD138 07   |        |      |    |    |                        |        | 1-5  | 2  | QQYNSYSGT     | 9      |            |       |          |
|             | VH     | D    | RF | JH | CDR3 (aa)              | Length | Vλ   | Jλ | CDR3 (aa)     | Length | Poly       | HEp-2 | Staining |
| mHD138 08λ# |        |      |    |    | see kappa              |        | 1-51 | 1  | GTWDSSLSAYV   | 11     |            |       |          |
| mHD138 10   | 1-46   | 2-2  | 1  | 4  | VWRRQLPDY              | 10     | 1-51 | 2  | GTWDSSLSAVV   | 11     | -          | -     | -        |
| mHD138 11   | 3-48   | 2-8  | 3  | 3  | ISSQNIVLIPKGAFDI       | 16     | 2-14 | 1  | SSYTSSSLGV    | 10     | +          | +     | -        |
| mHD138 14   | 3-23   | 3-22 | 2  | 3  | WEYYDSSGYIEDAFDI       | 16     | 1-44 | 1  | AAWDDSLNGKV   | 11     | -          | -     | -        |
| mHD138 15   | 4-39   | /    | /  | 4  | EVSGEINDY              | 9      | 4-69 | 3  | QTWGTGIQV     | 9      | -          | -     | -        |
| mHD138 16   | 3-33   | 6-13 | 2  | 3  | DRGYSSWYMDI            | 12     | 2-14 | 3  | SSYTSSSTWV    | 10     | -          | -     | -        |
| mHD138 28   | 3-48   | 4-23 | 2  | 3  | DLDYGGNSDAFDI          | 13     | 3-21 | 3  | QVWSSSDHWV    | 11     | -          | -     | -        |
| mHD138 29   | 4-30-4 | 2-2  | 2  | 4  | APLHCSSTSCYTVLFDY      | 17     | 1-51 | 3  | GTWDSSLSAGHWV | 13     | -          | -     | -        |
| mHD138 31   | 1-69   | 2-2  | 3  | 4  | GEDVVPAATYYFDY         | 16     | 2-11 | 3  | CSYAGSSYVW    | 10     | +          | +     | -        |
| mHD138 36λ  |        |      |    |    | see kappa              |        | 8-61 | 3  | VLYMGSIWV     | 10     | +          | +     | -        |
| mHD138 38   | 4-4    | 2-8  | 2  | 6  | DAPGYCTNGVCSQGYMDV     | 19     | 3-10 | 3  | YSTDSSGNHRV   | 11     | -          | -     | -        |
| mHD138 46   | 3-30   | 3-3  | 2  | 4  | DNERVRYDFWSGYLFDY      | 18     | 3-21 | 3  | QVWSSSDHPNWW  | 13     | -          | -     | -        |
| mHD138 06   |        |      |    |    |                        |        | 3-25 | 2  | QSADSSGTYV    | 11     |            |       |          |
| mHD138 24   |        |      |    |    |                        |        | 3-9  | 2  | QVWSSSTHVV    | 10     |            |       |          |

RF, reading frame; #, antibody failed to be expressed

-, non-reactive; +, reactive; +2, highly reactive

c, diffuse cytoplasmic staining; A, actin staining; G, Golgi staining; M, mitochondria staining; MS, mitotic spindle staining; N, nuclear staining; F, cytoplasmic fibers

**Supplemental Table 17** Repertoire and reactivity of antibodies from mature naive B cells of healthy donor 535

| Ig         | HEAVY |      |    |    |                        |        | LIGHT |    |              |        |      | REACTIVITY |          |  |
|------------|-------|------|----|----|------------------------|--------|-------|----|--------------|--------|------|------------|----------|--|
|            | VH    | D    | RF | JH | CDR3 (aa)              | Length | Vκ    | Jκ | CDR3 (aa)    | Length | Poly | HEp-2      | Staining |  |
| mHD535 14  | 3-30  | 3-10 | 3  | 6  | DIVVRVLWYYGMDV         | 15     | 2-28  | 4  | MQALQTPLT    | 9      | +    | +          | -        |  |
| mHD535 18  | 3-30  | 4-17 | 2  | 4  | DSLGDYSIFDY            | 11     | 3-15  | 1  | QQYNNWPPWT   | 10     | -    | +          | -        |  |
| mHD535 21  | 1-2   | 4-17 | 2  | 6  | ARDDYGDYEGMDV          | 13     | 1-39  | 2  | QQSYSTPYT    | 9      | -    | -          | -        |  |
| mHD535 26  | 3-11  | 1-26 | 2  | 6  | ESGSYYPARGEKTPPTPYGMDV | 23     | 2-28  | 4  | MQALQTPRT    | 9      | -    | -          | -        |  |
| mHD535 31  | 1-69  | 6-13 | 3  | 3  | GGEAAAGLKAFDI          | 13     | 3-11  | 2  | QQRSNWPPGMYS | 12     | +    | +          | -        |  |
| mHD535 35  | 3-30  | /    | /  | 4  | DRDRVRRGENEPADY        | 15     | 3-15  | 3  | QQYNNWPPRIT  | 11     | -    | +          | N        |  |
| mHD535 39  | 1-69  | 3-10 | 2  | 4  | VPLGYGSGSYNPFYD        | 17     | 2-28  | 3  | MQALQTPL     | 8      | +    | +          | -        |  |
| mHD535 40  | 4-39  | 2-15 | 3  | 4  | TSSPDIVVVAREALREFDY    | 20     | 3-11  | 4  | QQRSNWPRLT   | 10     | +    | +          | -        |  |
| mHD535 43κ | 4-39  | 6-13 | 3  | 5  | CAAAGTRWFDP            | 11     | 1-39  | 3  | QQSYSTPDT    | 9      | -    | -          | -        |  |
| mHD535 45  | 3-23  | 6-13 | 2  | 4  | HLWDGYSSSWYFDY         | 14     | 3-11  | 3  | QQRSNWPPIFT  | 11     | +    | +          | c        |  |
| mHD535 47  | 3-7   | 3-22 | 2  | 6  | VEYYDSSQEDV            | 11     | 1-39  | 3  | QQSYSTPRT    | 9      | +    | +          | -        |  |
| mHD535 54# | 1-58  | 3-22 | 2  | 4  | SSEGEDSSGYSSGG         | 14     | 3-15  | 2  | QQYNNWPPYS   | 10     |      |            |          |  |
| mHD535 57  | 3-9   | /    | /  | 6  | DSNGMDV                | 7      | 4-1   | 2  | QQYYSTPYS    | 9      | -    | -          | -        |  |
| mHD535 58  | 3-21  | 3-16 | 3  | 3  | DGVMITFGGVIVRLGAFDI    | 19     | 3-20  | 2  | QQYGSSPRT    | 9      | +    | +          | c        |  |
| mHD535 62  | 4-4   | /    | /  | 3  | PGAFDI                 | 6      | 1-39  | 1  | QQSYSTPRT    | 9      | -    | -          | -        |  |
| mHD535 66# | 4-39  | 3-9  | 2  | 4  | GNILTGYHVLPGAYFDY      | 18     | 3-20  | 4  | QQYGSSRLT    | 9      |      |            |          |  |
| mHD535 68  | 3-30  | /    | /  | 6  | DRGGGMDV               | 8      | 1-39  | 4  | QQSYSTSLT    | 9      | -    | -          | -        |  |
| mHD535 69  | 3-15  | 5-5  | 1  | 4  | ESPIQLWTSYYFDY         | 14     | 1-5   | 1  | QQYNSYSRT    | 9      | +    | +          | -        |  |
| mHD535 80  | 3-23  | 2-2  | 3  | 4  | VNRVVPVTYFDY           | 13     | 3-20  | 4  | QQYGSSPLT    | 9      | -    | -          | -        |  |
| mHD535 90  | 3-21  | 3-10 | 1  | 4  | GAQWFGETESDY           | 12     | 1-39  | 2  | QQSYSTQYT    | 9      | -    | +          | -        |  |
| mHD535 91  | 3-53  | /    | /  | 6  | EGSLGTGNYYYYGMDV       | 17     | 2-28  | 2  | MQALQTLTY    | 9      | +    | +          | -        |  |
|            | VH    | D    | RF | JH | CDR3 (aa)              | Length | Vλ    | Jλ | CDR3 (aa)    | Length | Poly | HEp-2      | Staining |  |
| mHD535 06  | 3-7   | 1-1  | 3  | 4  | SRIRAPTGTYYFDY         | 15     | 1-51  | 2  | GTWDSLSAVV   | 11     | -    | -          | -        |  |
| mHD535 22  | 1-69  | /    | /  | 3  | EGNQGGAFDI             | 10     | 1-44  | 2  | AAWDDSLNGPV  | 11     | -    | -          | -        |  |
| mHD535 25  | 3-74  | /    | /  | 3  | EAVVLYGPGDAFDI         | 14     | 1-40  | 3  | QSYDSSLGWW   | 11     | +    | -          | -        |  |
| mHD535 37  | 3-48  | 5-5  | 2  | 4  | DSAPYSYVAIPYFDY        | 15     | 2-8   | 2  | SSYAGSNNFVV  | 11     | -    | +          | -        |  |
| mHD535 43λ |       |      |    |    | See kappa              |        | 1-51  | 2  | GTWDSLSAVV   | 11     | -    | -          | -        |  |
| mHD535 59  | 3-21  | 1-26 | 3  | 3  | KAGATKSDAFDI           | 12     | 3-21  | 2  | QVWDSSSHVV   | 11     | -    | -          | -        |  |
| mHD535 65  | 5-51  | 5-5  | 1  | 6  | HIIQPHSYGMDV           | 12     | 1-51  | 2  | GTWDSLSAGDVV | 13     | -    | -          | -        |  |
| mHD535 72  | 1-8   | 3-3  | 2  | 6  | STAGDFWSGYPEPYYYYYGMDV | 23     | 2-14  | 2  | SSYTSSTLV    | 10     | -    | -          | -        |  |
| mHD535 78  | 3-74  | 6-19 | 2  | 6  | VTGYSSGWYRPNYYGMDV     | 19     | 2-8   | 1  | SSYAGSNNPYV  | 11     | +    | -          | -        |  |
| mHD535 82  | 1-24  | /    | /  | 6  | TAGLGFSSYYGMDV         | 15     | 2-8   | 3  | SSYAGSNNLV   | 10     | -    | -          | -        |  |
| mHD535 92  | 1-18  | 3-10 | 2  | 6  | VAGGYGSDFDLNYYGMDV     | 20     | 3-25  | 3  | QSADSSGTYA   | 10     | -    | -          | -        |  |
| mHD535 95  | 5-51  | 6-13 | 2  | 4  | KYSSSWYTHYFDY          | 14     | 2-14  | 1  | SSYTSSTPYV   | 11     | -    | -          | -        |  |
|            | VH    | D    | RF | JH | CDR3 (aa)              | Length |       |    |              |        |      |            |          |  |
| mHD535 05  | 4-34  | 3-10 | 2  | 4  | RYYGSGSYSY             | 10     |       |    |              |        |      |            |          |  |
| mHD535 33  | 3-23  | 6-13 | 2  | 4  | HLWDGYSSSWYFDY         | 14     |       |    |              |        |      |            |          |  |

RF, reading frame; #, antibody failed to be expressed

-, non-reactive; +, reactive; +2, highly reactive

c, diffuse cytoplasmic staining; A, actin staining; G, Golgi staining; M, mitochondria staining; MS, mitotic spindle staining; N, nuclear staining; F, cytoplasmic fibers

**Supplemental Table 18** Repertoire and reactivity of antibodies from mature naive B cells of healthy donor 837

| Ig         | HEAVY  |      |    |    |                       | Length | LIGHT |    |              |        | Length | REACTIVITY |          |  |
|------------|--------|------|----|----|-----------------------|--------|-------|----|--------------|--------|--------|------------|----------|--|
|            | VH     | D    | RF | JH | CDR3 (aa)             |        | Vκ    | Jκ | CDR3 (aa)    | Poly   |        | HEp-2      | Staining |  |
| mHD837 49  | 1-69   | 5-24 | 3  | 4  | TVEMATIGQFGCDY        | 14     | 2-30  | 2  | MQGTHWPYT    | 9      | +      | +          | -        |  |
| mHD837 50# | 1-46   | /    | /  | 4  | DRQRGFRTLTVFDY        | 14     | 1-39  | 1  | QQSYSTPRT    | 9      |        |            |          |  |
| mHD837 51# | 1-69   | 6-19 | 3  | 3  | PAEVAVVGAFDI          | 12     | 3-20  | 1  | QQYGSSPPWT   | 10     |        |            |          |  |
| mHD837 53  | 3-53   | /    | /  | 6  | DRWIAAGGMDV           | 11     | 2-28  | 1  | MQALQTPRT    | 9      | +      | -          | -        |  |
| mHD837 55# | 1-46   | 1-26 | 3  | 4  | DRVGASYDY             | 9      | 1-33  | 4  | QQYDNLPLT    | 9      |        |            |          |  |
| mHD837 57  | 3-49   | 1-26 | 2  | 4  | INPSVGGYYVLGFDY       | 15     | 1-39  | 2  | QQSYSTPRYT   | 10     | -      | +          | -        |  |
| mHD837 60  | 4-31   | 4-17 | 2  | 5  | DGTYGDLTPS            | 10     | 1-33  | 2  | QQYDNLPLYT   | 9      | -      | -          | -        |  |
| mHD837 64# | 4-61   | 6-13 | 2  | 6  | GRGYSSSWYRYGMDV       | 16     | 3-11  | 4  | QQRSNWPLT    | 9      |        |            |          |  |
| mHD837 65  | 3-23   | 1-7  | 2  | 4  | VNNWNYFDY             | 9      | 3-20  | 4  | QQYGSSPLT    | 9      | -      | +          | -        |  |
| mHD837 66# | 3-21   | /    | /  | 6  | MLAAAMRNYYYYGMDV      | 16     | 1-39  | 1  | QQSYSTPWT    | 9      |        |            |          |  |
| mHD837 67  | 4-B    | 3-3  | 2  | 5  | EEPQYDFWSGYKRWFDP     | 19     | 3-20  | 2  | QQYGSSPGYT   | 10     | +      | +          | -        |  |
| mHD837 68  | 4-30-4 | 4-17 | 2  | 4  | FDYGDYSGTFFDY         | 13     | 3-20  | 1  | QQYGSSPRT    | 9      | -      | -          | -        |  |
| mHD837 72  | 4-4    | 3-10 | 2  | 4  | VDGSGSRARLDY          | 12     | 1-39  | 4  | QQSYSTPLT    | 9      | -      | -          | F        |  |
| mHD837 78  | 3-33   | /    | /  | 4  | DLRGSSELLGI           | 10     | 1-6   | 4  | LQDYNYPPLT   | 9      | -      | -          | -        |  |
| mHD837 80  | 4-31   | /    | /  | 6  | GTTAGHYGMDV           | 11     | 1-39  | 1  | QQSYSTPLT    | 9      | -      | +          | -        |  |
| mHD837 81  | 3-48   | 2-8  | 1  | 6  | DQYRWPFPSPFYGGMDV     | 17     | 3-15  | 2  | QQYNNWPPYT   | 10     | +      | +          | F        |  |
| mHD837 82  | 3-23   | 3-22 | 3  | 4  | AKVVVINY              | 8      | 1-5   | 2  | QQYNSYQYT    | 9      | +      | +          | F        |  |
| mHD837 83# | 5-51   | 2-8  | 3  | 4  | QQEGRVPIPISEY         | 13     | 4-1   | 1  | QQYYSTPGT    | 9      |        |            |          |  |
| mHD837 85  | 3-64   | 2-2  | 3  | 4  | VVPAAHDY              | 8      | 1-33  | 2  | QQYDNLPPYT   | 10     | -      | -          | -        |  |
| mHD837 89  | 4-4    | 3-16 | 3  | 2  | DGGGRKSRREGYFDL       | 14     | 3-11  | 1  | QQRSNWPPSWT  | 11     | +      | +          | -        |  |
| mHD837 94  | 3-30   | 3-22 | 2  | 6  | DRWYYDSSGYYYYYYGGMDV  | 22     | 1-33  | 3  | QQYDNLPPFT   | 10     | -      | +          | -        |  |
| mHD837 95# | 5-A    | 2-2  | 3  | 6  | FPVPAPYGMVDV          | 11     | 2-28  | 4  | MQALQTPLT    | 9      |        |            |          |  |
| mHD837 96  | 4-31   | 3-22 | 2  | 4  | TGRYYYYDSSGYYYDY      | 15     | 1-39  | 4  | QQSYSTSLT    | 9      | -      | +          | -        |  |
| mHD837 59  |        |      |    |    |                       |        | 3-11  | 2  | QQRSNWPGT    | 9      |        |            |          |  |
| mHD837 61  |        |      |    |    |                       |        | 1-8   | 1  | QQYYSPWT     | 9      |        |            |          |  |
|            | VH     | D    | RF | JH | CDR3 (aa)             | Length | Vλ    | Jλ | CDR3 (aa)    | Length | Poly   | HEp-2      | Staining |  |
| mHD837 63  | 4-59   | 6-19 | 3  | 3  | AFGGNIAVAGTLDAFDI     | 17     | 2-11  | 2  | CSYAGSYTYVV  | 11     | -      | -          | -        |  |
| mHD837 69  | 5-51   | 6-19 | 2  | 4  | QRRSSGWLHFDY          | 12     | 1-40  | 2  | QSYDSSLSGWSV | 12     | -      | -          | -        |  |
| mHD837 70  | 3-15   | 2-15 | 3  | 4  | QPVLVAATPRNYFDY       | 16     | 3-21  | 1  | QVWDSSSDHLYV | 12     | -      | -          | -        |  |
| mHD837 73  | 3-74   | 3-10 | 2  | 6  | PIYGSGSYKNSVYYYYGMDV  | 21     | 1-51  | 3  | GTWDSLSAWV   | 11     | -      | -          | -        |  |
| mHD837 79# | 1-18   | 6-19 | 2  | 6  | TSSSGWYDVYYYYYGGMDV   | 19     | 4-69  | 3  | QTWGTGIL     | 8      |        |            |          |  |
| mHD837 88# | 1-69   | 3-22 | 2  | 4  | YYDSSGYYYRDY          | 13     | 2-23  | 3  | CSYAGSSTWV   | 10     |        |            |          |  |
|            | VH     | D    | RF | JH | CDR3 (aa)             | Length |       |    |              |        |        |            |          |  |
| mHD837 58  | 3-48   | 2-15 | 2  | 6  | DVYCSGGSCYFKNYYYYGMDV | 21     |       |    |              |        |        |            |          |  |
| mHD837 76  | 3-30   | 4-17 | 2  | 5  | GVDYGDYDGENWFDP       | 15     |       |    |              |        |        |            |          |  |
| mHD837 84  | 3-30   | 1-26 | 3  | 3  | ELIVGDTEGGDAFDI       | 15     |       |    |              |        |        |            |          |  |
| mHD837 86  | 1-69   | 3-3  | 2  | 6  | VRHFWSGYTTNNYYYYGMDV  | 20     |       |    |              |        |        |            |          |  |
| mHD837 87  | 1-2    | /    | /  | 3  | ENGGITWYDAFDI         | 13     |       |    |              |        |        |            |          |  |
| mHD837 92  | 4-31   | 6-19 | 2  | 5  | CQVGSSGLYWFDP         | 13     |       |    |              |        |        |            |          |  |

RF, reading frame; #, antibody failed to be expressed

-, non-reactive; +, reactive; +2, highly reactive

c, diffuse cytoplasmic staining; A, actin staining; G, Golgi staining; M, mitochondria staining; MS, mitotic spindle staining; N, nuclear staining; F, cytoplasmic fibers



**Supplemental Table 19** Repertoire and reactivity of antibodies from new emigrant B cells of type 1 diabetes patient 1

| Ig         | HEAVY |             |        |    |                     |        | LIGHT |    |              |        |      | REACTIVITY |          |  |
|------------|-------|-------------|--------|----|---------------------|--------|-------|----|--------------|--------|------|------------|----------|--|
|            | VH    | D           | RF     | JH | CDR3 (aa)           | Length | Vκ    | Jκ | CDR3 (aa)    | Length | Poly | HEp-2      | Staining |  |
| neT1D01 09 | 3-21  | 3-3         | 1      | 5  | AHVLRFLEWLGDWFDP    | 16     | 3-11  | 3  | QQRSNWRIT    | 9      | +    | +          | -        |  |
| neT1D01 11 | 1-18  | 6-19        | 2      | 5  | QGGSGWYGDWFDP       | 13     | 1-8   | 1  | QQYYSYPST    | 10     | -    | -          | -        |  |
| neT1D01 16 | 1-24  | 3-10        | 3      | 4  | GYIITMVRGADQIDY     | 15     | 1-17  | 4  | LQHNSYPLT    | 9      | -    | +          | -        |  |
| neT1D01 18 | 3-9   | 1-1<br>3-10 | 2<br>3 | 4  | AYSNWNPRWVRGVLYDY   | 17     | 1-5   | 1  | QQYNSYPWT    | 9      | +2   | +          | c        |  |
| neT1D01 19 | 3-53  | 2-21        | 2      | 4  | DGWAYCGGDCWEGVDY    | 16     | 1-17  | 1  | LQHNSYPPWT   | 10     | -    | -          | -        |  |
| neT1D01 20 | 4-4   | /           | /      | 4  | TTSYFDY             | 7      | 3-20  | 2  | QQYGSSYT     | 8      | -    | -          | -        |  |
| neT1D01 23 | 3-21  | 2-2         | 2      | 6  | DGCSSTSCYTDYYYGMDV  | 19     | 2-30  | 2  | MQGTHWPPYT   | 10     | -    | -          | -        |  |
| neT1D01 28 | 4-39  | /           | /      | 4  | QPGYIPDY            | 8      | 2D-29 | 4  | MQSIQLPALT   | 10     | -    | -          | -        |  |
| neT1D01 33 | 3-21  | 3-10        | 2      | 6  | YDRSGSYSYYYYGMDV    | 18     | 2-28  | 2  | MQALQTPHT    | 9      | -    | -          | -        |  |
| neT1D01 43 | 4-39  | 3-10        | 2      | 1  | HYYGSGSYFFPSAEYFQH  | 18     | 1-33  | 3  | QQYDLNPRT    | 9      | +    | +2         | N        |  |
| neT1D01 53 | 3-21  | 3-3         | 1      | 4  | EGIRFLEWLSYSNEFDY   | 17     | 3-20  | 4  | QQYGSSPLT    | 9      | -    | +          | -        |  |
| neT1D01 55 | 3-15  | /           | /      | 3  | PRYDI               | 5      | 1-33  | 4  | QQYDNPFT     | 8      | +    | +          | -        |  |
| neT1D01 64 | 3-49  | 3-22        | 3      | 3  | DTPPMIVVDDAFDI      | 15     | 1-17  | 1  | LQHNSYPRT    | 9      | +    | +          | c        |  |
| neT1D01 69 | 1-8   | 3-10        | 1      | 6  | GRVLLWFGESEQDYGGMDV | 21     | 3-20  | 1  | QQYGSSSWT    | 9      | -    | -          | -        |  |
| neT1D01 73 | 3-30  | 3-3         | 2      | 6  | DGYDFWGSYSSYYYGMDV  | 19     | 1-17  | 3  | LQHNSYPFT    | 9      | +    | +          | c+N      |  |
| neT1D01 87 | 3-23  | 6-19        | 3      | 6  | AVAGQYYYYGMDV       | 13     | 1-5   | 1  | QQYNSYPWT    | 9      | +    | -          | -        |  |
|            | VH    | D           | RF     | JH | CDR3 (aa)           | Length | Vλ    | Jλ | CDR3 (aa)    | Length | Poly | HEp-2      | Staining |  |
| neT1D01 14 | 3-23  | 4-17        | 2      | 4  | ASDYGDFIEYNDY       | 13     | 2-23  | 2  | CSYAGSSTIVV  | 11     | -    | -          | -        |  |
| neT1D01 67 | 3-33  | 2-2         | 2      | 6  | TLPEPYCSSTSCSYGGMDV | 21     | 2-14  | 2  | SSYTSSSTLV   | 10     | -    | -          | -        |  |
| neT1D01 68 | 3-53  | 4-17        | 2      | 2  | GPGDPHYWYFDL        | 12     | 1-51  | 1  | GTWDSSLSAYV  | 11     | -    | +          | -        |  |
| neT1D01 96 | 3-33  | 6-13        | 1      | 4  | DQVLLQLAPHFIDY      | 15     | 3-21  | 2  | QVWDSSSDHLVV | 12     | -    | -          | -        |  |

RF, reading frame; #, antibody failed to be expressed

-, non-reactive; +, reactive; +2, highly reactive

c, diffuse cytoplasmic staining; A, actin staining; G, Golgi staining; M, mitochondria staining; MS, mitotic spindle staining; N, nuclear staining; F, cytoplasmic fibers

**Supplemental Table 20** Repertoire and reactivity of antibodies from new emigrant B cells of type 1 diabetes patient 2

| Ig          | HEAVY |      |    |    |                           |        | LIGHT |    |             |        | REACTIVITY |       |          |
|-------------|-------|------|----|----|---------------------------|--------|-------|----|-------------|--------|------------|-------|----------|
|             | VH    | D    | RF | JH | CDR3 (aa)                 | Length | Vκ    | Jκ | CDR3 (aa)   | Length | Poly       | HEp-2 | Staining |
| neT1D02 16  | 3-23  | 1-26 | 2  | 6  | DSYSGSYKDYYYYYGMDV        | 18     | 3-20  | 4  | QQYGSSLT    | 8      | -          | +     | c        |
| neT1D02 20# | 1-69  | 5-12 | 2  | 6  | DPTLPRYSGYDWWYYGMDV       | 19     | 1-39  | 4  | QQSYSTPLT   | 8      |            |       |          |
| neT1D02 21  | 1-18  | 4-4  | 3  | 6  | DSVTTSRIYYYYYGGMDV        | 18     | 2-28  | 1  | MQALQTPWT   | 9      | -          | +     | -        |
| neT1D02 39  | 3-48  | 2-2  | 2  | 3  | DPGYCSSTSCYTAAFDI         | 17     | 1-17  | 3  | LQHNSYPLFT  | 10     | -          | -     | -        |
| neT1D02 40# | 3-23  | 2-15 | 2  | 4  | GPGGPFYY                  | 8      | 1-8   | 1  | QQYYSYAWT   | 9      |            |       |          |
| neT1D02 43  | 3-20  | 3-10 | 2  | 4  | LRRGSGSYPLGY              | 12     | 1-5   | 2  | QQYNSYSPPT  | 10     | -          | -     | -        |
| neT1D02 47  | 4-39  | 3-9  | 2  | 5  | HGDGGGGADYDILTYSDNWFDP    | 23     | 3-11  | 4  | QQRSNWPPLT  | 10     | -          | -     | -        |
| neT1D02 48  | 3-48  | 6-19 | 3  | 4  | AIRGPFIAVAGTYFDY          | 16     | 3-11  | 1  | QQRSNWPS    | 8      | +          | +     | N        |
| neT1D02 55  | 4-39  | 2-21 | 3  | 4  | HAAGVFRHVVAIPQLGFDY       | 21     | 1-33  | 4  | QQYDNRPPT   | 9      | +2         | +2    | -        |
| neT1D02 57  | 3-43  | 6-19 | 1  | 5  | ESGQWLAPKRNWFDP           | 15     | 1-39  | 4  | QQSYSTPLT   | 9      | -          | -     | c        |
| neT1D02 58  | 3-30  | 1-26 | 1  | 4  | DRPEWELLRSPLY             | 13     | 1-33  | 2  | QQYETFPYT   | 9      | +2         | +     | -        |
| neT1D02 62# | 1-69  | 3-22 | 3  | 5  | GPIVGIGDWFDP              | 12     | 1-39  | 1  | QQSYSTPRT   | 9      |            |       |          |
| neT1D02 65# | 1-46  | 6-19 | 2  | 4  | DLTPRHASSGWRGVLVSFDY      | 20     | 1-39  | 2  | QQSYSTPPYT  | 10     |            |       |          |
| neT1D02 68  | 1-2   | 6-19 | 2  | 3  | GGSSGWYAFDI               | 11     | 1-5   | 2  | QQYNSSPYT   | 9      | -          | -     | -        |
| neT1D02 71  | 1-3   | 4-4  | 3  | 4  | GPRLTTVTHPDY              | 12     | 1D-8  | 2  | QQYYSFPPT   | 9      | -          | +     | -        |
| neT1D02 72  | 4-39  | 2-21 | 2  | 6  | HAYCGGDCYHTPLYYGMDV       | 20     | 2-28  | 4  | MQALQTLT    | 8      | -          | -     | -        |
| neT1D02 74  | 3-49  | 6-13 | 3  | 4  | VIAAAGNTVAQGY             | 13     | 1-27  | 1  | QKYNSAPWT   | 9      | -          | +     | -        |
| neT1D02 76  | 4-34  | 3-22 | 2  | 4  | GSNYDSSGYYVFFDY           | 16     | 3-15  | 1  | QQYNNWPPWS  | 10     | -          | +     | -        |
| neT1D02 78  | 3-30  | 3-22 | 2  | 4  | DAPLYYYDSSGYVPDY          | 18     | 3-20  | 3  | QQYGSSPFT   | 9      | -          | -     | -        |
| neT1D02 80  | 3-43  | 4-17 | 2  | 4  | DIYPGTYGYE                | 11     | 1-39  | 2  | QQSYSTPPYT  | 10     | -          | -     | -        |
| neT1D02 83  | 4-61  | 2-2  | 2  | 6  | VSSCSSTSCSIYYMDV          | 18     | 1-33  | 4  | QQYDNLPLT   | 9      | -          | -     | -        |
| neT1D02 84  | 3-64  | 6-13 | 3  | 5  | SSRIAAGTSLDY              | 13     | 3-20  | 4  | QQYGSSLT    | 8      | +          | +     | -        |
| neT1D02 85  | 3-30  | 2-2  | 2  | 6  | DLNLPRLNFPLSSTSCQNYYYGMDV | 25     | 1-39  | 1  | QQSYSTPPT   | 9      | +          | -     | c        |
| neT1D02 90  | 3-48  | 5-12 | 3  | 5  | DIGDLRNGWFDP              | 12     | 1-12  | 1  | QQANSFPRT   | 9      | -          | -     | -        |
| neT1D02 91# | 3-15  | 4-4  | 2  | 3  | EERHYSVDAFDI              | 12     | 3-11  | 4  | QQRSNWLLT   | 9      |            |       |          |
| neT1D02 94  | 3-30  | 5-24 | 3  | 3  | EVEMATDAFDI               | 12     | 3-20  | 1  | QQYGSSPGT   | 9      | -          | -     | N        |
|             | VH    | D    | RF | JH | CDR3 (aa)                 | Length | Vλ    | Jλ | CDR3 (aa)   | Length | Poly       | HEp-2 | Staining |
| neT1D02 04  | 7-81  | 1-26 | 3  | 4  | GVGLVGTGGYPDY             | 13     | 1-51  | 2  | GTWDSLSAVV  | 11     | -          | -     | -        |
| neT1D02 17  | 3-23  | 6-19 | 3  | 4  | HNTAVAGKRGPFDY            | 14     | 2-23  | 1  | CSYAGSSTYV  | 10     | +          | -     | -        |
| neT1D02 53  | 4-59  | 5-5  | 3  | 6  | SQVDTAMAYHYYYYYMDV        | 17     | 2-11  | 1  | CSYAGSYGYV  | 10     | +2         | +2    | -        |
| neT1D02 60  | 1-18  | 3-9  | 2  | 3  | VTDYDILTGYSHSAFDI         | 17     | 1-44  | 3  | AAWDDSLNGRV | 11     | +          | -     | -        |
| neT1D02 64  | 3-48  | /    | /  | 4  | VYRAFDY                   | 8      | 2-23  | 2  | CSYAGSSTIVV | 11     | -          | +     | c+N      |
| neT1D02 79  | 4-59  | 6-13 | 3  | 4  | DPAAAGHFDY                | 10     | 2-14  | 1  | SSYTSSSPYV  | 10     | -          | -     | -        |
| neT1D02 81  | 4-39  | 2-2  | 3  | 3  | RDNIVVPAAIRGYAFDI         | 18     | 3-25  | 2  | QSADSSGTYVV | 11     | +          | +     | -        |

RF, reading frame; #, antibody failed to be expressed

-, non-reactive; +, reactive; +2, highly reactive

c, diffuse cytoplasmic staining; A, actin staining; G, Golgi staining; M, mitochondria staining; MS, mitotic spindle staining; N, nuclear staining; F, cytoplasmic fibers

**Supplemental Table 21** Repertoire and reactivity of antibodies from new emigrant B cells of type 1 diabetes patient 3

| Ig          | HEAVY |      |    |    |                            | LIGHT  |       |    |               |        | REACTIVITY |       |          |
|-------------|-------|------|----|----|----------------------------|--------|-------|----|---------------|--------|------------|-------|----------|
|             | VH    | D    | RF | JH | CDR3 (aa)                  | Length | Vκ    | Jκ | CDR3 (aa)     | Length | Poly       | HEp-2 | Staining |
| neT1D03 15  | 3-30  | 3-10 | 1  | 5  | GLLWFGELLSARGWFDP          | 17     | 1-16  | 5  | QQYNSYPLT     | 9      | -          | -     | -        |
| neT1D03 16  | 4-4   | 2-15 | 2  | 5  | DRSHCSGGSCYVGNWFDP         | 18     | 1-17  | 4  | LQHNSYPLT     | 9      | -          | +     | -        |
| neT1D03 17  | 3-49  | 3-22 | 3  | 3  | DPITMIWVKVARNRSDAFDI       | 21     | 2D-29 | 1  | MQSIQLPWT     | 9      | +          | +     | N        |
| neT1D03 18  | 4-34  | 6-6  | 3  | 6  | GQLEARLPFRYYYYYMDV         | 18     | 3-11  | 5  | QQRSNWIT      | 8      | +          | +     | -        |
| neT1D03 19  | 1-18  | 2-2  | 3  | 5  | DWAANIVVPGWFDP             | 15     | 3-20  | 4  | QQYGSSRGT     | 9      | -          | -     | -        |
| neT1D03 20  | 4-39  | 2-21 | 2  | 4  | PIHCGGDCYYFDY              | 13     | 1-39  | 1  | QQSYSTPR      | 8      | -          | +     | -        |
| neT1D03 25# | 3-15  | 3-3  | 2  | 4  | GFYDFWSGDRRDFDY            | 15     | 3-20  | 4  | QQYGSSLT      | 8      |            |       |          |
| neT1D03 34  | 1-69  | 6-13 | 3  | 4  | GLNLEGIAAGSPFDY            | 16     | 1-5   | 2  | QQYNSYST      | 8      | +          | +     | -        |
| neT1D03 42  | 1-46  | /    | /  | 6  | AVGDPYVGTYYYYMDV           | 16     | 1-16  | 4  | QQYKTYPLT     | 9      | -          | +2    | -        |
| neT1D03 43  | 3-23  | 3-22 | 2  | 2  | YYSYWYFDL                  | 9      | 1-39  | 2  | QQSYSTPGS     | 9      | -          | +     | -        |
| neT1D03 46  | 3-21  | /    | /  | 4  | EAQRNVEPPSGY               | 12     | 1-33  | 4  | QQYDNLPLT     | 9      | -          | -     | N        |
| neT1D03 52# | 3-15  | 3-22 | 2  | 3  | KYYDSSGYYYVDQGPGLPPTLLQEHL | 29     | 2-28  | 4  | MQALQTPLT     | 9      |            |       |          |
| neT1D03 55  | 3-49  | /    | /  | 4  | SSRYGLGY                   | 8      | 1-5   | 1  | QQYNTNAA      | 8      | +          | +     | -        |
| neT1D03 59# | 1-69  | 3-22 | 2  | 4  | TGGYYDSSGYYPPPLDY          | 18     | 1-5   | 2  | RQYNSYSDYT    | 10     |            |       |          |
| neT1D03 65  | 1-2   | 6-19 | 2  | 4  | TYSRHYYFDY                 | 10     | 3-20  | 1  | QQYGSSPRT     | 9      | -          | +     | -        |
| neT1D03 68# | 3-48  | 5-5  | 2  | 4  | ENGYSRFDY                  | 9      | 3-20  | 1  | QQYGNSRT      | 8      |            |       |          |
| neT1D03 72# | 4-39  | 3-22 | 2  | 4  | HIDYYDSSGYYSDY             | 14     | 3-11  | 3  | QQRSNNT       | 6      |            |       |          |
| neT1D03 90  | 3-23  | 3-22 | 2  | 4  | DPRDYDSSGHHWY              | 14     | 4-1   | 1  | QQYYSTPTWT    | 10     | -          | -     | -        |
|             | VH    | D    | RF | JH | CDR3 (aa)                  | Length | Vλ    | Jλ | CDR3 (aa)     | Length | Poly       | HEp-2 | Staining |
| neT1D03 35  | 4-61  | 3-22 | 2  | 6  | TTYDSSGYYDYMDV             | 19     | 1-44  | 3  | AAWDDSLNGV    | 10     | -          | -     | -        |
| neT1D03 48  | 4-39  | 3-10 | 2  | 4  | LTYDSSGYSYNY               | 13     | 3-21  | 3  | QVWDDSSDWW    | 10     | +          | +2    | c        |
| neT1D03 78  | 4-39  | 3-22 | 2  | 5  | PKRIRDYDSSGYYNNWFDP        | 20     | 2-14  | 1  | SSYTSSSTLDV   | 11     | -          | +     | -        |
| neT1D03 90  | 3-23  | 3-22 | 2  | 4  | DPRDYDSSGHHWY              | 14     | 1-47  | 2  | AAWDDSLSGVV   | 11     | -          | -     | -        |
| neT1D03 93  | 3-11  | 3-22 | 2  | 6  | DYYDSSGDYYGMDV             | 15     | 1-47  | 2  | AAWDDSLSGPYVV | 13     | -          | -     | -        |

RF, reading frame; #, antibody failed to be expressed

-, non-reactive; +, reactive; +2, highly reactive

c, diffuse cytoplasmic staining; A, actin staining; G, Golgi staining; M, mitochondria staining; MS, mitotic spindle staining; N, nuclear staining; F, cytoplasmic fibers

**Supplemental Table 22** Repertoire and reactivity of antibodies from new emigrant B cells of type 1 diabetes patient 4

| Ig           | HEAVY |      |    |    |                       | LIGHT  |       |    |             |        | REACTIVITY |       |          |
|--------------|-------|------|----|----|-----------------------|--------|-------|----|-------------|--------|------------|-------|----------|
|              | VH    | D    | RF | JH | CDR3 (aa)             | Length | Vκ    | Jκ | CDR3 (aa)   | Length | Poly       | HEp-2 | Staining |
| neT1D04 1    | 3-21  | 3-22 | 2  | 3  | GEGYYYDSSGYTAAFDI     | 17     | 2-30  | 1  | MQGTHWPRT   | 9      | -          | +     | -        |
| neT1D04 5#   | 1-18  | 2-15 | 2  | 5  | GLGYCSGGSCYRFDP       | 17     | 1-27  | 4  | QKYNAPLT    | 9      |            |       |          |
| neT1D04 12   | 4-39  | 4-17 | 2  | 6  | PGGYGDYDNYGMDV        | 14     | 1-9   | 3  | QQLNSYIFT   | 9      | -          | +2    | -        |
| neT1D04 13   | 3-23  | 6-13 | 3  | 5  | DPIAAAGTKGQGWFD       | 17     | 1-8   | 4  | QQYYSYPPT   | 9      | -          | -     | -        |
| neT1D04 18   | 3-30  | 5-18 | 3  | 6  | DPEIPMVLYYYGMDV       | 16     | 1-39  | 1  | QSYSTPRS    | 9      | +          | +     | -        |
| neT1D04 25#  | 3-23  | 5-5  | 1  | 6  | FGQLWFVSVRTYYGMDV     | 19     | 2-40  | 4  | MQRIEPLT    | 9      |            |       |          |
| neT1D04 29   | 3-30  | 3-3  | 3  | 6  | DRDVTIFGVALSGMDV      | 17     | 1-8   | 1  | QQYYSYPRS   | 9      | -          | -     | -        |
| neT1D04 31   | 4-59  | 4-23 | 2  | 5  | HDYGVNGDWFD           | 12     | 1D-12 | 2  | QQANSFPYT   | 9      | -          | -     | -        |
| neT1D04 38   | 3-20  | /    | /  | 4  | NGGVVTIPFDY           | 11     | 3-20  | 1  | QQYGSSPPWS  | 10     | -          | +     | -        |
| neT1D04 39   | 4-31  | 6-19 | 3  | 6  | DHIAVAGTDYYGMDV       | 16     | 3-20  | 2  | QQYGSSPPYT  | 10     | -          | +     | c+N      |
| neT1D04 47   | 3-30  | 2-15 | 2  | 4  | DTNTRYCSGGSCYVPEPFFDY | 23     | 1-39  | 2  | QSYSTPPYT   | 10     | -          | -     | -        |
| neT1D04 114  | 4-39  | 6-19 | 3  | 4  | RLSRRFIAVAGNFDY       | 15     | 1-33  | 2  | QQYDNLPPGYT | 11     | +2         | +     | -        |
| neT1D04 118  | 4-31  | 4-17 | 2  | 5  | VSPKGYGDYVRTFD        | 15     | 1-39  | 2  | QSYSTPQYT   | 10     | -          | +     | -        |
| neT1D04 119  | 3-30  | 6-19 | 3  | 2  | DWCSRIAVAGTCSYWFYDL   | 19     | 1-5   | 4  | QQYGA       | 5      | +          | +     | -        |
| neT1D04 128  | 3-23  | /    | /  | 5  | KSGRFDP               | 7      | 1-33  | 2  | QQYDNLPPYT  | 10     | -          | +     | -        |
| neT1D04 129  | 3-23  | 2-21 | 2  | 2  | GGCGDCYGYWFYDL        | 15     | 3-15  | 1  | QQYNNWLRT   | 9      | -          | -     | -        |
| neT1D04 130  | 1-18  | 3-22 | 3  | 4  | SVVINYDDY             | 10     | 1-39  | 1  | QSYSTPRT    | 9      | +          | +     | -        |
| neT1D04 137  | 3-23  | 3-22 | 3  | 4  | VIVGALDY              | 8      | 1-39  | 2  | QSYSTRMYT   | 10     | -          | +     | c        |
| neT1D04 140  | 3-74  | 2-2  | 2  | 6  | ASPRYCSSTCYPPYYGMDV   | 22     | 2-28  | 4  | MQALQTPPT   | 9      | -          | -     | -        |
|              | VH    | D    | RF | JH | CDR3 (aa)             | Length | Vλ    | Jλ | CDR3 (aa)   | Length | Poly       | HEp-2 | Staining |
| neT1D04 21   | 3-33  | 3-22 | 2  | 3  | DSVPTYYYDDGGTFDI      | 16     | 3-25  | 1  | QSADSSGTIV  | 10     | -          | +     | -        |
| neT1D04 44   | 3-48  | 3-3  | 2  | 6  | AQENYDFWSGATYYYYGMDV  | 22     | 1-40  | 2  | QSYDSSLGSGV | 11     | +          | -     | N        |
| neT1D04 45#  | 4-31  | 2-2  | 3  | 5  | GGATVPAAINWFDP        | 14     | 1-40  | 3  | QSYDSSLGSGV | 11     |            |       |          |
| neT1D04 46   | 4-39  | 6-13 | 1  | 3  | PEGGQQRGDAFDI         | 13     | 2-14  | 2  | SSYTSSSTLV  | 10     | -          | -     | -        |
| neT1D04 117  | 3-23  | 1-26 | 1  | 4  | DLREWEPQDY            | 10     | 1-44  | 2  | AAWDDSLNGVV | 11     | -          | -     | -        |
| neT1D04 135  | 3-23  | 2-8  | 3  | 4  | DLGPGIVLMVYALDY       | 15     | 2-11  | 2  | CSYAGSYSVV  | 10     | -          | +     | -        |
| neT1D04 148# | 7-81  | 3-22 | 2  | 5  | QTGRADLPYDNPWFDP      | 17     | 1-44  | 3  | AAWDDSLNGVV | 11     |            |       |          |

RF, reading frame; #, antibody failed to be expressed

-, non-reactive; +, reactive; +2, highly reactive

c, diffuse cytoplasmic staining; A, actin staining; G, Golgi staining; M, mitochondria staining; MS, mitotic spindle staining; N, nuclear staining; F, cytoplasmic fibers

**Supplemental Table 23** Repertoire and reactivity of antibodies from new emigrant B cells of type 1 diabetes patient 5

| Ig          | HEAVY |              |        |    |                        |        | LIGHT |    |              |        |      | REACTIVITY |          |  |
|-------------|-------|--------------|--------|----|------------------------|--------|-------|----|--------------|--------|------|------------|----------|--|
|             | VH    | D            | RF     | JH | CDR3 (aa)              | Length | Vκ    | Jκ | CDR3 (aa)    | Length | Poly | HEp-2      | Staining |  |
| neT1D05 1#  | 1-58  | 3-3          | 2      | 4  | ESYYDFWSGYFTWDY        | 15     | 3-20  | 2  | QQYGSSPDT    | 9      |      |            |          |  |
| neT1D05 6   | 3-23  | 2-15         | 2      | 4  | SISGGRVY               | 8      | 1-5   | 1  | QQYNSYWT     | 8      | -    | -          | N        |  |
| neT1D05 7   | 3-33  | 3-10         | 2      | 6  | DQERYYGSGSYFYGMVDV     | 18     | 1-39  | 3  | QQSYSTPFT    | 9      | -    | +          | -        |  |
| neT1D05 8   | 3-15  | 3-9          | 1      | 4  | GEPPVLRVFDWQTPFDY      | 17     | 3-20  | 1  | QQYGSSPWT    | 9      | -    | +          | -        |  |
| neT1D05 13  | 3-48  | /            | /      | 4  | DWSPGDY                | 7      | 2-30  | 1  | MQGTHWPWT    | 9      | -    | -          | -        |  |
| neT1D05 16# | 1-3   | 2-15         | 2      | 6  | GEPRYCSCGGSCYGYMDV     | 19     | 4-1   | 4  | QQYYSTPLT    | 9      |      |            |          |  |
| neT1D05 19  | 4-39  | 7-27         | 2      | 4  | RGNWDREDY              | 9      | 1-39  | 2  | QQSYSTLPRCS  | 11     | +    | +2         | -        |  |
| neT1D05 21  | 4-39  | 3-10         | 2      | 4  | LLDYGSGRD              | 10     | 1-5   | 1  | QQYNSYSPET   | 10     | -    | +          | -        |  |
| neT1D05 26  | 3-30  | /            | /      | 4  | EDGTKPGFFDY            | 11     | 3-15  | 1  | QQYNNWWT     | 8      | -    | -          | -        |  |
| neT1D05 29  | 3-21  | 3-10         | 2      | 6  | EWDYGSGSYMNYYYGMDV     | 20     | 3-11  | 5  | QQRSNWPPVT   | 10     | -    | -          | -        |  |
| neT1D05 31  | 4-34  | 3-10         | 3      | 4  | GPMVVRGAPVDY           | 12     | 1-39  | 1  | QQSYSTPWT    | 9      | -    | -          | -        |  |
| neT1D05 33# | 3-15  | 3-10         | 1      | 4  | DMELWFRELPNDY          | 13     | 4-1   | 1  | QQYYSTPRT    | 9      |      |            |          |  |
| neT1D05 49  | 3-30  | 6-19         | 3      | 4  | AVAGINPPYDY            | 11     | 1-5   | 2  | QQYNSYSRT    | 9      | -    | -          | c+N      |  |
| neT1D05 51  | 3-30  | 2-15         | 2      | 4  | DRGGAGCSCGGSCYSAGFDY   | 19     | 3-15  | 1  | QQYNNWWT     | 8      | -    | -          | -        |  |
| neT1D05 54  | 3-15  | 5-12         | 2      | 4  | DLFSVYSGYI             | 10     | 1-39  | 5  | QQSYSTLIT    | 9      | -    | +          | -        |  |
| neT1D05 58  | 1-69  | 5-12         | 3      | 6  | GGGIVATFSLYYYYMDV      | 18     | 1-39  | 1  | QQSYSTPRT    | 9      | +    | +          | -        |  |
| neT1D05 96  | 3-30  | 2-15         | 2      | 5  | ELYCSCGGSCYQAWPGHGGFDP | 21     | 3-11  | 3  | QQRSNWPRFT   | 10     | -    | -          | N        |  |
|             | VH    | D            | RF     | JH | CDR3 (aa)              | Length | Vλ    | Jλ | CDR3 (aa)    | Length | Poly | HEp-2      | Staining |  |
| neT1D05 3#  | 3-53  | 3-16<br>6-19 | 2<br>2 | 4  | DLRWGSSGLDY            | 11     | 1-51  | 3  | GTWDSNLTRV   | 10     |      |            |          |  |
| neT1D05 15  | 3-23  | 4-17         | 2      | 5  | DLKLGYGDYNNWFDP        | 15     | 1-47  | 3  | AAWDDSLSGWV  | 11     | -    | -          | -        |  |
| neT1D05 30  | 3-30  | /            | /      | 4  | DGGSFDY                | 7      | 1-51  | 1  | GTWDSLSAYV   | 11     | -    | -          | -        |  |
| neT1D05 32  | 3-49  | 3-10         | 1      | 4  | SLWSYFDY               | 9      | 2-14  | 3  | SSYTSSSTLDWV | 12     | -    | +          | -        |  |
| neT1D05 41# | 3-74  | 1-26         | 2      | 4  | GGGSHWDY               | 8      | 2-11  | 3  | CSYTSSATPNWV | 12     |      |            |          |  |
| neT1D05 43  | 4-34  | /            | /      | 4  | GPVHMARDY              | 10     | 2-23  | 3  | CSYAGSSTLV   | 12     | -    | +          | -        |  |
| neT1D05 44  | 4-34  | 6-13         | 2      | 4  | GLRMEYSSSWFYFDY        | 15     | 2-8   | 2  | SSYAGSNNAVV  | 11     | -    | +          | -        |  |
| neT1D05 65  | 3-53  | 6-19         | 3      | 6  | TIAVAYYYYYMDV          | 13     | 3-1   | 2  | QAWDSSTVV    | 9      | +    | +2         | -        |  |
| neT1D05 67  | 3-23  | 2-15         | 3      | 4  | QVGVVVAEGLGY           | 12     | 1-47  | 3  | AAWGDLSLGQV  | 11     | -    | -          | -        |  |
| neT1D05 71  | 4-31  | 3-3          | 2      | 4  | IYDFWSGHFDY            | 11     | 1-47  | 2  | AAWDDSLSGVV  | 11     | -    | +          | -        |  |
| neT1D05 72  | 3-23  | 6-13         | 2      | 4  | RAGGAYSSIDY            | 11     | 3-21  | 2  | QVWDSSTHDVV  | 11     | -    | +          | -        |  |
| neT1D05 76  | 3-21  | 3-3          | 2      | 4  | FWSGYSLFDY             | 10     | 2-11  | 3  | CSYAGSYTGV   | 10     | +2   | +2         | -        |  |

RF, reading frame; #, antibody failed to be expressed

-, non-reactive; +, reactive; +2, highly reactive

c, diffuse cytoplasmic staining; A, actin staining; G, Golgi staining; M, mitochondria staining; MS, mitotic spindle staining; N, nuclear staining; F, cytoplasmic fibers

**Supplemental Table 24** Repertoire and reactivity of antibodies from new emigrant B cells of type 1 diabetes patient 903

| Ig           | HEAVY |      |    |    |                        | LIGHT  |      |    |              |        | REACTIVITY |       |          |
|--------------|-------|------|----|----|------------------------|--------|------|----|--------------|--------|------------|-------|----------|
|              | VH    | D    | RF | JH | CDR3 (aa)              | Length | Vκ   | Jκ | CDR3 (aa)    | Length | Poly       | HEp-2 | Staining |
| neT1D903 03  | 3-7   | 2-15 | 2  | 5  | EGGLPKPGYCSGGSCYSSWFDP | 22     | 3-11 | 4  | QQRSNWPQVT   | 10     | -          | -     | -        |
| neT1D903 12# | 1-3   | 2-2  | 3  | 4  | EGDIVVPAAFDY           | 13     | 4-1  | 1  | QQYYSTPRT    | 9      |            |       |          |
| neT1D903 16  | 1-24  | 3-16 | 3  | 4  | DLRMITFGGVIAGTDF       | 16     | 3-11 | 4  | QQRSNWPLT    | 9      | +          | +     | -        |
| neT1D903 17  | 1-69  | 3-16 | 1  | 4  | EGEGTGTISY             | 10     | 3-20 | 4  | QQYGSSPRLT   | 10     | -          | +     | -        |
| neT1D903 18# | 3-7   | 5-24 | 2  | 3  | TPTAGDGYNLDI           | 12     | 1-33 | 4  | QQYDNLPLT    | 9      |            |       |          |
| neT1D903 20  | 3-23  | 3-3  | 2  | 4  | QDGDVWVSGFTFLGDY       | 15     | 3-20 | 1  | QQYGSSPT     | 8      | -          | -     | -        |
| neT1D903 29  | 5-51  | 5-12 | 2  | 4  | RPQGHDSGYDYAFDY        | 15     | 1-39 | 1  | QQSYSTPWT    | 9      | -          | +     | -        |
| neT1D903 31  | 3-48  | 6-13 | 3  | 1  | DGIAAAGIRYFQH          | 13     | 1-5  | 1  | QQYNSYSRT    | 9      | +          | +     | -        |
| neT1D903 33  | 4-61  | 3-22 | 2  | 4  | MYYYDSSGYLDY           | 12     | 3-11 | 3  | QQRSNWPFT    | 9      | -          | -     | -        |
| neT1D903 39  | 3-11  | 4-23 | 2  | 4  | RNSDGGDY               | 8      | 2-28 | 1  | MQALQTLWT    | 9      | -          | +     | -        |
| neT1D903 41# | 4-34  | /    | /  | 4  | GEKGRARFREGSYYFDY      | 17     | 1-27 | 1  | QKYNAPRT     | 9      |            |       |          |
| neT1D903 42  | 3-7   | 6-13 | 2  | 4  | DPDSSWSLGGHFDY         | 15     | 1-9  | 4  | QQP          | 3      | -          | -     | -        |
| neT1D903 06  |       |      |    |    |                        |        | 2-28 | 4  | MQALQALT     | 9      |            |       |          |
| neT1D903 25  |       |      |    |    |                        |        | 1-5  | 1  | QQYNSYSRT    | 9      |            |       |          |
|              | VH    | D    | RF | JH | CDR3 (aa)              | Length | Vλ   | Jλ | CDR3 (aa)    | Length | Poly       | HEp-2 | Staining |
| neT1D903 07  | 5-51  | 2-15 | 2  | 5  | QPLGYCSGGSCPPFDP       | 16     | 1-51 | 3  | GTWDSSLSAGV  | 11     | +          | +     | -        |
| neT1D903 08  | 3-7   | 5-24 | 2  | 3  | GGDGFYFDDAFDI          | 13     | 1-47 | 3  | AAWDDSLGSL   | 11     | -          | -     | -        |
| neT1D903 11  | 4-39  | /    | /  | 5  | RIGPNWFDP              | 9      | 3-21 | 2  | QVWSSSDHVV   | 12     | -          | -     | -        |
| neT1D903 15  | 1-3   | /    | /  | 3  | DFDI                   | 4      | 3-27 | 2  | YSAADNNPVV   | 10     | +          | +     | N        |
| neT1D903 21  | 7-4-1 | 6-13 | 3  | 5  | EGDAAAGTSDWFDP         | 14     | 1-44 | 1  | AAWDDSLNGLYV | 12     | -          | -     | -        |
| neT1D903 22  | 1-8   | /    | /  | 4  | GRPTNYFDY              | 9      | 3-1  | 2  | QAWDSSTGV    | 9      | -          | -     | -        |
| neT1D903 26# | 3-9   | /    | /  | 3  | VEAAEDAFDI             | 10     | 3-1  | 2  | QAWDSSTVV    | 9      |            |       |          |
| neT1D903 27  | 3-23  | 6-19 | 2  | 4  | GLGGGSGQYFYDY          | 13     | 3-21 | 2  | QVWSSSDHFVV  | 12     | -          | -     | -        |
| neT1D903 34  | 4-39  | 4-17 | 2  | 4  | HYLSYGDLYFYDY          | 13     | 1-40 | 1  | QSYDSSLGPCYV | 13     | -          | -     | -        |
| neT1D903 35  | 4-4   | 3-22 | 2  | 4  | DRGYDSSGYYPYFYDY       | 18     | 1-51 | 2  | GTWDSSLSAVV  | 11     | -          | -     | -        |
| neT1D903 36  | 3-30  | 3-22 | 2  | 4  | DRSVEGSGYFYDY          | 12     | 1-51 | 2  | GTWDSSLSAGL  | 11     | -          | -     | -        |
| neT1D903 37  | 3-30  | 3-3  | 3  | 4  | THHIGDSVTIFGVVEPNFYDY  | 20     | 1-47 | 7  | AAWDDSLGRAV  | 12     | -          | -     | -        |
| neT1D903 38  | 3-66  | 3-16 | 3  | 4  | ARTLGGKFDY             | 10     | 1-44 | 1  | AAWDDSLNGYV  | 11     | -          | -     | -        |
| neT1D903 44  | 3-30  | 4-17 | 3  | 4  | GGMTTVTRFDY            | 11     | 1-44 | 2  | AAWDDSLNGVV  | 11     | -          | -     | -        |
| neT1D903 47  | 1-58  | 5-5  | 2  | 3  | DRGGYSYGYDPLAFDI       | 16     | 2-14 | 2  | SSYTSSHVV    | 9      | +          | +     | -        |
| neT1D903 04  |       |      |    |    |                        |        | 2-14 | 2  | SSYTSSSTVV   | 10     |            |       |          |
| neT1D903 45  |       |      |    |    |                        |        | 3-25 | 2  | QSADSSGYVV   | 11     |            |       |          |
| neT1D903 46  |       |      |    |    |                        |        | 1-51 | 2  | GTWDSSLSAGQV | 12     |            |       |          |
| neT1D903 48  |       |      |    |    |                        |        | 2-11 | 1  | CSYAGSSYV    | 9      |            |       |          |
|              | VH    | D    | RF | JH | CDR3 (aa)              | Length |      |    |              |        |            |       |          |
| neT1D903 23  | 4-39  | /    | /  | 3  | RGGIADDAFDI            | 11     |      |    |              |        |            |       |          |
| neT1D903 24  | 1-69  | 3-22 | 2  | 2  | SLYYDSSGPGWYFDL        | 16     |      |    |              |        |            |       |          |
| neT1D903 40  | 3-48  | 3-3  | 3  | 4  | VAIFGVVILDY            | 12     |      |    |              |        |            |       |          |

RF, reading frame; #, antibody failed to be expressed

-, non-reactive; +, reactive; +2, highly reactive

c, diffuse cytoplasmic staining; A, actin staining; G, Golgi staining; M, mitochondria staining; MS, mitotic spindle staining; N, nuclear staining; F, cytoplasmic fibers

**Supplemental Table 25** Repertoire and reactivity of antibodies from new emigrant B cells of type 1 diabetes patient 929

| Ig           | HEAVY  |      |    |    |                    | LIGHT  |      |    |              |        | REACTIVITY |       |          |
|--------------|--------|------|----|----|--------------------|--------|------|----|--------------|--------|------------|-------|----------|
|              | VH     | D    | RF | JH | CDR3 (aa)          | Length | Vκ   | Jκ | CDR3 (aa)    | Length | Poly       | HEp-2 | Staining |
| neT1D929 01  | 3-11   | 1-26 | 2  | 3  | FFGGYSGSQGAFDI     | 14     | 1-8  | 4  | QQYYSYPLT    | 9      | -          | +     | -        |
| neT1D929 02  | 3-23   | 3-22 | 2  | 4  | PVYYDSSGGYGFYD     | 15     | 1-39 | 4  | QQSYSTLLT    | 9      | -          | -     | -        |
| neT1D929 03  | 3-21   | /    | /  | 4  | GGPEKIHDRPPQIDY    | 15     | 3-11 | 1  | QQRSNWPPT    | 9      | -          | -     | N        |
| neT1D929 05  | 3-33   | 6-19 | 2  | 1  | SPIEGWSPHFASAEYFQH | 18     | 3-20 | 2  | QQYGSSPYT    | 9      | -          | -     | -        |
| neT1D929 06  | 3-49   | 1-26 | 1  | 4  | DGKLLRGDY          | 9      | 1-5  | 2  | QQYNSYPCS    | 9      | +          | +     | -        |
| neT1D929 10  | 3-15   | 1-26 | 2  | 3  | DFSGNVGAFDI        | 11     | 3-20 | 1  | QQYGSSPRT    | 9      | -          | -     | -        |
| neT1D929 12  | 4-59   | 3-22 | 2  | 4  | GGSGYYDSSGKTFDY    | 15     | 3-20 | 4  | QQYGSSPLT    | 9      | -          | -     | -        |
| neT1D929 17  | 4-34   | 1-26 | 3  | 3  | DGVGAKAFDI         | 10     | 3-15 | 1  | QQYNNWPPWT   | 10     | -          | -     | -        |
| neT1D929 18# | 4-31   | 2-2  | 2  | 6  | VRYSSTSCPSYYMDV    | 16     | 3-20 | 2  | QQYGSSPPECS  | 11     |            |       |          |
| neT1D929 20  | 3-23   | /    | /  | 5  | LGREYYHNT          | 9      | 3-11 | 4  | QQRSNWPPLA   | 10     | -          | -     | c        |
| neT1D929 29  | 4-39   | 3-22 | 3  | 3  | ITMIAMENAFDI       | 12     | 1-39 | 2  | QQSYSTPYT    | 9      | +          | +     | -        |
| neT1D929 31  | 3-66   | 5-24 | 2  | 2  | SQARDGYSIVGYFDL    | 15     | 1-27 | 1  | QKYNAPWT     | 9      | -          | -     | -        |
| neT1D929 33  | 3-48   | 6-13 | 2  | 6  | DSSSWGGLYYGMDV     | 15     | 3-20 | 4  | QQYGSSPPGLT  | 11     | -          | +     | -        |
| neT1D929 40  | 3-7    | 3-22 | 2  | 5  | DHYDSSGGYGGWFDP    | 15     | 3-20 | 1  | QQYGSSPRT    | 9      | -          | -     | -        |
| neT1D929 14  |        |      |    |    |                    |        | 1-39 | 3  | QQSYSTFT     | 8      |            |       |          |
| neT1D929 37  |        |      |    |    |                    |        | 1-6  | 2  | LQDYNYPYT    | 9      |            |       |          |
| neT1D929 39  |        |      |    |    |                    |        | 1-5  | 1  | QQYNSYPWT    | 9      |            |       |          |
| neT1D929 41  |        |      |    |    |                    |        | 3-15 | 1  | QQYNNWPQT    | 9      |            |       |          |
| neT1D929 42  |        |      |    |    |                    |        | 3-15 | 1  | QQYNNWPRT    | 9      |            |       |          |
| neT1D929 43  |        |      |    |    |                    |        | 2-28 | 1  | MQALQTPGA    | 9      |            |       |          |
| neT1D929 47  |        |      |    |    |                    |        | 1-27 | 3  | QKYNAPPFT    | 10     |            |       |          |
|              | VH     | D    | RF | JH | CDR3 (aa)          | Length | Vλ   | Jλ | CDR3 (aa)    | Length | Poly       | HEp-2 | Staining |
| neT1D929 15  | 3-7    | 1-26 | 2  | 4  | APRWYSGSHFDY       | 12     | 3-21 | 2  | QVWDSSSDQVV  | 11     | -          | -     | -        |
| neT1D929 19  | 1-2    | 2-2  | 1  | 5  | DPHQLLFWFDP        | 11     | 2-23 | 2  | CSYAGSSTFVV  | 11     | +          | +     | N        |
| neT1D929 26  | 3-74   | 6-6  | 2  | 4  | ALFDFDSSSSWGGFDY   | 16     | 3-25 | 2  | QSADSSGTYV   | 10     | -          | -     | -        |
| neT1D929 30# | 4-39   | 5-5  | 3  | 2  | HVCVDTAMGDPIYWYFDL | 18     | 2-23 | 2  | CSYAGSSTGV   | 10     |            |       |          |
| neT1D929 43  | 1-2    | 2-2  | 1  | 5  | NPMYQNSP           | 8      | 1-44 | 3  | AAWDDSLNGWV  | 11     | +          | +     | -        |
| neT1D929 44  | 1-3    | 4-23 | 3  | 4  | EGTVVTTQYYFDY      | 13     | 1-51 | 2  | GTWDSSLSAVV  | 11     | -          | -     | -        |
| neT1D929 45# | 3-21   | /    | /  | 5  | MDKLVGPLRGWFDP     | 14     | 2-14 | 1  | SSYTSSSTLLYV | 12     |            |       |          |
| neT1D929 46  | 4-4    | /    | /  | 2  | VGASRGLPWGWYFDL    | 15     | 2-14 | 1  | SSYTSSSSSYV  | 11     | +          | -     | -        |
|              | VH     | D    | RF | JH | CDR3 (aa)          | Length |      |    |              |        |            |       |          |
| neT1D929 09  | 3-43   | 6-19 | 3  | 4  | DIAVAGIRGGDEFDY    | 15     |      |    |              |        |            |       |          |
| neT1D929 11  | 4-30-2 | 3-16 | 1  | 5  | AGNLGVNWFDP        | 11     |      |    |              |        |            |       |          |
| neT1D929 22  | 4-34   | 2-2  | 3  | 4  | DSRGIVVPAASSGFDY   | 17     |      |    |              |        |            |       |          |
| neT1D929 23  | 1-18   | 5-12 | 3  | 4  | ILVAPKGALDY        | 11     |      |    |              |        |            |       |          |
| neT1D929 24  | 4-39   | 2-8  | 1  | 5  | HLYSYNWFDP         | 10     |      |    |              |        |            |       |          |
| neT1D929 25  | 4-4    | 5-24 | 2  | 4  | ASKDGYTLNLYFDY     | 13     |      |    |              |        |            |       |          |
| neT1D929 32  | 4-59   | 3-22 | 2  | 4  | HAGYDSSGYPMYFDY    | 16     |      |    |              |        |            |       |          |

RF, reading frame; #, antibody failed to be expressed

-, non-reactive; +, reactive; +2, highly reactive

c, diffuse cytoplasmic staining; A, actin staining; G, Golgi staining; M, mitochondria staining; MS, mitotic spindle staining; N, nuclear staining; F, cytoplasmic fibers

**Supplemental Table 26** Repertoire and reactivity of antibodies from new emigrant B cells of type 1 diabetes patient 430

| Ig            | HEAVY  |             |        |    |                       | Length | LIGHT |    |                 |        | REACTIVITY |       |          |
|---------------|--------|-------------|--------|----|-----------------------|--------|-------|----|-----------------|--------|------------|-------|----------|
|               | VH     | D           | RF     | JH | CDR3 (aa)             |        | Vκ    | Jκ | CDR3 (aa)       | Length | Poly       | HEp-2 | Staining |
| neT1D430 01   | 6-1    | 6-13        | 3      | 4  | DRGGVEEPGIAAQVFDY     | 17     | 4-1   | 1  | QQYYSTPRT       | 9      | -          | -     | -        |
| neT1D430 03   | 3-21   | 1-7         | 2      | 4  | AGDNWNPELHYFDY        | 14     | 3-20  | 2  | QQYGSSPVT       | 9      | -          | -     | -        |
| neT1D430 07   | 4-59   | 4-17        | 3      | 6  | GPSVTTVYYYYGMDV       | 15     | 3-20  | 3  | QQYGSSRFT       | 9      | +2         | +     | -        |
| neT1D430 08   | 1-69   | 6-6         | 2      | 6  | GEYSSSSYYYYYMDV       | 16     | 1-12  | 4  | QQANSFPLT       | 9      | +          | +     | -        |
| neT1D430 10κ# | 1-24   | 3-22        | 2      | 4  | HQGGNYDSNYFDY         | 14     | 3-11  | 5  | QQRSNWPLT       | 9      |            |       |          |
| neT1D430 11   | 4-30-2 | /           | /      | 4  | GKTGYFFDY             | 10     | 1-39  | 1  | QQSYSTRT        | 8      | +2         | +     | -        |
| neT1D430 17   | 4-31   | 4-17        | 2      | 6  | SDYGGDDYYYYMDV        | 14     | 1-12  | 2  | QQANSFPWT       | 9      | -          | -     | -        |
| neT1D430 21   | 3-11   | 2-2         | 3      | 6  | GEGGVVPAAIKHIYYYYMDV  | 21     | 3-20  | 2  | QQYGSSLYT       | 9      | +          | +     | -        |
| neT1D430 23#  | 1-69   | 3-9<br>1-20 | 1<br>1 | 3  | ERSVDLDWTELENGAFDI    | 19     | 3D-20 | 3  | QQYGSSPPGGAQPFT | 15     |            |       |          |
| neT1D430 25   | 4-34   | 3-9         | 2      | 4  | ASTYYDILTGYKSDCLDY    | 19     | 2D-29 | 5  | MQSIQLPPA       | 9      | -          | +     | -        |
| neT1D430 27   | 1-69   | 2-15        | 3      | 6  | RAPVAPNIVVVAAPLKYGMDV | 22     | 4-1   | 4  | QQYYSTPLT       | 9      | +          | +     | -        |
| neT1D430 33   | 3-30   | 1-7         | 3      | 6  | DHITGTTLGYFFDY        | 16     | 1-8   | 1  | QQYYSYPPT       | 9      | +          | -     | -        |
| neT1D430 36   | 1-18   | 1-26        | 2      | 4  | HPGDSSGYLLPDY         | 13     | 1-5   | 2  | QQYNSMYT        | 9      | +          | +     | -        |
| neT1D430 41κ# | 3-53   | 3-10        | 2      | 6  | EGDYGGSGSYYPNNYYYYMDV | 22     | 1-39  | 1  | QQSYSTPRT       | 9      |            |       |          |
| neT1D430 42   | 3-30   | 3-3         | 1      | 6  | DTLRSLLYMDV           | 12     | 315   | 5  | QQYNNWPPIT      | 10     | -          | -     | -        |
|               | VH     | D           | RF     | JH | CDR3 (aa)             | Length | Vλ    | Jλ | CDR3 (aa)       | Length | Poly       | HEp-2 | Staining |
| neT1D430 02   | 4-61   | 3-10        | 2      | 3  | AVYYGNAFDI            | 10     | 3-21  | 2  | QVWDSSSDVV      | 10     | -          | -     | -        |
| neT1D430 10λ  |        |             |        |    | see kappa             |        | 1-47  | 2  | AAWDDSLSGHV     | 12     | -          | -     | -        |
| neT1D430 15   | 3-33   | 4-23        | 3      | 3  | VSGEVVTHGAFDI         | 13     | 3-1   | 2  | QAWDSSSTVV      | 9      | -          | -     | -        |
| neT1D430 22   | 4-59   | 3-10        | 1      | 4  | APGGLWFRESSAYFDY      | 16     | 1-44  | 3  | AAWDDSLNGPWV    | 12     | +          | +     | -        |
| neT1D430 26   | 4-59   | 6-19        | 2      | 4  | GDSSGWYFF             | 9      | 1-44  | 2  | AAWDDSLNGYVV    | 12     | -          | -     | -        |
| neT1D430 28   | 3-23   | 3-22        | 2      | 4  | ADRSYWGHDY            | 11     | 3-1   | 2  | QAWDSSIVV       | 9      | -          | -     | -        |
| neT1D430 32   | 3-30   | 3-16        | 2      | 3  | DTYDYVWGSYRTNAFDI     | 17     | 3-21  | 1  | QVWDSSSDHPFYV   | 13     | -          | -     | -        |
| neT1D430 41λ  |        |             |        |    | see kappa             |        | 1-40  | 3  | QSYDSSLSGRV     | 11     | -          | -     | -        |
| neT1D430 43   | 3-30   | 6-13        | 3      | 6  | QSPAADPSYMDV          | 12     | 1-47  | 2  | AAWDDSLSGVV     | 11     | -          | -     | -        |
| neT1D430 44#  | 1-2    | /           | /      | 6  | GETLVGYFFDY           | 12     | 2-14  | 2  | SSYSSSTVV       | 10     |            |       |          |
|               | VH     | D           | RF     | JH | CDR3 (aa)             | Length |       |    |                 |        |            |       |          |
| neT1D430 45   | 4-39   | 3-22        | 2      | 4  | HTPPWGGYFFDY          | 14     |       |    |                 |        |            |       |          |
| neT1D430 06   | 5-51   | 2-21        | 2      | 2  | HAYCGGDCYQDWYFDL      | 16     |       |    |                 |        |            |       |          |
| neT1D430 12   | 4-31   | 1-26        | 2      | 5  | AQEGASGSYSRDGNWFDP    | 18     |       |    |                 |        |            |       |          |
| neT1D430 16   | 4-39   | 4-17        | 3      | 4  | HTMTVTIDY             | 10     |       |    |                 |        |            |       |          |
| neT1D430 19   | 3-15   | 3-22        | 3      | 3  | DPTPAVIVVARGGYDAFDI   | 19     |       |    |                 |        |            |       |          |
| neT1D430 31   | 1-69   | 2-2         | 2      | 4  | GGRYCSSTSCYRAPDY      | 16     |       |    |                 |        |            |       |          |

RF, reading frame; #, antibody failed to be expressed

-, non-reactive; +, reactive; +2, highly reactive

c, diffuse cytoplasmic staining; A, actin staining; G, Golgi staining; M, mitochondria staining; MS, mitotic spindle staining; N, nuclear staining; F, cytoplasmic fibers



**Supplemental Table 27** Repertoire and reactivity of antibodies from mature naive B cells of type 1 diabetes patient 1

| Ig         | HEAVY |      |    |    |                       | LIGHT  |      |    |             |        | REACTIVITY |       |          |
|------------|-------|------|----|----|-----------------------|--------|------|----|-------------|--------|------------|-------|----------|
|            | VH    | D    | RF | JH | CDR3 (aa)             | Length | Vκ   | Jκ | CDR3 (aa)   | Length | Poly       | HEp-2 | Staining |
| mT1D01 07  | 3-13  | 4-23 | 2  | 2  | AIRYYGNSVPFSYFDL      | 17     | 3-11 | 4  | QQRSNWLT    | 8      | +          | +     | -        |
| mT1D01 21  | 3-11  | 1-7  | 3  | 5  | DSTMLRGGTGTPQIPYDWFDP | 21     | 1-39 | 2  | QQSYSTPRT   | 9      | -          | -     | -        |
| mT1D01 22  | 1-2   | 3-22 | 2  | 3  | DSSGYRDAFDI           | 12     | 1-33 | 4  | QQYDNLPPPT  | 9      | -          | +     | -        |
| mT1D01 28  | 3-23  | 3-10 | 2  | 6  | DLDGSGSAMDV           | 11     | 1-8  | 2  | QQYYSYPYT   | 9      | -          | -     | -        |
| mT1D01 30# | 4-4   | 2-2  | 3  | 6  | AIVVVAAMKVDYGGMDV     | 19     | 1-39 | 1  | QQSYSTPRT   | 9      |            |       |          |
| mT1D01 39  | 3-9   | 6-13 | 2  | 4  | ELSSWYGPLDY           | 11     | 3-20 | 2  | QQYGSSLYT   | 9      | -          | -     | c        |
| mT1D01 40  | 3-9   | 2-15 | 2  | 4  | DMEGYCSGGSCYSGSFDY    | 18     | 3-20 | 4  | QQYGSSVLT   | 9      | -          | -     | -        |
| mT1D01 41  | 1-18  | 6-19 | 2  | 4  | XGSYLYSSGWPDY         | 14     | 3-15 | 3  | QQYNNWPRT   | 9      | -          | -     | -        |
| mT1D01 44  | 3-23  | 6-19 | 3  | 4  | GIAVAGRGARSRKNYFDY    | 18     | 1-5  | 2  | QQYNSYPYT   | 9      | +2         | +2    | N        |
| mT1D01 51  | 3-20  | 3-16 | 1  | 6  | DLHPSLYGMDV           | 12     | 1-8  | 2  | QQYYSYPRT   | 9      | -          | -     | -        |
| mT1D01 53  | 4-4   | 3-9  | 2  | 3  | NEMDYDILTYGYNRAFDI    | 18     | 3-20 | 2  | QQYGSSRVMY  | 11     | +          | +     | -        |
| mT1D01 57  | 3-11  | 2-21 | 3  | 4  | DLEGAIPRSYGY          | 12     | 1-39 | 1  | QQSYSTPPT   | 9      | -          | -     | -        |
| mT1D01 59  | 1-2   | 5-12 | 3  | 4  | SYDEPDIATIDY          | 13     | 1-5  | 1  | QQYNSYLWT   | 9      | -          | +     | -        |
| mT1D01 61  | 1-69  | 2-15 | 2  | 6  | PTYCSGGSCYVRTTYGGMDV  | 22     | 2-28 | 3  | MQALQTPFLT  | 10     | +2         | +     | -        |
| mT1D01 64  | 4-4   | 1-26 | 2  | 6  | DEIGGSYSGFYGGMDV      | 17     | 2-28 | 1  | MQALQTPRT   | 9      | -          | -     | -        |
| mT1D01 67  | 3-53  | 5-24 | 2  | 4  | DGYFFDY               | 7      | 3-15 | 2  | QQYNIGRYT   | 9      | -          | +     | -        |
| mT1D01 70  | 1-8   | /    | /  | 3  | ILRKKPGAFDI           | 11     | 3-11 | 4  | QQRSNWPPLT  | 10     | +          | +     | N        |
| mT1D01 73  | 1-8   | 3-22 | 2  | 4  | GDLSSASDFDY           | 11     | 1-39 | 1  | QQSYSTPWT   | 9      | -          | -     | -        |
| mT1D01 76  | 3-23  | 5-5  | 2  | 4  | DKGRGYSYEFFDY         | 14     | 3-20 | 1  | QQYGSSRT    | 8      | -          | -     | -        |
| mT1D01 77  | 4-31  | 1-26 | 2  | 4  | TDSGSPYFFDY           | 11     | 3-15 | 2  | QQYNNWPYT   | 9      | -          | +     | -        |
| mT1D01 79# | 3-30  | 7-27 | 2  | 4  | DLSNWSGSPAGFPFDY      | 16     | 1-33 | 2  | QQYDNLPPA   | 9      |            |       |          |
| mT1D01 89  | 4-4   | 1-26 | 1  | 4  | FVGDWELLRGGGFDY       | 15     | 3-20 | 1  | QQYGSSPWT   | 9      | -          | -     | -        |
| mT1D01 91  | 3-23  | 3-3  | 2  | 4  | DHDFWGSFPLDY          | 14     | 1-6  | 1  | LQDYNYPRT   | 9      | -          | -     | -        |
| mT1D01 93# | 3-23  | 3-22 | 2  | 4  | DKREDYDSSGSFDY        | 15     | 3-20 | 1  | QQYGSSLTWT  | 10     |            |       |          |
|            | VH    | D    | RF | JH | CDR3 (aa)             | Length | Vλ   | Jλ | CDR3 (aa)   | Length | Poly       | HEp-2 | Staining |
| mT1D01 08  | 3-30  | 3-16 | 2  | 3  | DYDTDAFDI             | 9      | 2-8  | 2  | SSYAGSNAVV  | 11     | -          | -     | -        |
| mT1D01 14  | 3-30  | 4-17 | 2  | 4  | VLSYGAPWEY            | 10     | 2-14 | 1  | SSYTSSTLDV  | 11     | -          | +     | c+N      |
| mT1D01 32  | 3-9   | 6-19 | 2  | 4  | ASSGGGWSKTNNFDY       | 16     | 2-23 | 3  | CSYAGSSAWV  | 10     | -          | +     | -        |
| mT1D01 36  | 4-59  | 5-5  | 2  | 3  | YGYSYGFNRDAFDI        | 14     | 1-47 | 3  | AAWDDSLSGVV | 11     | -          | +     | -        |
| mT1D01 55  | 3-30  | 2-2  | 3  | 4  | DYGDIVVPAIDY          | 14     | 3-27 | 2  | YSAADNNVV   | 9      | -          | +     | -        |
| mT1D01 72  | 3-23  | 6-13 | 1  | 4  | DRTQQLISQFDY          | 12     | 2-23 | 7  | CSYAGSSTLAV | 11     | -          | -     | -        |

RF, reading frame; #, antibody failed to be expressed

-, non-reactive; +, reactive; +2, highly reactive

c, diffuse cytoplasmic staining; A, actin staining; G, Golgi staining; M, mitochondria staining; MS, mitotic spindle staining; N, nuclear staining; F, cytoplasmic fibers

**Supplemental Table 28** Repertoire and reactivity of antibodies from mature naive B cells of type 1 diabetes patient 2

| Ig         | HEAVY |      |    |    |                      | LIGHT  |       |    |             |        | REACTIVITY |       |          |  |
|------------|-------|------|----|----|----------------------|--------|-------|----|-------------|--------|------------|-------|----------|--|
|            | VH    | D    | RF | JH | CDR3 (aa)            | Length | Vκ    | Jκ | CDR3 (aa)   | Length | Poly       | HEp-2 | Staining |  |
| mT1D02 11  | 4-39  | 6-13 | 3  | 4  | IVAAAGLRFDY          | 11     | 1-33  | 2  | QQYDNLPLYT  | 9      | -          | -     | -        |  |
| mT1D02 12  | 3-23  | 3-3  | 2  | 3  | EKYYDFWGSYSYDAFDI    | 17     | 4-1   | 4  | QQYYSTPLT   | 9      | +          | -     | c        |  |
| mT1D02 18  | 3-23  | 3-22 | 3  | 4  | IHGITMIVVVTYFDY      | 15     | 1-5   | 1  | QQYNSYSGT   | 9      | +          | +     | c        |  |
| mT1D02 19  | 1-69  | /    | /  | 3  | EVNGAFDI             | 8      | 1-33  | 2  | QQYDNLPPYT  | 10     | -          | -     | -        |  |
| mT1D02 20  | 3-21  | 3-22 | 2  | 6  | VPNYDSSGYYYYYGMVDV   | 18     | 4-1   | 1  | QQYYSTPWT   | 9      | -          | +     | c        |  |
| mT1D02 21  | 3-15  | 3-3  | 2  | 4  | TYYDFWSGYYFFDY       | 14     | 3D-20 | 4  | QQYGSSPLT   | 9      | -          | +     | c+N      |  |
| mT1D02 23  | 3-21  | 1-26 | 1  | 3  | RWELLKNNAFDI         | 12     | 3-20  | 3  | QQYGSSPPFT  | 10     | +          | +     | c+N      |  |
| mT1D02 27# | 1-46  | 4-17 | 2  | 4  | DEPHYGDPFDY          | 11     | 1-5   | 1  | QQYNSYPRT   | 9      |            |       |          |  |
| mT1D02 44  | 3-30  | 2-15 | 2  | 4  | DMRYCSGGSCYSQFLDY    | 17     | 1-5   | 5  | QQYNSYSPIT  | 10     | -          | -     | -        |  |
| mT1D02 57  | 3-66  | /    | /  | 6  | EGDYYYMV             | 9      | 3-20  | 4  | QQYGSSSLT   | 9      |            | +     | -        |  |
| mT1D02 71# | 1-69  | 2-15 | 2  | 5  | DSHCSGGSCYSWDY       | 14     | 1-5   | 5  | QQYNSYPIT   | 9      |            |       |          |  |
| mT1D02 74  | 3-21  | 2-2  | 2  | 1  | DGSYCSSTSCYTLTEYFQH  | 19     | 1-5   | 2  | QQYNSYPT    | 8      | -          | -     | -        |  |
| mT1D02 76  | 1-69  | 3-22 | 2  | 5  | PTHYYDNNWFDP         | 12     | 3-11  | 2  | QQRSNWPPT   | 9      | +          | +     | -        |  |
| mT1D02 82  | 1-2   | 6-13 | 2  | 6  | GLGSSSCLGCYYMDV      | 15     | 1-5   | 1  | QQYNSPSA    | 8      | -          | -     | -        |  |
| mT1D02 84  | 4-39  | 2-2  | 3  | 6  | QWDIVVPAAINYYYYMDV   | 19     | 3-11  | 3  | QQRST       | 5      | -          | +     | -        |  |
| mT1D02 88  | 3-74  | 3-10 | 1  | 6  | GDGGFGEYYYYGMDV      | 15     | 1-13  | 4  | QQYNSYPHT   | 9      | -          | +     | -        |  |
| mT1D02 93  | 4-61  | 3-22 | 2  | 4  | TRYYDSSGYYFFDY       | 14     | 1-33  | 4  | QQYDNLPLT   | 9      | -          | -     | -        |  |
| mT1D02 95  | 3-9   | 3-3  | 3  | 6  | DSVFGVAQPYYYMDV      | 16     | 1-5   | 1  | QQYNSYRVT   | 9      | -          | -     | -        |  |
|            | VH    | D    | RF | JH | CDR3 (aa)            | Length | Vλ    | Jλ | CDR3 (aa)   | Length | Poly       | HEp-2 | Staining |  |
| mT1D02 02  | 1-69  | 3-10 | 1  | 5  | EEVLRFGELLRWFDP      | 15     | 2-14  | 1  | SSYTSSSTYV  | 10     | +          | +     | -        |  |
| mT1D02 03  | 1-58  | 6-19 | 3  | 5  | DVWYAVAGTGWFDP       | 14     | 1-44  | 3  | AAWDDSLNGWV | 11     | -          | +     | -        |  |
| mT1D02 05  | 3-11  | 3-10 | 3  | 4  | DLATMVRGDYVDY        | 13     | 1-44  | 3  | AAWDDSLNGRV | 11     | -          | +     | c+N      |  |
| mT1D02 07  | 1-69  | 3-10 | 1  | 5  | QLLWFGELFGWFDP       | 14     | 2-8   | 2  | SSYAGSNNAVV | 11     | +2         | +2    | -        |  |
| mT1D02 24  | 4-39  | 3-22 | 3  | 3  | RGKIVVESRGDDAFDI     | 16     | 3-1   | 2  | QAWDSSLVV   | 9      | -          | -     | -        |  |
| mT1D02 43  | 3-23  | 3-3  | 2  | 4  | DRDFWSGYPQYFFDY      | 15     | 2-14  | 2  | SSYTSSSNVV  | 10     | -          | -     | -        |  |
| mT1D02 52  | 4-31  | 6-13 | 2  | 4  | EPGGEGYSSSWYVDY      | 16     | 2-14  | 3  | SSYTSSSTPWV | 11     | -          | +     | -        |  |
| mT1D02 63  | 1-46  | 3-9  | 2  | 6  | DRDHYDILTYSDYYYYGMDV | 21     | 2-11  | 1  | CSYAGSYTFV  | 10     | +          | +2    | -        |  |
| mT1D02 66  | 1-24  | 3-22 | 2  | 4  | TNYDSSGYRGFVDY       | 15     | 3-25  | 1  | QSADSSGTYY  | 10     | -          | -     | -        |  |
| mT1D02 77  | 3-11  | 3-11 | /  | 3  | EGGGRSTDAFDI         | 13     | 2-14  | 1  | SSYTSSSRV   | 9      | -          | -     | -        |  |

RF, reading frame; #, antibody failed to be expressed

-, non-reactive; +, reactive; +2, highly reactive

c, diffuse cytoplasmic staining; A, actin staining; G, Golgi staining; M, mitochondria staining; MS, mitotic spindle staining; N, nuclear staining; F, cytoplasmic fibers

**Supplemental Table 29** Repertoire and reactivity of antibodies from mature naive B cells of type 1 diabetes patient 3

| Ig         | HEAVY |      |    |    |                         | LIGHT  |       |    |             |        | REACTIVITY |       |          |
|------------|-------|------|----|----|-------------------------|--------|-------|----|-------------|--------|------------|-------|----------|
|            | VH    | D    | RF | JH | CDR3 (aa)               | Length | Vκ    | Jκ | CDR3 (aa)   | Length | Poly       | HEp-2 | Staining |
| mT1D03 4   | 4-4   | 6-19 | 2  | 5  | DHSSGLENWFDP            | 12     | 1D-13 | 4  | QQHNNYPLT   | 9      | -          | +     | -        |
| mT1D03 8   | 3-21  | 3-3  | 3  | 4  | DWEGTIFGVVIHYFDY        | 17     | 1-39  | 3  | QQSFSTPFT   | 9      | -          | +     | -        |
| mT1D03 13  | 3-15  | 6-6  | 3  | 4  | VNLYVAARPRYFDY          | 14     | 1-27  | 3  | QKHNGAPFT   | 9      | +          | +     | -        |
| mT1D03 18  | 4-39  | 2-15 | 3  | 5  | VYVVVAATSLYNWFDP        | 16     | 3-20  | 3  | QQYGSSPPFT  | 10     | +          | +     | -        |
| mT1D03 25  | 3-74  | /    | /  | 3  | LDAFDI                  | 6      | 3-11  | 2  | QQRSNWPYT   | 9      | -          | -     | -        |
| mT1D03 32  | 3-49  | 6-19 | 3  | 4  | RVFSVAGKGLDY            | 13     | 1-33  | 2  | QQYDNLPRS   | 9      | +          | +     | -        |
| mT1D03 35  | 3-64  | 4-17 | 3  | 4  | DTGAVTTWGYFDY           | 14     | 1-39  | 2  | QQSYGVPHT   | 9      | -          | +     | -        |
| mT1D03 37  | 4-59  | 3-10 | 2  | 5  | RHFSGWFDP               | 9      | 2-28  | 5  | MQALQTAIT   | 9      | -          | -     | -        |
| mT1D03 39  | 1-69  | 1-26 | 2  | 4  | GESRFYSGSYFSLGTTAPVR    | 20     | 1-39  | 1  | QQSYTGWT    | 8      | +          | +2    | -        |
| mT1D03 42  | 3-7   | 1-20 | 2  | 4  | ESFFWNEGTYEFGTNDQ       | 17     | 1-5   | 4  | QQYDSYPLT   | 9      | -          | -     | c+N      |
| mT1D03 43  | 3-21  | 3-16 | 3  | 4  | GVTTGGCFDY              | 10     | 1-27  | 1  | QKYNAPWT    | 9      | -          | -     | -        |
| mT1D03 48  | 1-18  | 3-16 | 3  | 4  | AGGVGFDY                | 8      | 1-5   | 1  | QQYNSYLWT   | 9      | +          | +     | c+N      |
| mT1D03 54# | 1-18  | 5-5  | 3  | 5  | DLNVDTAMVA              | 10     | 1-27  | 1  | QGET        | 4      |            |       |          |
| mT1D03 56  | 3-9   | 6-13 | 2  | 4  | DMETYSSSWTSFDY          | 14     | 1-5   | 2  | QQYNSYPGT   | 9      | -          | -     | -        |
| mT1D03 62  | 3-21  | 3-22 | 3  | 6  | DKGRIVNYYYYGMDV         | 16     | 1-5   | 1  | QQYNSYSWT   | 9      | -          | -     | -        |
| mT1D03 65  | 3-23  | 2-2  | 2  | 4  | ATLGHCTGSTCYFIDY        | 16     | 3-20  | 4  | QQYGSSHFLT  | 10     | -          | +     | -        |
| mT1D03 70  | 3-7   | 3-22 | 3  | 3  | CGWGITMIVVAQTQEPDDDAFDI | 23     | 1-5   | 1  | QQYNSYPWT   | 9      | -          | -     | -        |
| mT1D03 74  | 4-34  | 4-23 | 3  | 4  | GGGRGATTVVTLGY          | 14     | 1-8   | 2  | QQYYSYPRS   | 9      | -          | +     | -        |
| mT1D03 78  | 3-33  | 6-19 | 2  | 3  | LLDYSSGWNAFDI           | 13     | 1-9   | 3  | QQLNSYP     | 7      | +          | +2    | -        |
| mT1D03 84# | 3-15  | 5-5  | 3  | 4  | VEDTAMVWTDIDY           | 13     | 1-12  | 4  | QQANSFPLT   | 9      |            |       |          |
| mT1D03 93  | 3-23  | 6-19 | 2  | 4  | VRSGWYG                 | 7      | 1-39  | 2  | QQSYSTPLCS  | 10     | +2         | +     | c+N      |
|            | VH    | D    | RF | JH | CDR3 (aa)               | Length | Vλ    | Jλ | CDR3 (aa)   | Length | Poly       | HEp-2 | Staining |
| mT1D03 7   | 3-33  | 5-24 | 2  | 6  | TGRDGYKGNYYYGMDV        | 16     | 3-21  | 2  | QVWDSSSDHVV | 11     | -          | -     | -        |
| mT1D03 49  | 4-39  | 6-19 | 2  | 4  | VTGARASGWYELFGFDY       | 17     | 2-23  | 2  | CSYAGSSTFAV | 11     | +          | +     | -        |
| mT1D03 68  | 4-39  | 3-22 | 2  | 4  | HQRDSSHFDY              | 10     | 2-14  | 1  | SSYTSSSTLYV | 11     | -          | -     | -        |
| mT1D03 78  | 3-33  | 6-19 | 2  | 3  | LLDYSSGWNAFDI           | 13     | 2-14  | 1  | SSYTSSSTL   | 9      | -          | +     | -        |
| mT1D03 79  | 3-9   | 6-13 | 2  | 4  | DKTSSSWYFDY             | 12     | 2-23  | 1  | CSYAGSSTYV  | 10     | -          | +     | c        |

RF, reading frame; #, antibody failed to be expressed

-, non-reactive; +, reactive; +2, highly reactive

c, diffuse cytoplasmic staining; A, actin staining; G, Golgi staining; M, mitochondria staining; MS, mitotic spindle staining; N, nuclear staining; F, cytoplasmic fibers

**Supplemental Table 30** Repertoire and reactivity of antibodies from mature naive B cells of type 1 diabetes patient 4

| Ig        | HEAVY |      |    |    |                       | LIGHT  |      |    |             |        | REACTIVITY |       |          |
|-----------|-------|------|----|----|-----------------------|--------|------|----|-------------|--------|------------|-------|----------|
|           | VH    | D    | RF | JH | CDR3 (aa)             | Length | Vκ   | Jκ | CDR3 (aa)   | Length | Poly       | HEp-2 | Staining |
| mT1D04 1# | 3-74  | 5-5  | 2  | 6  | SDRYSYVDGMDV          | 12     | 1-5  | 1  | QQYNSYSRT   | 9      |            |       |          |
| mT1D04 2  | 3-53  | 4-17 | 2  | 2  | GNDYGILNYWYFDL        | 14     | 1-9  | 3  | QQLNSYPPFT  | 10     | +          | +     | -        |
| mT1D04 3  | 3-7   | 6-19 | 2  | 4  | DRGSGRIDY             | 9      | 2-28 | 2  | MQALQTRYT   | 9      | -          | -     | -        |
| mT1D04 13 | 3-15  | /    | /  | 4  | DLAPRVYENN            | 10     | 1-33 | 3  | QQYDNLPPFT  | 9      | -          | -     | -        |
| mT1D04 14 | 3-9   | 3-22 | 2  | 4  | DPSPYYYDSSGSYFDY      | 16     | 1-39 | 4  | QQSYSTRPLT  | 10     | -          | -     | -        |
| mT1D04 15 | 3-33  | 6-13 | 2  | 4  | VGHTYSSSWRGDFGY       | 15     | 2-28 | 1  | MQALQTPPWT  | 10     | -          | +     | -        |
| mT1D04 18 | 3-30  | 2-2  | 3  | 6  | DLRPPIVVPAAMHDYYYGMDV | 22     | 3-15 | 1  | QQYNNWPPFA  | 10     | -          | +     | -        |
| mT1D04 19 | 3-49  | 3-22 | 2  | 4  | DPYDSSGYPPYFDY        | 15     | 1-5  | 1  | QQYNSYSRT   | 9      | +          | -     | c        |
| mT1D04 21 | 3-11  | 4-17 | 2  | 3  | VQGYGDYWDI            | 10     | 3-15 | 1  | QQYNNWPRT   | 9      | -          | -     | -        |
| mT1D04 23 | 4-28  | 6-19 | 2  | 4  | QGIDSSGWYSFVDY        | 14     | 2-28 | 1  | MQALQTPWT   | 9      | -          | -     | -        |
| mT1D04 28 | 4-34  | 6-13 | 2  | 5  | SIPGGGKSSSQTKNWFDP    | 18     | 3-20 | 4  | QQYGSSTL    | 8      | -          | +     | -        |
| mT1D04 30 | 3-33  | 2-2  | 2  | 6  | DGRYCSSTSCDHYYYYGMDP  | 20     | 3-11 | 1  | QQRSNWPPTWT | 11     | -          | -     | -        |
| mT1D04 31 | 3-21  | 2-21 | 2  | 4  | AGGGDYRFDY            | 10     | 1-33 | 2  | QQYDNL      | 8      | -          | -     | -        |
| mT1D04 32 | 3-30  | 2-8  | 2  | 4  | DRYSLGYCTNGVCPNDFDY   | 19     | 3-15 | 2  | QQYNNWPPYT  | 10     | +          | -     | -        |
| mT1D04 37 | 3-23  | 5-5  | 2  | 4  | EGYGGYSYGYVY          | 13     | 3-11 | 3  | QQRSNWPPIFT | 11     | +          | +     | N        |
| mT1D04 39 | 3-23  | 3-22 | 2  | 4  | DHYDSTGGSDY           | 12     | 3-11 | 4  | QQRSNWGLT   | 9      | -          | -     | -        |
| mT1D04 40 | 3-9   | 6-6  | 2  | 4  | DTPRKIYSSSFDG         | 13     | 1-39 | 3  | QQSYSTPHSA  | 10     | -          | -     | -        |
| mT1D04 41 | 4-34  | 5-5  | 2  | 6  | GLQLRSYGYYYYYGMDV     | 17     | 1-6  | 2  | LQDYNYPRT   | 9      | +          | +2    | c+N      |
| mT1D04 42 | 4-31  | 3-22 | 2  | 1  | AFYDSSGYLGN           | 12     | 2-30 | 1  | MQGTHWPRT   | 9      | -          | +     | -        |
| mT1D04 44 | 3-15  | 6-13 | 2  | 4  | DPYSSSWYNPYFDY        | 14     | 1-33 | 2  | QQYDNLPPYT  | 10     | -          | -     | -        |
| mT1D04 46 | 3-23  | 3-10 | 1  | 6  | DFLWFGELLGGMDV        | 15     | 1-39 | 1  | QQSYSTRWT   | 9      | +          | +     | -        |
|           | VH    | D    | RF | JH | CDR3 (aa)             | Length | Vλ   | Jλ | CDR3 (aa)   | Length | Poly       | HEp-2 | Staining |
| mT1D04 10 | 1-18  | 4-17 | 2  | 4  | GGGLWGLYDYGDIYD       | 16     | 1-44 | 3  | AAWDDSLNGRV | 11     | +          | +     | -        |
| mT1D04 48 | 4-59  | 7-27 | 2  | 4  | TFYWGRIDY             | 9      | 2-23 | 2  | CSYAGSSTIVV | 11     | +          | +     | -        |

RF, reading frame; #, antibody failed to be expressed

-, non-reactive; +, reactive; +2, highly reactive

c, diffuse cytoplasmic staining; A, actin staining; G, Golgi staining; M, mitochondria staining; MS, mitotic spindle staining; N, nuclear staining; F, cytoplasmic fibers

**Supplemental Table 31** Repertoire and reactivity of antibodies from mature naive B cells of type 1 diabetes patient 5

| Ig         | HEAVY |      |    |    |                       |        | LIGHT |    |               |        |      | REACTIVITY |          |  |
|------------|-------|------|----|----|-----------------------|--------|-------|----|---------------|--------|------|------------|----------|--|
|            | VH    | D    | RF | JH | CDR3 (aa)             | Length | Vκ    | Jκ | CDR3 (aa)     | Length | Poly | HEp-2      | Staining |  |
| mT1D05 1   | 3-15  | 3-22 | 2  | 4  | SGSGYYFDY             | 9      | 1-5   | 2  | QQYNSYSYT     | 9      | -    | -          | -        |  |
| mT1D05 2   | 4-31  | /    | /  | 5  | VPPGGWFDP             | 9      | 3-11  | 4  | QQRSNWPPRLT   | 11     | -    | +          | c        |  |
| mT1D05 17# | 3-30  | 2-2  | 3  | 4  | PQDIVVPAAMLIDY        | 15     | 2-30  | 5  | MQGTHWPPS     | 9      |      |            |          |  |
| mT1D05 27  | 3-30  | 3-3  | 1  | 4  | EEWLH                 | 5      | 3-15  | 3  | QQYNNWPPPKFT  | 13     | -    | -          | -        |  |
| mT1D05 32  | 3-33  | 3-10 | 2  | 1  | SPFSQYFQH             | 9      | 1-5   | 2  | QQYNSYPYT     | 9      | -    | -          | -        |  |
| mT1D05 49  | 4-39  | 6-19 | 2  | 1  | ARYSSGSDRVGYFQH       | 15     | 1-39  | 3  | QQSYSTPLFT    | 10     | -    | -          | -        |  |
| mT1D05 52  | 3-11  | 2-15 | 2  | 4  | DLLDGYCSGGSCYSGVDY    | 18     | 2-30  | 1  | MQGTHWPGT     | 9      | -    | -          | -        |  |
| mT1D05 54# | 1-8   | /    | /  | 6  | GTTNYYYYMDV           | 12     | 3-20  | 3  | QQYGSSPFT     | 9      |      |            |          |  |
| mT1D05 56  | 3-23  | 2-15 | 2  | 4  | TEDCSGGSCYFDY         | 14     | 1-39  | 4  | QQSYSTPLT     | 10     | -    | -          | -        |  |
| mT1D05 60  | 3-23  | 4-17 | 2  | 4  | DVSGDYDY              | 8      | 3-15  | 1  | QQYNNWPGT     | 9      | -    | -          | -        |  |
| mT1D05 66  | 1-46  | 4-17 | 2  | 4  | GIGRGLDDYGDYDLDY      | 17     | 1-17  | 2  | LQHNSYPYT     | 9      | -    | -          | -        |  |
| mT1D05 70  | 3-30  | 3-16 | 1  | 4  | DGHLGELSWGYFDY        | 14     | 3-20  | 1  | QQYGSSLWT     | 9      | -    | -          | -        |  |
| mT1D05 74  | 4-39  | /    | /  | 6  | HSSGWDYYYYYGMVDV      | 15     | 3-20  | 3  | QQYGSSLLFT    | 10     | +    | +          | -        |  |
| mT1D05 75  | 3-15  | 3-9  | 1  | 4  | DLPLGLRYFDWLLYENPNFDY | 21     | 3-20  | 1  | QQYGSSPRT     | 9      | +2   | +          | c+N      |  |
| mT1D05 79  | 4-39  | 4-17 |    | 5  | PRTVNSWFDP            | 11     | 3-11  | 5  | QQRNSIT       | 8      | +    | +          | -        |  |
| mT1D05 81  | 3-33  | 2-2  | 1  | 6  | DHEPLLYTEDGMDV        | 14     | 1-5   | 1  | QQYNSYPWT     | 9      | -    | -          | -        |  |
| mT1D05 82  | 3-48  | 4-17 | 2  | 6  | DRRYGDPYYYYGMDV       | 15     | 2-28  | 2  | MQALQTPLYT    | 10     | -    | -          | -        |  |
| mT1D05 84  | 3-21  | 2-15 | 2  | 4  | GLGYCSGGSCYCDY        | 14     | 1-39  | 2  | QQSYSTPRT     | 9      | +    | +          | c+N      |  |
| mT1D05 86  | 3-23  | /    | /  | 4  | GGVYVNDY              | 8      | 3-15  | 1  | QQYNNWPRT     | 9      | -    | +          | A        |  |
| mT1D05 87  | 4-34  | 3-3  | 1  | 4  | GRKRFLWSTIDY          | 13     | 1-5   | 2  | QQYNSYQYT     | 9      | +2   | +          | -        |  |
| mT1D05 93  | 1-18  | 3-10 | 2  | 4  | LGSSIDY               | 7      | 1-39  | 1  | QQSYSTPRT     | 9      | -    | +          | -        |  |
| mT1D05 94  | 4-59  | 6-13 | 3  | 4  | GIAAAGMMALPDYFDY      | 16     | 1-39  | 4  | QQSYSTPLT     | 9      | -    | +          | -        |  |
| mT1D05 72  |       |      |    |    |                       |        | 3-11  | 4  | QQRSNWPLT     | 9      |      |            |          |  |
|            | VH    | D    | RF | JH | CDR3 (aa)             | Length | Vλ    | Jλ | CDR3 (aa)     | Length | Poly | HEp-2      | Staining |  |
| mT1D05 5   | 3-33  | 4-17 | 3  | 4  | ISKTTVTTFGNYFDY       | 15     | 1-40  | 1  | QSYDSSLGSGV   | 11     | -    | +          | N        |  |
| mT1D05 18  | 1-46  | 2-15 | 2  | 4  | DSGVNCSGGSCYSHYFDY    | 18     | 1-40  | 1  | QSYDSSLALYV   | 12     | -    | -          | -        |  |
| mT1D05 19  | 3-64  | /    | /  | 4  | AFPGYFDY              | 8      | 1-51  | 1  | GTWSSLSAYV    | 11     | -    | -          | -        |  |
| mT1D05 21  | 1-18  | 3-16 | 3  | 4  | PSLGGGLDY             | 9      | 2-14  | 3  | SSYTSSSSWV    | 10     | -    | -          | -        |  |
| mT1D05 31  | 3-23  | 6-13 | 1  | 4  | VYHSSQQLVSFIDY        | 15     | 2-14  | 1  | SSYTSSSTLV    | 10     | -    | -          | -        |  |
| mT1D05 36# | 3-33  | 6-19 | 2  | 4  | GRSGWYPDFDY           | 11     | 2-14  | 3  | SSYTSSSTWV    | 10     |      |            |          |  |
| mT1D05 39  | 4-39  | 5-24 | 3  | 4  | LVGEMATILDY           | 11     | 1-47  | 3  | AAWDDSLSGLNWW | 13     | -    | +          | -        |  |
| mT1D05 48  | 3-9   | 6-13 | 2  | 4  | PSSSWAGHISYYFDY       | 15     | 2-23  | 3  | CSYAGSSTWV    | 10     | -    | +          | -        |  |
| mT1D05 50  | 3-15  | 1-1  | 3  | 4  | PTGTFDY               | 7      | 3-25  | 3  | QSADSSGTYEYV  | 11     | -    | -          | -        |  |
| mT1D05 58  | 3-15  | 3-10 | 1  | 6  | SFGELYYYYGMDV         | 13     | 2-11  | 3  | CSYTSSATYPYVW | 13     | +    | +          | -        |  |
| mT1D05 69  | 4-31  | 3-22 | 3  | 4  | EEGGTMIVGY            | 10     | 1-44  | 3  | AAWDDSLNGWV   | 11     | -    | -          | -        |  |
| mT1D05 95  | 3-33  | 3-22 | 2  | 4  | EANYDSSGYYYYFDY       | 15     | 2-14  | 2  | SSYTSSSAYV    | 11     | -    | -          | -        |  |

RF, reading frame; #, antibody failed to be expressed

-, non-reactive; +, reactive; +2, highly reactive

c, diffuse cytoplasmic staining; A, actin staining; G, Golgi staining; M, mitochondria staining; MS, mitotic spindle staining; N, nuclear staining; F, cytoplasmic fibers

**Supplemental Table 32** Repertoire and reactivity of antibodies from mature naive B cells of type 1 diabetes patient 903

| Ig           | HEAVY |      |    |    |                       |        | LIGHT |    |             |        |      |       | REACTIVITY |  |  |
|--------------|-------|------|----|----|-----------------------|--------|-------|----|-------------|--------|------|-------|------------|--|--|
|              | VH    | D    | RF | JH | CDR3 (aa)             | Length | Vκ    | Jκ | CDR3 (aa)   | Length | Poly | HEp-2 | Staining   |  |  |
| mT1D903 10   | 1-2   | 4-23 | 2  | 3  | TNYGGNSVGAFDI         | 13     | 1-39  | 2  | QQSYSTPPYT  | 10     | -    | -     | N          |  |  |
| mT1D903 15κ# | 3-21  | 2-2  | 2  | 6  | EPYYCSSTSCEYEDYYYGMDV | 21     | 3-20  | 4  | QQYGSSPPLT  | 10     |      |       |            |  |  |
| mT1D903 19   | 4-39  | 2-2  | 3  | 5  | QSLNIVVVPAAEWTPFDP    | 18     | 3-20  | 1  | QQYGSSPWT   | 9      | +    | +     | -          |  |  |
| mT1D903 21κ  | 3-11  | /    | /  | 4  | EDKGNDY               | 7      | 1-5   | 1  | QQYNSYFRT   | 9      | -    | +     | c+N        |  |  |
| mT1D903 25   | 4-4   | /    | /  | 5  | GSTAGLQRVGFDP         | 13     | 3-20  | 4  | QQYGSSPWT   | 9      | -    | -     | -          |  |  |
| mT1D903 29#  | 4-34  | 5-24 | 1  | 4  | VREWLRPVDY            | 10     | 4-1   | 1  | QQYYSTPQT   | 9      |      |       |            |  |  |
| mT1D903 30   | 3-23  | 6-19 | 2  | 4  | DQGYSSGWYDY           | 11     | 1-5   | 2  | QQYNSYSRS   | 9      | -    | -     | -          |  |  |
| mT1D903 34#  | 1-3   | 6-6  | 2  | 4  | DSSSSLGRRRGSFDY       | 15     | 3-11  | 5  | QQRSNWPPIT  | 10     |      |       |            |  |  |
| mT1D903 35   | 3-30  | 3-22 | 2  | 2  | DQRYYYDSSGYYSWYFDL    | 18     | 1-5   | 1  | QQYNSYGT    | 8      | -    | +     | -          |  |  |
| mT1D903 40   | 4-34  | 4-17 | 2  | 6  | NLYGDYRRLAYYYYGMDV    | 18     | 3-20  | 1  | QQYGSSPQT   | 9      | +    | +     | c          |  |  |
| mT1D903 41   | 5-51  | 6-19 | 3  | 4  | GPPTTIAVAGTLFDY       | 15     | 4-1   | 2  | QQYYSICS    | 8      | -    | -     | -          |  |  |
| mT1D903 45   | 3-30  | 6-13 | 2  | 3  | SRSSSWYLDAFDI         | 13     | 1-39  | 1  | QQSYSTPPWT  | 10     | -    | -     | -          |  |  |
| mT1D903 04   |       |      |    |    |                       |        | 3-20  | 1  | QQYGSSLWT   | 9      |      |       |            |  |  |
| mT1D903 13   |       |      |    |    |                       |        | 1-9   | 2  | QQLKERS     | 7      |      |       |            |  |  |
| mT1D903 22   |       |      |    |    |                       |        | 1-39  | 1  | QQSYSTPWT   | 9      |      |       |            |  |  |
|              | VH    | D    | RF | JH | CDR3 (aa)             | Length | Vλ    | Jλ | CDR3 (aa)   | Length | Poly | HEp-2 | Staining   |  |  |
| mT1D903 11   | 4-39  | 5-5  | 2  | 4  | DGSYGTRVFDY           | 11     | 2-14  | 3  | SSYTSSSTRV  | 10     | -    | -     | -          |  |  |
| mT1D903 14   | 3-73  | 3-9  | 2  | 4  | VGGDYDILTYYSFDY       | 16     | 1-47  | 2  | AAWDDSLSGHV | 12     | +    | -     | -          |  |  |
| mT1D903 15λ  |       |      |    |    | see kappa             |        | 2-11  | 2  | CSYAGSYTFKV | 11     | +    | -     | N          |  |  |
| mT1D903 17   | 3-21  | 6-13 | 2  | 6  | VQSRYSWYGPYYYYYGGMDV  | 22     | 2-11  | 2  | CSYAGSYTSV  | 10     | +2   | +2    | M          |  |  |
| mT1D903 20   | 5-51  | 4-17 | 3  | 4  | HPPTMTTVTGFDY         | 14     | 3-1   | 2  | QAWDSSTVV   | 9      | -    | +     | -          |  |  |
| mT1D903 21λ# |       |      |    |    | see kappa             |        | 1-47  | 2  | AAWDDSLSGHV | 12     |      |       |            |  |  |
| mT1D903 26#  | 3-20  | 2-8  | 3  | 4  | DGGIVLMVYAKGFDY       | 15     | 2-23  | 1  | CSYAGSSTYV  | 10     |      |       |            |  |  |
| mT1D903 42#  | 3-64  | 3-3  | 3  | 6  | DRGITIFGVVTRYGMDV     | 17     | 7-43  | 3  | LLYYGGAWV   | 9      |      |       |            |  |  |
| mT1D903 24   |       |      |    |    |                       |        | 2-23  | 2  | CSYAGSSTVV  | 10     |      |       |            |  |  |

RF, reading frame; #, antibody failed to be expressed

-, non-reactive; +, reactive; +2, highly reactive

c, diffuse cytoplasmic staining; A, actin staining; G, Golgi staining; M, mitochondria staining; MS, mitotic spindle staining; N, nuclear staining; F, cytoplasmic fibers

**Supplemental Table 33** Repertoire and reactivity of antibodies from mature naive B cells of type 1 diabetes patient 929

| Ig          | HEAVY  |      |    |    |                     | LIGHT  |      |    |             |        | REACTIVITY |       |          |
|-------------|--------|------|----|----|---------------------|--------|------|----|-------------|--------|------------|-------|----------|
|             | VH     | D    | RF | JH | CDR3 (aa)           | Length | Vκ   | Jκ | CDR3 (aa)   | Length | Poly       | HEp-2 | Staining |
| mT1D929 06  | 4-59   | 2-2  | 2  | 5  | APRYCSSTSCYKGFDP    | 17     | 1-39 | 1  | QQSYSTPRET  | 10     | +          | +     | F        |
| mT1D929 07# | 3-53   | 6-19 | 2  | 4  | ALRAGYSSGWYFDY      | 15     | 3-11 | 5  | QQRSNWPPIT  | 10     |            |       |          |
| mT1D929 12  | 1-18   | 6-19 | 3  | 4  | GGNSVAFDY           | 9      | 1-5  | 4  | QQYNSYPLT   | 9      | -          | -     | -        |
| mT1D929 19# | 3-23   | 3-16 | 2  | 6  | VLGDYDYVWGSSDGMVDV  | 17     | 3-15 | 1  | QQYNNWPPRGT | 11     |            |       |          |
| mT1D929 24# | 4-39   | 3-10 | 2  | 4  | QRYYYGSGDY          | 10     | 3-15 | 2  | QQYNNWPACS  | 10     |            |       |          |
| mT1D929 25κ | 7-4-1  | 3-22 | 2  | 4  | DSQDSSGYHSHFDY      | 14     | 2-28 | 4  | MQALQLT     | 7      | -          | +     | -        |
| mT1D929 28  | 3-15   | 2-2  | 1  | 4  | DQLLS               | 5      | 2-30 | 2  | MQGTHWPRT   | 9      | -          | -     | -        |
| mT1D929 29  | 4-39   | 3-22 | 2  | 3  | ERFDDSSGYLAGAFDI    | 17     | 3-11 | 1  | QQRSNWRT    | 8      | -          | -     | -        |
| mT1D929 31  | 3-21   | 2-2  | 3  | 4  | DGAVVPAADY          | 12     | 3-20 | 2  | QQYGSSPMYT  | 10     | -          | +     | N+c      |
| mT1D929 32  | 4-30-4 | 6-13 | 1  | 4  | EQQLVHAFDY          | 11     | 1-39 | 2  | QQSYSTPYT   | 9      | -          | -     | -        |
| mT1D929 33  | 3-9    | 1-20 | 3  | 6  | DMGAWVTGTTGRGGDYMDV | 20     | 1-12 | 3  | QQANSFPFT   | 9      | -          | -     | -        |
| mT1D929 34# | 4-4    | 3-10 | 3  | 4  | ARTMSFDY            | 8      | 3-11 | 1  | QQRSNWPPEGT | 11     |            |       |          |
| mT1D929 38# | 4-59   | 6-13 | 2  | 6  | GKLLSWYYGMDV        | 12     | 1-39 | 1  | QQSYSTPDVA  | 10     |            |       |          |
| mT1D929 39κ | 4-59   | 1-26 | 3  | 4  | LSRIVGATHDY         | 11     | 3-15 | 4  | QQYNNWPPLT  | 10     | +          | +     | -        |
| mT1D929 42  | 1-8    | 1-26 | 2  | 3  | GWSGSYGGDAFDI       | 14     | 1-5  | 2  | QQYNSYLMCS  | 10     | -          | -     | -        |
| mT1D929 46  | 3-48   | 5-12 | 3  | 6  | DIKVATIGVPFYYYMDV   | 19     | 3-20 | 1  | QQYGSSPPWT  | 10     | +          | +     | -        |
| mT1D929 48# | 1-2    | 3-22 | 2  | 3  | DKGSSGYSALGAFDI     | 15     | 3-20 | 2  | QQYGSSPHT   | 9      |            |       |          |
|             | VH     | D    | RF | JH | CDR3 (aa)           | Length | Vλ   | Jλ | CDR3 (aa)   | Length | Poly       | HEp-2 | Staining |
| mT1D929 01  | 3-33   | 5-5  | 3  | 6  | DINVDTATSSVLDV      | 14     | 2-14 | 2  | SSYTSSTSVV  | 11     | -          | -     | -        |
| mT1D929 04  | 1-46   | 3-22 | 2  | 4  | DLAPNYDSSGYRSETTDDY | 21     | 1-47 | 2  | AAWDDSLSGHV | 12     | -          | +     | -        |
| mT1D929 10  | 3-48   | /    | /  | 4  | LVIRSDYFDY          | 10     | 1-51 | 2  | GTWDSLSAVV  | 11     | -          | -     | -        |
| mT1D929 14# | 3-9    | 3-3  | 1  | 6  | DLTVRFLGPSYYYGMDV   | 17     | 2-11 | 3  | CSYAGSYTWV  | 10     |            |       |          |
| mT1D929 25λ |        |      |    |    | see kappa           |        | 3-1  | 2  | QAWDSSPNVV  | 10     | -          | -     | -        |
| mT1D929 26  | 1-8    | 3-3  | 2  | 4  | ADDFWSGYWD          | 10     | 3-1  | 2  | QAWDSSSTVV  | 9      | -          | -     | -        |
| mT1D929 30# | 1-18   | 3-9  | 2  | 4  | GGSLRALDLDY         | 12     | 2-23 | 3  | CSYAGSSTLV  | 10     |            |       |          |
| mT1D929 39λ |        |      |    |    | see kappa           |        | 1-51 | 7  | GTWDSLFAV   | 10     | +          | -     | -        |
| mT1D929 44  | 4-39   | 3-10 | 3  | 5  | HPTSERVRGVPRGGWFDV  | 18     | 1-40 | 2  | QSYDSSLSGSV | 11     | -          | -     | -        |
|             | VH     | D    | RF | JH | CDR3 (aa)           | Length |      |    |             |        |            |       |          |
| mT1D929 02  | 3-66   | 3-3  | 2  | 6  | DSLSGDFWSGYRYYYGMDV | 21     |      |    |             |        |            |       |          |
| mT1D929 13  | 1-3    | 2-2  | 3  | 5  | DRGIVVPAATVGFDP     | 17     |      |    |             |        |            |       |          |
| mT1D929 15  | 3-43   | 6-13 | 3  | 6  | DSIAAEAAYGMDV       | 13     |      |    |             |        |            |       |          |
| mT1D929 27  | 3-23   | 3-3  | 2  | 6  | VFWSGYYPQVYYYGMDV   | 18     |      |    |             |        |            |       |          |
| mT1D929 41  | 3-23   | /    | /  | 3  | VGGKSTSHGAFDI       | 13     |      |    |             |        |            |       |          |

RF, reading frame; #, antibody failed to be expressed

-, non-reactive; +, reactive; +2, highly reactive

c, diffuse cytoplasmic staining; A, actin staining; G, Golgi staining; M, mitochondria staining; MS, mitotic spindle staining; N, nuclear staining; F, cytoplasmic fibers

**Supplemental Table 34** Repertoire and reactivity of antibodies from mature naive B cells of type 1 diabetes patient 430

| Ig          | HEAVY  |      |    |    |                        | LIGHT  |      |    |              |        | REACTIVITY |       |          |
|-------------|--------|------|----|----|------------------------|--------|------|----|--------------|--------|------------|-------|----------|
|             | VH     | D    | RF | JH | CDR3 (aa)              | Length | Vκ   | Jκ | CDR3 (aa)    | Length | Poly       | HEp-2 | Staining |
| mT1D430 01  | 3-30   | 2-2  | 2  | 4  | GGRLLGYCSSTSCYFPDY     | 18     | 3-11 | 4  | QQRSNWPLT    | 9      | -          | -     | -        |
| mT1D430 02  | 4-31   | 6-6  | 3  | 4  | VMGIAARSRYFFDY         | 14     | 3-20 | 4  | QQYGSSPALT   | 10     | +          | +     | F        |
| mT1D430 06# | 3-23   | 1-26 | 2  | 2  | ARVPYSGSYWYFDL         | 14     | 3-20 | 4  | QQYGSSLT     | 8      |            |       |          |
| mT1D430 07# | 4-34   | 2-2  | 2  | 3  | VWKRVSVKYCSSTSCYRDAFDI | 22     | 1-39 | 1  | QQSYSTLWS    | 9      |            |       |          |
| mT1D430 12  | 1-69   | /    | /  | 4  | DHDGLGGTDY             | 10     | 1-39 | 1  | QQSYSTPRT    | 9      | +          | +     | -        |
| mT1D430 19  | 4-39   | 3-10 | 3  | 4  | RSFSSSMVQGGGYFFDY      | 17     | 1-5  | 1  | QQYNSYVGT    | 9      | +          | +     | -        |
| mT1D430 20  | 4-4    | 2-2  | 3  | 5  | DFGVVPAAIWGFDP         | 16     | 1-9  | 4  | QLNSYPPA     | 9      | +          | +     | -        |
| mT1D430 23  | 3-11   | 3-10 | 2  | 4  | EAPYSGSYVVDY           | 13     | 1-39 | 2  | QQSYSTPYT    | 9      | -          | +     | -        |
| mT1D430 26# | 5-a    | 3-16 | 2  | 4  | LPSDYIWGSYREFDY        | 15     | 1-5  | 3  | QQYNSYSH     | 8      |            |       |          |
| mT1D430 27  | 1-58   | 5-5  | 2  | 4  | LYSYFDY                | 7      | 1-39 | 4  | QQSYSTPRT    | 9      | +          | +     | -        |
| mT1D430 28  | 4-30-2 | 3-22 | 3  | 6  | AVVSRGGYYYYYMDV        | 15     | 1-5  | 5  | QQYNSYPIT    | 9      | +2         | +     | -        |
| mT1D430 31# | 1-46   | 2-2  | 3  | 6  | DPGVVPAATYYYYYMDV      | 19     | 3-20 | 4  | QQYGSSPPLT   | 10     |            |       |          |
| mT1D430 33  | 3-23   | 3-10 | 2  | 4  | DREGYSGSYFFY           | 13     | 3-11 | 5  | QQRSNWRVT    | 9      | -          | -     | -        |
| mT1D430 34# | 1-2    | 3-9  | 2  | 5  | GDYDILTGYNANYWFDP      | 19     | 3-11 | 3  | QQRSNWL      | 7      |            |       |          |
| mT1D430 35  | 3-30-3 | 1-26 | 2  | 4  | LYSGRPFYD              | 9      | 1-17 | 1  | LQHNSYPWT    | 9      | +          | +     | -        |
| mT1D430 39  | 4-30-4 | 2-2  | 2  | 4  | VPYCSSTSCYLLIFDY       | 16     | 4-1  | 1  | QQYSTPPT     | 9      | -          | -     | -        |
| mT1D430 40  | 3-30   | 4-4  | 3  | 6  | EVTTEMGKYYYYYMDV       | 16     | 1-9  | 2  | QLNSYPPKYT   | 11     | -          | +     | -        |
| mT1D430 43  | 1-24   | 4-17 | 2  | 4  | DRDGDYSPFDY            | 11     | 3-20 | 4  | QQYGSSPLT    | 9      | -          | -     | -        |
| mT1D430 09  |        |      |    |    |                        |        | 1-27 | 1  | QKYNAPRT     | 9      |            |       |          |
|             | VH     | D    | RF | JH | CDR3 (aa)              | Length | Vλ   | Jλ | CDR3 (aa)    | Length | Poly       | HEp-2 | Staining |
| mT1D430 05  | 3-15   | 6-13 | 2  | 6  | GHSSSWYTYYYYYMDV       | 17     | 1-44 | 2  | AAWDDSLNGVV  | 11     | +          | -     | -        |
| mT1D430 15  | 1-24   | 6-19 | 2  | 3  | VSSGWYPNDAFDI          | 13     | 1-44 | 2  | AAWDDSLNGVV  | 11     | -          | -     | -        |
| mT1D430 16  | 3-15   | /    | /  | 4  | DWGWVWRWTAEDY          | 12     | 2-14 | 2  | SSYTSSTLKV   | 11     | +          | +     | -        |
| mT1D430 25  | 1-46   | 4-23 | 2  | 4  | EDYGGNPFVFDY           | 12     | 1-40 | 1  | QSYDSSLGYYV  | 11     | -          | -     | -        |
| mT1D430 32  | 4-34   | 4-17 | 3  | 4  | GFRKGRVTTVTTPTPSFDY    | 19     | 2-23 | 1  | CSYAGSSTSFYV | 12     | +          | +     | -        |
| mT1D430 46  | 4-39   | 4-17 | 2  | 4  | QVGYGDYISGGNYFDY       | 16     | 3-1  | 2  | QAWDSSTHV    | 10     | -          | -     | -        |

RF, reading frame; #, antibody failed to be expressed

-, non-reactive; +, reactive; +2, highly reactive

c, diffuse cytoplasmic staining; A, actin staining; G, Golgi staining; M, mitochondria staining; MS, mitotic spindle staining; N, nuclear staining; F, cytoplasmic fibers



**Supplemental Table 35** Repertoire and reactivity of antibodies from new emigrant B cells of type 2 diabetes patient 1

| Ig           | HEAVY |      |    |    |                         | LIGHT  |       |    |              | REACTIVITY |      |       |          |
|--------------|-------|------|----|----|-------------------------|--------|-------|----|--------------|------------|------|-------|----------|
|              | VH    | D    | RF | JH | CDR3 (aa)               | Length | Vκ    | Jκ | CDR3 (aa)    | Length     | Poly | HEp-2 | Staining |
| neT2D01 05   | 4-59  | 3-10 | 2  | 4  | ANYYGSGSYFFDY           | 13     | 1-5   | 4  | QQYNSYPLT    | 9          | -    | -     | -        |
| neT2D01 08#  | 3-30  | /    | /  | 3  | TPGTNAFDI               | 9      | 1-39  | 1  | QSYSTPHWT    | 10         |      |       |          |
| neT2D01 14κ# | 1-18  | 3-10 | 1  | 6  | DQPLLERFGELLAPNYYYYYMDV | 23     | 1D-43 | 4  | QQYYSTPPA    | 9          |      |       |          |
| neT2D01 18#  | 1-69  | 3-10 | 3  | 2  | DQGVWPYFDL              | 10     | 3-15  | 1  | QQYNNWPGT    | 9          |      |       |          |
| neT2D01 21   | 3-66  | 5-12 | 3  | 4  | DLGATISGDDY             | 11     | 1D-17 | 1  | LQHNSLTWT    | 9          | -    | -     | -        |
| neT2D01 22   | 3-9   | 4-17 | 2  | 4  | LSGDYGFYD               | 9      | 1-8   | 2  | QQYYSYPYT    | 9          | -    | -     | -        |
| neT2D01 25   | 4-39  | 3-22 | 2  | 1  | NQPSYYYDSSGYLAEYFQH     | 20     | 3-11  | 4  | QQRSNWLT     | 8          | -    | +     | -        |
| neT2D01 28κ# | 4-34  | 4-17 | 2  | 4  | APQDGLDSESFDY           | 13     | 3-11  | 2  | QQRSNWPRT    | 9          |      |       |          |
| neT2D01 30   | 4-59  | 6-19 | 2  | 5  | EGGGWYSENWFDP           | 13     | 3-20  | 2  | QQYGSSPYT    | 9          | -    | +     | -        |
| neT2D01 40   | 4-4   | 3-22 | 2  | 5  | GNYYDSSGYYSNWFDP        | 16     | 1-5   | 3  | QQYNSYSPLFT  | 11         | +    | +     | -        |
| neT2D01 41   | 3-21  | 3-22 | 2  | 4  | DGFHNYDSSGYYYYFDY       | 18     | 3-20  | 1  | QQYGSSSTGT   | 9          | -    | -     | -        |
| neT2D01 43   | 4-59  | 5-24 | 2  | 4  | GDGYNYFFDY              | 10     | 3-15  | 1  | QQYNNWPPWT   | 10         | -    | -     | -        |
| neT2D01 45#  | 1-69  | 3-10 | 2  | 5  | PYSGSFLTQS              | 11     | 1-16  | 1  | QQYNSYPLT    | 9          |      |       |          |
| neT2D01 47   | 3-30  | 5-5  | 2  | 4  | GGIYNDYWDY              | 11     | 3-15  | 2  | QQYNNWPPYT   | 10         | -    | -     | -        |
| neT2D01 48   | 1-46  | 3-22 | 2  | 4  | DPIYDSSGLTAD            | 12     | 3-20  | 3  | QQYGSSPPIT   | 10         | -    | -     | -        |
| neT2D01 49   | 4-59  | 5-5  | 2  | 4  | DPGYSYGHYD              | 10     | 3-20  | 2  | QQYGSSSYT    | 9          | -    | -     | -        |
| neT2D01 53   | 1-69  | 5-5  | 3  | 4  | KADTAMV                 | 7      | 3-11  | 2  | QQRSNWPPAGYT | 12         | -    | +     | -        |
| neT2D01 54   | 5-51  | 3-22 | 2  | 5  | TGYDSSGYSELGWFD         | 16     | 3-20  | 1  | QQYGSSPWT    | 9          | -    | -     | -        |
| neT2D01 57   | 3-30  | 3-9  | 2  | 4  | DPDILTGYSVWAY           | 14     | 1-5   | 1  | QQYNSYLWT    | 9          | -    | -     | -        |
| neT2D01 58#  | 3-48  | /    | /  | 4  | EEGPWSGVYD              | 10     | 1-9   | 4  | QQLNSYPLT    | 9          |      |       |          |
| neT2D01 61   | 3-74  | 3-3  | 2  | 6  | EGDFWSGPPQYYYYYGMV      | 20     | 3-11  | 2  | QQRSNWLYT    | 9          | -    | -     | -        |
| neT2D01 63   | 4-34  | 4-23 | 1  | 4  | GRVRWSISDY              | 10     | 3-20  | 1  | QQYGSSPRT    | 9          | -    | +     | -        |
| neT2D01 64   | 4-4   | 3-16 | 3  | 5  | ERITFGGIVISGWFD         | 16     | 1-39  | 4  | QSYSTPLT     | 9          | -    | -     | -        |
| neT2D01 50   |       |      |    |    |                         |        | 1-12  | 2  | QQANSFPHT    | 9          |      |       |          |
|              | VH    | D    | RF | JH | CDR3 (aa)               | Length | Vλ    | Jλ | CDR3 (aa)    | Length     | Poly | HEp-2 | Staining |
| neT2D01 10   | 3-33  | 3-22 | 2  | 4  | GAYYYDSSGYTLDY          | 15     | 6-57  | 3  | QSYDSSTHWV   | 10         | -    | -     | -        |
| neT2D01 11#  | 1-3   | 5-24 | 2  | 4  | GSRDGYSYFDY             | 11     | 3-1   | 2  | QAWDSSTRV    | 10         |      |       |          |
| neT2D01 12   | 5-51  | 5-5  | 1  | 5  | IQNPTNNWFDP             | 11     | 3-1   | 2  | QAWDSSTAV    | 9          | -    | +     | -        |
| neT2D01 14λ  |       |      |    |    | see kappa               |        | 6-57  | 3  | QSYDSSNHGRV  | 11         | +    | +     | -        |
| neT2D01 15   | 4-39  | 2-21 | 2  | 4  | HGSGAYCGGDCYFFDY        | 16     | 2-14  | 2  | SSYTSSSTV    | 10         | -    | -     | -        |
| neT2D01 17   | 3-48  | 3-22 | 2  | 3  | ELGSSGTTELILAFDI        | 16     | 1-36  | 2  | AAWDDSLNGV   | 11         | +2   | +     | c+N      |
| neT2D01 24   | 4-39  | 5-12 | 2  | 4  | TSGYDSVY                | 8      | 7-46  | 3  | LLSYSGAWV    | 9          | -    | +     | -        |
| neT2D01 28λ# |       |      |    |    | see kappa               |        | 1-47  | 3  | AAWDDSLSGRV  | 11         |      |       |          |
| neT2D01 31   | 3-33  | /    | /  | 3  | HPERLDAFDI              | 10     | 3-1   | 1  | QAWDSSTYV    | 9          | -    | +     | -        |
| neT2D01 36#  | 3-48  | 3-16 | 1  | 6  | DGGLGTYGMDV             | 11     | 3-1   | 2  | QAWDSSTRV    | 9          |      |       |          |
| neT2D01 37   | 1-46  | 3-22 | 2  | 3  | VPQYYDRGDAFDI           | 14     | 1-40  | 3  | QSYDSSLSGWV  | 11         | -    | -     | N        |
| neT2D01 38   | 3-11  | 3-10 | 2  | 5  | DISISSGWFD              | 11     | 2-11  | 3  | CSYAGSYTRWV  | 11         | -    | -     | -        |
| neT2D01 46   | 4-39  | 3-22 | 2  | 4  | TRGEYYYDSSYDY           | 13     | 1-44  | 1  | AAWDDSLNGHYV | 12         | -    | -     | -        |
| neT2D01 52   | 4-59  | 3-10 | 2  | 4  | DGGSGSYAGNFDY           | 13     | 2-14  | 1  | SSYTSSSAYV   | 10         | -    | -     | -        |
| neT2D01 59   | 4-39  | 3-10 | 2  | 4  | HYGSGSYRYFFDY           | 14     | 1-51  | 1  | GTWSSLSAYV   | 11         | -    | -     | c        |
| neT2D01 62   | 1-69  | 2-8  | 3  | 5  | MVQNWFDP                | 8      | 2-14  | 3  | SSYTSSSTWV   | 10         | -    | -     | -        |
| neT2D01 23   |       |      |    |    |                         |        | 1-44  | 2  | AAWDDSLNGPV  | 11         |      |       |          |
|              | VH    | D    | RF | JH | CDR3 (aa)               | Length |       |    |              |            |      |       |          |
| neT2D01 09   | 3-43  | 6-19 | 3  | 6  | DIRAVAGTYPRYGMV         | 18     |       |    |              |            |      |       |          |
| neT2D01 27   | 3-73  | 3-10 | 2  | 5  | HDYYGSGSRVLP            | 12     |       |    |              |            |      |       |          |
| neT2D01 26   | 4-39  | 3-10 | 2  | 4  | YTSYSDYYGSGSYGAY        | 16     |       |    |              |            |      |       |          |
| neT2D01 29   | 3-43  | 2-15 | 2  | 4  | TVCSSGSCYNYFFDY         | 16     |       |    |              |            |      |       |          |
| neT2D01 32   | 3-33  | 1-26 | 1  | 4  | DGEWELLHYFDY            | 12     |       |    |              |            |      |       |          |
| neT2D01 42   | 3-33  | 3-10 | 3  | 4  | DASDITMVRGVIDY          | 14     |       |    |              |            |      |       |          |
| neT2D01 60   | 3-30  | 3-10 | 3  | 5  | DRGHITMARPPASNWFDP      | 18     |       |    |              |            |      |       |          |

RF, reading frame; #, antibody failed to be expressed

-, non-reactive; +, reactive; +2, highly reactive

c, diffuse cytoplasmic staining; A, actin staining; G, Golgi staining; M, mitochondria staining; MS, mitotic spindle staining; N, nuclear staining; F, cytoplasmic fibers

**Supplemental Table 36** Repertoire and reactivity of antibodies from new emigrant B cells of type 2 diabetes patient 2

| Ig           | HEAVY |             |        |    |                    | Length | LIGHT |    |               |        | Length | REACTIVITY |          |  |
|--------------|-------|-------------|--------|----|--------------------|--------|-------|----|---------------|--------|--------|------------|----------|--|
|              | VH    | D           | RF     | JH | CDR3 (aa)          |        | Vκ    | Jκ | CDR3 (aa)     | Poly   |        | HEp-2      | Staining |  |
| neT2D02 05   | 3-30  | 6-19        | 3      | 4  | GGDSAVAGYFDY       | 12     | 4-1   | 4  | QQYYSTLLLT    | 10     | -      | -          | -        |  |
| neT2D02 09   | 3-43  | 3-16        | 2      | 4  | DIGGDDYVWGSAGGDDY  | 17     | 1-8   | 3  | QQYYSYPLT     | 9      | -      | -          | -        |  |
| neT2D02 14   | 3-30  | 2-2         | 2      | 4  | DLGCSSTSCWGPAPFDY  | 16     | 3-15  | 4  | QQYNNWPPLT    | 10     | -      | -          | c        |  |
| neT2D02 15   | 4-4   | /           | /      | 2  | ALEIGYWYFDL        | 11     | 3-11  | 4  | QQRSNWPPLT    | 10     | -      | +          | -        |  |
| neT2D02 17   | 3-48  | 3-10        | 1      | 4  | DKGKLVLFWFGELSHFDY | 17     | 2-28  | 1  | MQALQTPWT     | 9      | -      | +          | -        |  |
| neT2D02 24   | 1-2   | 3-22        | 2      | 4  | RAYDSSSGYGSPPHYFDY | 17     | 4-1   | 3  | QQYYSTPLT     | 9      | -      | +          | -        |  |
| neT2D02 29   | 4-34  | 1-26        | 3      | 5  | GDBGVVGATMVNWFDP   | 15     | 1-13  | 4  | QQFNYSYPLT    | 9      | -      | -          | -        |  |
| neT2D02 39   | 4-39  | 5-24        | 3      | 4  | LAVEMATITPDY       | 12     | 2-30  | 5  | MQGTHWPIT     | 9      | -      | -          | -        |  |
| neT2D02 40   | 3-33  | 6-19        | 2      | 4  | DMSYSSGWYGPFDY     | 14     | 3-20  | 4  | QQYGSSPLT     | 9      | -      | -          | -        |  |
| neT2D02 51κ  | 3-33  | /           | /      | 4  | ERVGCFDY           | 8      | 3-15  | 1  | QQYNNWPSWT    | 10     | +      | +          | c+N      |  |
| neT2D02 54   | 4-34  | 3-9         | 2      | 4  | RHYDILTYGYEDY      | 13     | 2-28  | 4  | MQALQTPHT     | 9      | +      | +          | -        |  |
| neT2D02 64#  | 3-11  | 6-19        | 3      | 3  | EPRIAVAGTHAFDI     | 14     | 3-15  | 3  | QQYNNWRRRA    | 9      |        |            |          |  |
| neT2D02 74   | 3-64  | 2-2         | 2      | 6  | GPYCSSTSCPDYYYGMDV | 19     | 2-30  | 1  | MQGTHWPPL     | 9      | -      | -          | -        |  |
| neT2D02 75   | 1-24  | 6-19        | 2      | 4  | DRIGSGWDFDY        | 11     | 2-40  | 3  | MQRIEFPCTT    | 10     | -      | +          | -        |  |
| neT2D02 76κ# | 7-81  | 5-5         | 1      | 4  | GFNEQLWYVDIDY      | 13     | 3-20  | 4  | QQYGSSALT     | 9      |        |            |          |  |
| neT2D02 81   | 3-21  | 5-12        | 3      | 6  | DGGVATIYSYYMDV     | 15     | 3-20  | 4  | QQYGSSLT      | 8      | -      | +          | -        |  |
| neT2D02 82   | 3-7   | 2-2<br>3-16 | 3<br>2 | 4  | TLVPDAISYDYVWGIPH  | 17     | 1-5   | 2  | QQYNSYPYT     | 9      | -      | -          | -        |  |
| neT2D02 83κ  | 4-39  | /           | /      | 5  | HPTLNNPNPANPENWFDP | 18     | 1-13  | 4  | QQFNYSYPLT    | 9      | -      | -          | -        |  |
| neT2D02 96   | 4-4   | 4-17        | 2      | 4  | VYDYGDYGRGFFDY     | 14     | 1-8   | 1  | QQYYSYPRT     | 9      | -      | -          | -        |  |
| neT2D02 12   |       |             |        |    |                    |        | 3-15  | 1  | QQYNNWQT      | 8      |        |            |          |  |
| neT2D02 46   |       |             |        |    |                    |        | 1-39  | 5  | QQSYSTIT      | 8      |        |            |          |  |
| neT2D02 47   |       |             |        |    |                    |        | 2-28  | 4  | MQALQTPLT     | 9      |        |            |          |  |
| neT2D02 94   |       |             |        |    |                    |        | 1-12  | 4  | QQANSFPLA     | 9      |        |            |          |  |
|              | VH    | D           | RF     | JH | CDR3 (aa)          | Length | Vλ    | Jλ | CDR3 (aa)     | Length | Poly   | HEp-2      | Staining |  |
| neT2D02 03   | 4-4   | 5-5         | 2      | 6  | GQRGYSYGDYYYYYMDV  | 17     | 1-51  | 2  | GTWDSLSLSPDVV | 12     | -      | -          | -        |  |
| neT2D02 18#  | 1-18  | /           | /      | 4  | DDNSAFDY           | 8      | 2-14  | 3  | SSYTSSSTLV    | 10     |        |            |          |  |
| neT2D02 28   | 3-53  | /           | /      | 6  | EWGRSGSYYYGMDV     | 14     | 1-47  | 2  | AAWDDSLSGRV   | 11     | -      | -          | -        |  |
| neT2D02 31   | 4-34  | 3-3         | 2      | 4  | RYSAYDFWGSYYEFDY   | 16     | 1-44  | 3  | AAWDDSLNGPNWV | 13     | -      | +          | -        |  |
| neT2D02 32   | 4-39  | 3-9         | 2      | 4  | SRPYDILTGYFFDY     | 14     | 3-9   | 2  | QVWDSIDVV     | 10     | -      | -          | -        |  |
| neT2D02 45   | 3-21  | 3-22        | 2      | 4  | GYDSSVPYFFDY       | 12     | 1-51  | 1  | GTWDSLSAYV    | 11     | -      | -          | -        |  |
| neT2D02 51λ  |       |             |        |    | see kappa          |        | 1-51  | 3  | GTWDSLSAGPWV  | 13     | -      | -          | -        |  |
| neT2D02 56   | 7-81  | 3-22        | 2      | 4  | VNDDSSGYADY        | 11     | 1-44  | 3  | AAWDDSLNEGV   | 11     | -      | -          | -        |  |
| neT2D02 67   |       | 4-23        | 2      | 3  | SHDYGGQPGAFDI      | 13     | 1-44  | 3  | AAWDDSLNGWV   | 11     | -      | -          | -        |  |
| neT2D02 73   | 5-51  | 5-24        | 3      | 4  | HDEMATIGPTDY       | 12     | 1-47  | 3  | AAWDDSLSGLNWV | 13     | -      | -          | -        |  |
| neT2D02 76λ  |       |             |        |    | see kappa          |        | 2-11  | 2  | CSYAGSYTVV    | 10     | -      | +          | -        |  |
| neT2D02 83λ  |       |             |        |    | see kappa          |        | 3-1   | 2  | QAWDSSTVV     | 9      | -      | +          | -        |  |
| neT2D02 87   |       |             |        |    |                    |        | 1-44  | 3  | AAWDDSLNGWV   | 11     |        |            |          |  |
|              | VH    | D           | RF     | JH | CDR3 (aa)          | Length |       |    |               |        |        |            |          |  |
| neT2D02 08   | 3-33  | 3-10        | 1      | 4  | QELLWFGEHTGVDY     | 14     |       |    |               |        |        |            |          |  |
| neT2D02 22   | 3-23  | 4-23        | 3      | 4  | PSTVVDSDPSAIDY     | 14     |       |    |               |        |        |            |          |  |
| neT2D02 53   | 4-34  | 3-22        | 3      | 3  | ASITMIVGDAFDI      | 13     |       |    |               |        |        |            |          |  |
| neT2D02 58   | 3-48  | 5-5         | 2      | 4  | VGVSGYSYGLVDY      | 13     |       |    |               |        |        |            |          |  |
| neT2D02 80   | 1-2   | 2-2         | 3      | 6  | EVVPAAMDYYYGMDV    | 16     |       |    |               |        |        |            |          |  |

RF, reading frame; #, antibody failed to be expressed

-, non-reactive; +, reactive; +2, highly reactive

c, diffuse cytoplasmic staining; A, actin staining; G, Golgi staining; M, mitochondria staining; MS, mitotic spindle staining; N, nuclear staining; F, cytoplasmic fibers

Supplemental Table 37 Repertoire and reactivity of antibodies from mature naive B cells of type 2 diabetes patient 1

| Ig          | HEAVY |      |    |    |                       | LIGHT  |                |                |             |        | REACTIVITY |       |          |
|-------------|-------|------|----|----|-----------------------|--------|----------------|----------------|-------------|--------|------------|-------|----------|
|             | VH    | D    | RF | JH | CDR3 (aa)             | Length | V <sub>k</sub> | J <sub>k</sub> | CDR3 (aa)   | Length | Poly       | HEp-2 | Staining |
| mT2D01 04   | 3-11  | 2-2  | 2  | 4  | PHCSSTSCYTY           | 11     | 2-28           | 1              | MQALQTSWT   | 9      | -          | -     | -        |
| mT2D01 06#  | 1-3   | 4-17 | 3  | 6  | GPVTTYYYYYYMDV        | 14     | 1-33           | 1              | QQYDNLPP    | 8      | -          | -     | -        |
| mT2D01 07   | 4-59  | /    | /  | 6  | DWSPPGVNYYYGMDV       | 15     | 1-39           | 4              | QQSYSTPLT   | 9      | -          | -     | -        |
| mT2D01 15   | 4-34  | 3-10 | 3  | 4  | RVRGVIPFDY            | 10     | 3-20           | 1              | QQYGSSPRT   | 9      | -          | +     | -        |
| mT2D01 16#  | 1-69  | 2-8  | 2  | 6  | VRVNNGVCYQCPLLYYGMVDV | 21     | 3-20           | 1              | QQYGSSPWT   | 9      | -          | -     | -        |
| mT2D01 28   | 4-55  | 6-19 | 3  | 4  | EGERGAGTTFDY          | 12     | 1-33           | 2              | QQYDNLPMYT  | 10     | -          | -     | -        |
| mT2D01 34   | 1-3   | 3-10 | 1  | 4  | GGLLWFGEALTYFDY       | 15     | 1-39           | 2              | QQSYSTPDT   | 9      | -          | +     | -        |
| mT2D01 40κ# | 1-69  | 3-10 | 2  | 4  | VMGSGSDY              | 9      | 2-28           | 3              | MQALQTP     | 7      | -          | -     | -        |
| mT2D01 50#  | 1-69  | 3-10 | 2  | 4  | VYSGSYIY              | 9      | 1-5            | 1              | QQYNSYWA    | 8      | -          | -     | -        |
| mT2D01 51   | 1-2   | 4-23 | 2  | 3  | LRGGNSGRRAFDI         | 13     | 3-20           | 2              | QQYGSSPYT   | 9      | +          | -     | N        |
| mT2D01 54   | 4-39  | 4-17 | 2  | 4  | EGDGDYLVFDY           | 11     | 3-11           | 4              | QQRSNWL     | 8      | -          | -     | -        |
| mT2D01 58#  | 1-69  | /    | /  | 4  | AHVS                  | 4      | 1-33           | 1              | QQYDNLPPA   | 9      | -          | -     | -        |
| mT2D01 61   | 3-30  | /    | /  | 5  | GELYPPWWFDP           | 11     | 1-16           | 4              | QQYNSYPLT   | 9      | -          | +     | -        |
| mT2D01 65   | 3-23  | /    | /  | 1  | QNQH                  | 4      | 1-5            | 1              | QQYNSYSWT   | 9      | -          | -     | c        |
| mT2D01 71   | 3-9   | 6-19 | 3  | 4  | DIKGIAYYFDY           | 12     | 1-17           | 4              | LQHNSYPPA   | 9      | -          | -     | -        |
| mT2D01 72   | 3-48  | 3-22 | 2  | 4  | DRAGKTYYYDSSGLSN      | 16     | 1-39           | 2              | QQSYSTPPYT  | 10     | -          | +     | -        |
| mT2D01 75   | 1-24  | 6-13 | 2  | 5  | WSSSGDWFDP            | 10     | 1D-16          | 2              | QQYNSYPYT   | 9      | -          | -     | -        |
| mT2D01 76   | 1-8   | 1-26 | 2  | 3  | GVRGSYYDAFDI          | 12     | 1-39           | 2              | QQSYSTLYT   | 9      | -          | -     | -        |
| mT2D01 85   | 4-b   | 4-23 | 2  | 4  | GDYGFFDY              | 8      | 1-8            | 1              | QQYYSYPWT   | 9      | -          | -     | -        |
| mT2D01 90   | 4-39  | 6-19 | 2  | 4  | HPRFEYSSGWYAYYFDY     | 17     | 3-20           | 4              | QQYGSSPT    | 8      | -          | -     | -        |
| mT2D01 91   | 4-34  | 1-26 | 3  | 4  | RRIVGATPD             | 9      | 3-15           | 3              | QQYNNWPPA   | 9      | -          | -     | -        |
| mT2D01 30   |       |      |    |    |                       |        | 1-16           | 1              | QQYNSYPSWT  | 10     | -          | -     | -        |
|             | VH    | D    | RF | JH | CDR3 (aa)             | Length | V <sub>λ</sub> | J <sub>λ</sub> | CDR3 (aa)   | Length | Poly       | HEp-2 | Staining |
| mT2D01 08   | 4-39  | 6-13 | 2  | 4  | HSFGSSWYVQGDY         | 13     | 2-14           | 2              | SSYTSSTLVV  | 11     | -          | -     | -        |
| mT2D01 13#  | 4-61  | 6-19 | 3  | 6  | APGIGYYYYYGMVDV       | 14     | 3-1            | 2              | QAWDSSTRVV  | 10     | -          | -     | -        |
| mT2D01 22   | 3-30  | 5-5  | 2  | 4  | VERDARYSYGPEY         | 14     | 2-18           | 3              | SSYTSSTWV   | 10     | -          | -     | -        |
| mT2D01 31#  | 5-51  | /    | /  | 4  | LGFD                  | 4      | 1-44           | 3              | AAWDDSLNGWV | 11     | -          | -     | -        |
| mT2D01 33   | 1-46  | 1-26 | 3  | 4  | VGATVPDY              | 8      | 2-14           | 1              | SSYTSSTLAYV | 12     | -          | -     | -        |
| mT2D01 37   | 3-48  | 4-17 | 3  | 6  | EQVTTMYYYGMDV         | 13     | 6-57           | 3              | QSYDSSNHVV  | 10     | -          | -     | -        |
| mT2D01 38   | 4-b   | 6-19 | 2  | 4  | QPPASGWSVFDY          | 12     | 2-14           | 2              | SSYTSSTLV   | 10     | -          | -     | c        |
| mT2D01 39   | 4-4   | 5-12 | 2  | 6  | SRTGGYDRNYYYYYGMVDV   | 18     | 1-40           | 2              | QSYDSSLSDVV | 11     | -          | -     | -        |
| mT2D01 40λ# |       |      |    |    | see kappa             |        | 4-60           | 3              | ETWDSNTWV   | 9      | -          | -     | -        |
| mT2D01 68   | 4-61  | 3-22 | 2  | 4  | AVVNYDSSGTLDY         | 14     | 3-25           | 2              | QSADSSGTYYV | 11     | -          | -     | -        |
| mT2D01 69   | 3-66  | 4-23 | 3  | 4  | VTTVRLYYQISN          | 12     | (I)-70         | 3              | STWDYSLSAWV | 11     | +          | +     | c        |
| mT2D01 78   | 4-61  | 5-5  | 3  | 4  | VARTYDTAIPWGGGGNFDY   | 19     | 2-23           | 2              | CSYAGSVV    | 8      | -          | +     | c+N      |
| mT2D01 94   | 3-33  | 3-10 | 1  | 4  | SEAGWFGDLSGY          | 12     | 1-44           | 3              | AAWDDSLNGWV | 11     | -          | -     | -        |
| mT2D01 27   |       |      |    |    |                       |        | 1-40           | 3              | QSYDSSLGGSV | 11     | -          | -     | -        |
|             | VH    | D    | RF | JH | CDR3 (aa)             | Length |                |                |             |        |            |       |          |
| mT2D01 14   | 4-39  | /    | /  | 5  | ILGSRPIEDWFDP         | 13     |                |                |             |        |            |       |          |
| mT2D01 96   | 3-33  | 3-3  | 3  | 4  | DRSIFGVVTTYFDY        | 14     |                |                |             |        |            |       |          |

RF, reading frame; #, antibody failed to be expressed

-, non-reactive; +, reactive; +2, highly reactive

c, diffuse cytoplasmic staining; A, actin staining; G, Golgi staining; M, mitochondria staining; MS, mitotic spindle staining; N, nuclear staining; F, cytoplasmic fibers

**Supplemental Table 38** Repertoire and reactivity of antibodies from mature naive B cells of type 2 diabetes patient 2

| Ig         | HEAVY |      |    |    |                       | LIGHT  |                |                |               |        | REACTIVITY |       |          |
|------------|-------|------|----|----|-----------------------|--------|----------------|----------------|---------------|--------|------------|-------|----------|
|            | VH    | D    | RF | JH | CDR3 (aa)             | Length | V <sub>k</sub> | J <sub>k</sub> | CDR3 (aa)     | Length | Poly       | HEp-2 | Staining |
| mT2D02 01  | 3-21  | /    | /  | 4  | DVNGDRTFAPQQN         | 13     | 3-15           | 1              | QQYNNWPPWT    | 10     | -          | -     | -        |
| mT2D02 02  | 1-18  | 4-23 | 1  | 5  | DPLLRYGDIVATPNWFDP    | 18     | 1-39           | 1              | QQSYSTPRRT    | 9      | -          | -     | -        |
|            |       | 5-12 | 3  |    |                       |        |                |                |               |        |            |       |          |
| mT2D02 08  | 1-46  | 7-27 | 2  | 4  | SLHGQVWGYDY           | 11     | 2-40           | 2              | MQRIEFPYT     | 9      | -          | -     | -        |
| mT2D02 15  | 3-73  | 3-3  | 3  | 3  | TLFTIFGVVIASDDDAFDI   | 19     | 1-39           | 1              | QQSYSTLTWT    | 10     | +          | +     | -        |
| mT2D02 17  | 4-34  | 3-22 | 2  | 4  | RSINHDSGGYRY          | 13     | 1-5            | 2              | QQYNSYSPYT    | 10     | -          | -     | -        |
| mT2D02 23  | 3-64  | /    | /  | 6  | EARLPGTAPTIDYMDV      | 17     | 3-11           | 3              | QQRSNWPLFT    | 10     | -          | -     | -        |
| mT2D02 25  | 1-2   | 3-9  | 2  | 4  | RRTYYDILTALEVQFYFDY   | 19     | 1-39           | 4              | QQSYSTPRALT   | 11     | -          | +     | -        |
| mT2D02 33  | 4-34  | 6-19 | 2  | 5  | AVESGGWYPYGFDFP       | 15     | 3-15           | 2              | QQYNNWPPYT    | 10     | -          | -     | -        |
| mT2D02 35  | 3-11  | 6-19 | 3  | 4  | GRGIAVAGTGAFDY        | 14     | 3-20           | 1              | QQYGSSTP      | 8      | -          | -     | -        |
| mT2D02 41  | 5-51  | 4-17 | 2  | 2  | QVEVYGDRELDLYGYFDL    | 19     | 1-27           | 4              | QKYNSAPLT     | 9      | -          | -     | -        |
| mT2D02 51  | 1-69  | 6-19 | 3  | 3  | RAVAGTSYAFDI          | 12     | 4-1            | 2              | QQYYSTPYT     | 9      | +          | +     | c        |
| mT2D02 52  | 4-59  | 6-13 | 1  | 5  | QTSEQQLVPGWFDFP       | 14     | 3-15           | 2              | QQYNNWPPYT    | 10     | -          | -     | -        |
| mT2D02 53  | 3-66  | 4-17 | 2  | 4  | GHDYGDHPPIY           | 11     | 1-5            | 1              | QQYNSYSYTWT   | 11     | -          | -     | -        |
| mT2D02 59# | 4-4   | 1-1  | 2  | 5  | VKIFWNDVFLAGWFDFP     | 16     | 4-1            | 4              | QQYYSTPLT     | 9      |            |       |          |
| mT2D02 09  |       |      |    |    |                       |        | 4-1            | 1              | QQYYSTPWT     | 9      |            |       |          |
|            | VH    | D    | RF | JH | CDR3 (aa)             | Length | V <sub>λ</sub> | J <sub>λ</sub> | CDR3 (aa)     | Length | Poly       | HEp-2 | Staining |
| mT2D02 05  | 1-2   | 3-10 | 2  | 5  | GPAPYYGSGSYPKPFGWFDFP | 20     | 1-44           | 2              | AAWDDSLNGVV   | 11     | -          | -     | -        |
| mT2D02 20  | 3-23  | 3-22 | 3  | 4  | GGIVVVITYYFDY         | 13     | 3-1            | 2              | QAWDSSTVV     | 9      | +          | -     | -        |
| mT2D02 24  | 3-48  | 3-22 | 2  | 3  | DLEAYDSSGYYPNDAFDI    | 18     | 3-1            | 1              | QAWDSSTAYV    | 11     | -          | -     | -        |
| mT2D02 29# | 4-61  | 6-13 | 3  | 3  | EAAAAFDI              | 8      | 2-11           | 2              | CSYAGSYTLV    | 10     |            |       |          |
| mT2D02 31  | 4-59  | /    | /  | 3  | GSRLHLSAFDI           | 11     | 1-44           | 2              | AAWDDSLNGHV   | 12     | -          | -     | -        |
| mT2D02 32  | 3-7   | 6-13 | 2  | 4  | DGPSSTPGD             | 9      | 2-11           | 2              | CSYAGSYVV     | 9      | -          | -     | -        |
| mT2D02 46  | 3-48  | 4-23 | 3  | 5  | VPAAGRARTTVVAP        | 13     | 1-51           | 1              | GTWDSLSLSPNYV | 12     | +2         | +     | N        |
| mT2D02 49# | 3-48  | 3-16 | 1  | 3  | EGETDAFDI             | 9      | 1-40           | 1              | QSYDSSLGSGV   | 11     |            |       |          |
| mT2D02 54  | 3-43  | /    | /  | 6  | DIGFNYGSHPHYYYYYMDV   | 19     | 1-44           | 3              | AAWDDSLNGHWV  | 12     | -          | -     | -        |
| mT2D02 55# | 3-7   | 2-2  | 1  | 3  | MVGKYQLLFRAFDI        | 14     | 1-51           | 2              | GTWDSLSL SAVV | 11     |            |       |          |
| mT2D02 58  | 3-15  | 3-10 | 3  | 5  | DLTLMVRGVMVGGRR       | 14     | 1-47           | 3              | AAWDDSLSGRV   | 11     | -          | +     | -        |
| mT2D02 26  |       |      |    |    |                       |        | 1-44           | 3              | AAWDDSLNGPV   | 11     |            |       |          |
|            | VH    | D    | RF | JH | CDR3 (aa)             | Length |                |                |               |        |            |       |          |
| mT2D02 06  | 4-59  | 2-2  | 3  | 5  | LVAENIVVPAAMPLRSWFDFP | 21     |                |                |               |        |            |       |          |
| mT2D02 34  | 3-23  | 4-17 | 2  | 4  | VEYGDALDY             | 9      |                |                |               |        |            |       |          |
| mT2D02 43  | 3-20  | /    | /  | 5  | GRDLSIPHWDFP          | 12     |                |                |               |        |            |       |          |
| mT2D02 44  | 4-61  | 5-12 | 2  | 6  | SMWGYSGYDLVDYMDV      | 19     |                |                |               |        |            |       |          |
| mT2D02 47  | 3-23  | /    | /  | 4  | DRGSLWADPFY           | 12     |                |                |               |        |            |       |          |
| mT2D02 60  | 3-33  | 6-6  | 2  | 3  | EWVYSSSGDAFDI         | 13     |                |                |               |        |            |       |          |

RF, reading frame; #, antibody failed to be expressed

-, non-reactive; +, reactive; +2, highly reactive

c, diffuse cytoplasmic staining; A, actin staining; G, Golgi staining; M, mitochondria staining; MS, mitotic spindle staining; N, nuclear staining; F, cytoplasmic fibers

**Supplemental Table 39** Repertoire and reactivity of antibodies from new emigrant B cells of rheumatoid arthritis patient 11

| Ig         | HEAVY |      |    |    |                        | LIGHT  |      |    |             |        | REACTIVITY |       |          |
|------------|-------|------|----|----|------------------------|--------|------|----|-------------|--------|------------|-------|----------|
|            | VH    | D    | RF | JH | CDR3 (aa)              | Length | Vκ   | Jκ | CDR3 (aa)   | Length | Poly       | HEp-2 | Staining |
| neRA11 01# | 1-18  | 3-3  | 3  | 4  | GITIFGVVIMDY           | 12     | 3-20 | 3  | QQYGSSPFT   | 9      |            |       |          |
| neRA11 06  | 3-23  | 6-19 | 3  | 3  | FSGWSIAAALGPTADAFDI    | 20     | 1-9  | 4  | QQLNSYPLT   | 9      | -          | +     | -        |
| neRA11 14  | 3-48  | 3-3  | 3  | 4  | GFRITIFGVVTKVYYFDY     | 18     | 1-33 | 2  | QQYDNLPLYT  | 9      | +          | +2    | -        |
| neRA11 21# | 4-34  | 6-19 | 2  | 4  | AFGSGWYRSGWYLRGYFDY    | 19     | 3-20 | 2  | QQYGSSPPYS  | 10     |            |       |          |
| neRA11 32  | 4-34  | 6-13 | 3  | 5  | RYSSWYIAAAGRTWFDP      | 17     | 1-39 | 1  | QQSYSTPPT   | 9      | +2         | +     | F        |
| neRA11 37  | 3-33  | 1-7  | 3  | 4  | APMYGTGRGGADY          | 13     | 2-30 | 1  | MQGTHWPPT   | 9      | -          | -     | -        |
| neRA11 38  | 4-61  | 5-24 | 3  | 4  | DREMATIDY              | 9      | 1-33 | 5  | QQYDNLPIIT  | 9      | -          | -     | -        |
| neRA11 42  | 3-7   | /    | /  | 3  | AFDI                   | 4      | 1-39 | 4  | QQSYSTPLT   | 9      | -          | -     | -        |
| neRA11 47  | 4-61  | /    | /  | 3  | LDTLKAFDI              | 9      | 1-5  | 4  | QQYNSYSGLT  | 10     | -          | -     | -        |
| neRA11 55  | 3-9   | /    | /  | 2  | DGGERGGSGYFDL          | 13     | 3-20 | 1  | QQYGSSPRT   | 9      | -          | +     | -        |
| neRA11 70  | 1-18  | 5-5  | 2  | 4  | EFAGGYSYGAPFDY         | 14     | 3-15 | 1  | QQYNNWPRT   | 9      | -          | +     | -        |
| neRA11 71  | 4-34  | /    | /  | 4  | GGPHYFDY               | 8      | 3-20 | 3  | QQYGSSPFT   | 9      | -          | -     | -        |
| neRA11 75# | 1-18  | 3-22 | 2  | 4  | DSSGYSTYFDY            | 12     | 3-11 | 3  | QQRSNWPT    | 8      |            |       |          |
| neRA11 79  | 3-11  | 1-26 | 2  | 4  | EWGYSGSHVDY            | 11     | 1-39 | 3  | QQSYSTPPFT  | 10     | -          | -     | -        |
| neRA11 80# | 1-2   | 2-15 | 2  | 4  | VFSVDDAPDIICSGGSCTLRDY | 23     | 1-33 | 5  | QQYDNLPFPT  | 9      |            |       |          |
| neRA11 92  | 3-30  | 1-26 | 2  | 3  | VKGGYSYDAFDI           | 12     | 1-5  | 2  | QQYNSYPYT   | 9      | -          | -     | -        |
| neRA11 95  | 3-33  | 4-4  | 2  | 4  | GFSDYSNEGGY            | 11     | 4-1  | 1  | QQYYSTPWT   | 9      | -          | -     | -        |
| neRA11 04  |       |      |    |    |                        |        | 1-27 | 3  | QKYNSAPQT   | 9      |            |       |          |
| neRA11 10  |       |      |    |    |                        |        | 3-20 | 2  | QQYGSSSKYT  | 9      |            |       |          |
| neRA11 17  |       |      |    |    |                        |        | 1-39 | 2  | QQSYSTPYS   | 9      |            |       |          |
| neRA11 22  |       |      |    |    |                        |        | 3-20 | 1  | QQYGSSPRT   | 9      |            |       |          |
| neRA11 27  |       |      |    |    |                        |        | 3-20 | 3  | QQYGSSLGFT  | 10     |            |       |          |
| neRA11 29  |       |      |    |    |                        |        | 3-15 | 5  | QQYNNWPPIT  | 10     |            |       |          |
| neRA11 30  |       |      |    |    |                        |        | 2-28 | 3  | MQALQTPFT   | 9      |            |       |          |
| neRA11 31  |       |      |    |    |                        |        | 3-20 | 2  | QQYGSSLYS   | 9      |            |       |          |
| neRA11 51  |       |      |    |    |                        |        | 4-1  | 4  | QQYYSTPPT   | 9      |            |       |          |
|            | VH    | D    | RF | JH | CDR3 (aa)              | Length | Vλ   | Jλ | CDR3 (aa)   | Length | Poly       | HEp-2 | Staining |
| neRA11 08  | 3-30  | /    | /  | 4  | GTNPKAFDY              | 9      | 1-44 | 2  | AAWDDSLNGVV | 11     | -          | -     | -        |
| neRA11 26  | 1-18  | 1-7  | 3  | 5  | DQGGRTVGTGTP           | 12     | 1-47 | 1  | AAWDDSLSGYV | 11     | +          | +     | -        |
| neRA11 90  | 1-46  | 3-9  | 2  | 4  | DPNYDIFSYYFDY          | 13     | 3-21 | 3  | QVWDSSSDHWV | 11     | +          | +     | -        |
| neRA11 18  |       |      |    |    |                        |        | 2-23 | 3  | CSYAGSSTWV  | 10     |            |       |          |
| neRA11 33  |       |      |    |    |                        |        | 1-44 | 3  | AAWDDSLNGRV | 11     |            |       |          |
| neRA11 81  |       |      |    |    |                        |        | 2-14 | 2  | SSYTSSSTYVV | 11     |            |       |          |
| neRA11 89  |       |      |    |    |                        |        | 3-25 | 2  | QSADSSGTYVV | 11     |            |       |          |
|            | VH    | D    | RF | JH | CDR3 (aa)              | Length |      |    |             |        |            |       |          |
| neRA11 23  | 5-51  | 6-13 | 2  | 4  | GGRSSWYGLGY            | 11     |      |    |             |        |            |       |          |

RF, reading frame; #, antibody failed to be expressed

-, non-reactive; +, reactive; +2, highly reactive

c, diffuse cytoplasmic staining; A, actin staining; G, Golgi staining; M, mitochondria staining; MS, mitotic spindle staining; N, nuclear staining; F, cytoplasmic fibers

**Supplemental Table 40** Repertoire and reactivity of antibodies from new emigrant B cells of rheumatoid arthritis patient 24

| Ig         | HEAVY  |      |    |    |                               |        | LIGHT |    |             |        | REACTIVITY |       |          |
|------------|--------|------|----|----|-------------------------------|--------|-------|----|-------------|--------|------------|-------|----------|
|            | VH     | D    | RF | JH | CDR3 (aa)                     | Length | Vκ    | Jκ | CDR3 (aa)   | Length | Poly       | HEp-2 | Staining |
| neRA24 01# | 4-31   | 3-10 | 3  | 4  | VGAPMNDLHFVTMVRGPGYFDY        | 23     | 3-20  | 1  | QQYGSSPWT   | 9      |            |       |          |
| neRA24 02# | 4-34   | 2-2  | 3  | 4  | AVSVVVVPAATSXYGLTNHVVIARGPFDY | 28     | 4-1   | 1  | QQYYSTPPWT  | 10     |            |       |          |
| neRA24 09  | 3-9    | 1-26 | 3  | 3  | DIRLSGVGALGGAFDI              | 16     | 3-20  | 3  | QQYGSSPLT   | 9      | -          | -     | -        |
| neRA24 11  | 1-8    | 2-15 | 2  | 5  | GPTMYCSGGCYSFDP               | 15     | 1-39  | 2  | QQSYSTLYT   | 9      | -          | -     | c+N      |
| neRA24 14  | 1-18   | 2-15 | 2  | 4  | VSCSGSCYPGY                   | 12     | 1-5   | 1  | QQYNSYWT    | 8      | +          | +     | -        |
| neRA24 15  | 4-34   | 6-13 | 3  | 4  | AITPHRIAAAGPFDY               | 15     | 1-27  | 1  | KQYNSAPRT   | 9      | -          | +     | N        |
| neRA24 18  | 4-59   | 3-22 | 2  | 4  | VPVYDSSGYEDY                  | 12     | 2-30  | 1  | MQGTHWLWT   | 9      | -          | -     | -        |
| neRA24 21  | 4-34   | 3-16 | 2  | 4  | GYGGYVWGGPNGDY                | 14     | 3-15  | 3  | QQYNNWPRA   | 9      | +          | +     | -        |
| neRA24 22  | 3-15   | 3-10 | 3  | 4  | DHRITMVRGAD                   | 11     | 2-28  | 2  | MQALQTPYT   | 9      | -          | -     | -        |
| neRA24 23# | 1-69   | 3-9  | 2  | 6  | RAALYDILTGAIIYYYGMDV          | 21     | 2-28  | 1  | MQALQTRT    | 8      |            |       |          |
| neRA24 28  | 1-69   | 6-13 | 3  | 1  | GGGAAAGTAYFQH                 | 13     | 3-20  | 1  | QQYGSSPT    | 8      | +          | +     | -        |
| neRA24 33  | 4-59   | 5-5  | 2  | 2  | FRGSYGTWEYFDL                 | 13     | 1D-12 | 4  | QQANSFPLT   | 9      | -          | -     | -        |
| neRA24 36# | 4-34   | 2-2  | 3  | 3  | LVVVVPAAPDDAFDI               | 14     | 3-20  | 1  | QQYGSSPRT   | 9      |            |       |          |
| neRA24 38  | 4-39   | 2-21 | 3  | 1  | VLVTATHAEYFQH                 | 13     | 1-39  | 2  | QQSYSTPYT   | 9      | -          | -     | -        |
| neRA24 39# | 1-24   | 3-9  | 2  | 3  | AILTGLDAFDI                   | 11     | 2-30  | 5  | MQGTHWPPIT  | 10     |            |       |          |
| neRA24 40  | 3-43   | /    | /  | 6  | DITYSHTYYYMDV                 | 13     | 3-15  | 4  | QQYNNWPPLT  | 10     | -          | -     | -        |
| neRA24 42# | 1-18   | 2-2  | 2  | 4  | ERYCSSTSCYPSGY                | 14     | 3-20  | 1  | QQYGSSPRT   | 9      |            |       |          |
| neRA24 43κ | 4-39   | 5-24 | 1  | 4  | DLQSRGPFDY                    | 10     | 1-8   | 1  | QQYYSYPRT   | 9      | -          | -     | -        |
| neRA24 47  | 4-31   | 3-10 | 3  | 6  | DSGVIEEGYMDV                  | 13     | 4-1   | 2  | QQYYSTPYT   | 9      | -          | -     | -        |
| neRA24 48  | 3-9    | 2-21 | 3  | 6  | DSSVVTGLMDV                   | 11     | 2-29  | 2  | MQGIHLRT    | 8      | -          | -     | -        |
| neRA24 03  |        |      |    |    |                               |        | 3-15  | 1  | QQYNNWPPWT  | 10     |            |       |          |
| neRA24 04  |        |      |    |    |                               |        | 1-9   | 4  | QQLNSYPPT   | 9      |            |       |          |
| neRA24 07  |        |      |    |    |                               |        | 1-5   | 1  | QQYNSYWT    | 8      |            |       |          |
| neRA24 13  |        |      |    |    |                               |        | 3-15  | 1  | QQYNNWPRT   | 9      |            |       |          |
| neRA24 17  |        |      |    |    |                               |        | 1-33  | 3  | QQYDNLFLFT  | 10     |            |       |          |
| neRA24 20  |        |      |    |    |                               |        | 1-39  | 2  | QQSYSTPYT   | 9      |            |       |          |
| neRA24 26  |        |      |    |    |                               |        | 2-30  | 2  | MQGTHWPTYT  | 9      |            |       |          |
| neRA24 29  |        |      |    |    |                               |        | 1-39  | 2  | QQSYSTPDT   | 9      |            |       |          |
| neRA24 34  |        |      |    |    |                               |        | 3-15  | 1  | QQYNNWPRT   | 9      |            |       |          |
|            | VH     | D    | RF | JH | CDR3 (aa)                     | Length | Vλ    | Jλ | CDR3 (aa)   | Length | Poly       | HEp-2 | Staining |
| neRA24 06  | 4-39   | 6-13 | 3  | 6  | HAGNVHYYYYYYMDV               | 15     | 2-8   | 3  | SSYAGSNNLV  | 10     | -          | -     | -        |
| neRA24 16  | 3-48   | 3-10 | 3  | 6  | DLMVRGVIAYYYYGMDV             | 17     | 1-44  | 3  | AAWDDSLNGWV | 11     | +          | -     | -        |
| neRA24 19  | 3-33   | 5-12 | 3  | 4  | SLVATTPCGY                    | 10     | 7-46  | 1  | LLSYSGALYV  | 10     | +          | +     | c        |
| neRA24 24# | 1-18   | 6-13 | 1  | 4  | EAEQQLDPFDY                   | 11     | 3-21  | 2  | QVWDSSSDLEV | 11     |            |       |          |
| neRA24 41# | 4-34   | 3-10 | 2  | 6  | GNYGSGRHSACYMDV               | 16     | 2-14  | 2  | SSYTSSSTRV  | 10     |            |       |          |
| neRA24 43λ |        |      |    |    | see kappa                     |        | 2-14  | 3  | SSYTSSSTLV  | 10     | -          | -     | -        |
| neRA24 44  | 3-30-3 | 3-10 | 2  | 6  | DRYYYYGSGRGYYYGMDV            | 18     | 3-21  | 2  | QVWDSSSDHVV | 11     | -          | -     | -        |
| neRA24 45# | 4-59   | 3-10 | 3  | 5  | DMVRGVIHP                     | 9      | 2-14  | 2  | SSYTSSSTLVV | 10     |            |       |          |
| neRA24 10  |        |      |    |    |                               |        | 1-51  | 2  | GTWDSSLSAVV | 11     |            |       |          |

RF, reading frame; #, antibody failed to be expressed

-, non-reactive; +, reactive; +2, highly reactive

c, diffuse cytoplasmic staining; A, actin staining; G, Golgi staining; M, mitochondria staining; MS, mitotic spindle staining; N, nuclear staining; F, cytoplasmic fibers

**Supplemental Table 41** Repertoire and reactivity of antibodies from new emigrant B cells of rheumatoid arthritis patient 30

| Ig           | HEAVY |             |        |    |                            |        | LIGHT |    |              |        | REACTIVITY |       |          |
|--------------|-------|-------------|--------|----|----------------------------|--------|-------|----|--------------|--------|------------|-------|----------|
|              | VH    | D           | RF     | JH | CDR3 (aa)                  | Length | Vκ    | Jκ | CDR3 (aa)    | Length | Poly       | HEp-2 | Staining |
| neRA30 101   | 1-58  | 6-13        | 3      | 6  | DQWAAAGYYYGMDV             | 14     | 3-20  | 4  | QQYGSSPLT    | 8      | -          | -     | -        |
| neRA30 102   | 3-49  | 1-26        | 3      | 4  | ANPLGVGAVDY                | 11     | 2-40  | 4  | MQRIEFPLT    | 9      | -          | -     | -        |
| neRA30 104   | 3-66  | 5-5         | 2      | 4  | VGGYSYDHFY                 | 11     | 3-11  | 3  | QQRSNWPKFT   | 10     | -          | -     | -        |
| neRA30 105   | 4-59  | /           | /      | 5  | GGVLTTEGNWFDP              | 13     | 1-8   | 3  | QQYYSYPFT    | 9      | +          | +     | -        |
| neRA30 110   | 4-59  | 1-26        | 3      | 5  | AIVGRNESSWFDP              | 13     | 3-20  | 3  | QQYGSSPLFT   | 10     | -          | -     | -        |
| neRA30 112   | 3-21  | 2-15        | 2      | 3  | DRSPRYCSGGSCYPEAFDI        | 19     | 3-20  | 4  | QQYGSSLT     | 8      | -          | -     | -        |
| neRA30 115   | 4-59  | 4-4         | 3      | 4  | TTPGRVDY                   | 8      | 3-20  | 4  | QQYGSSSLT    | 9      | -          | -     | -        |
| neRA30 118#  | 4-59  | 3-10        | 2      | 6  | DGSGTYYSFKDYHHYMDV         | 18     | 3-20  | 1  | QQYGSSPWT    | 9      |            |       |          |
| neRA30 120   | 3-30  | 2-15        | 3      | 4  | DLPVVVVAATQGGPLDY          | 17     | 3-20  | 4  | QQYGSSPLT    | 9      | +          | +     | -        |
| neRA30 122#  | 3-64  | 2-8         | 2      | 4  | GYCTGGVCYTPGDAGDYFDY       | 20     | 1-5   | 1  | QQYNSYPWT    | 9      |            |       |          |
| neRA30 123κ# | 3-23  | 3-10        | 2      | 4  | DXYYYGSGSYIYRFDY           | 16     | 3-20  | 1  | QQYGSSPT     | 8      |            |       |          |
| neRA30 126   | 4-31  | 2-15        | 2      | 4  | AIGGGGSCYVDY               | 12     | 1-39  | 1  | QQSYSTPWT    | 9      | +2         | +     | -        |
| neRA30 127κ# | 3-15  | 6-6         | 3      | 4  | DLGPQIAARGY                | 11     | 3-20  | 1  | QQYGSSPT     | 8      |            |       |          |
| neRA30 131   | 3-30  | 2-8<br>6-13 | 2<br>3 | 2  | DGAVLGYCTGGVCYRIAAGTGGYFDL | 27     | 1-5   | 1  | QQYNSYSRWA   | 10     | +          | +     | -        |
| neRA30 133   | 4-34  | 6-6         | 2      | 4  | GPKASSSLAY                 | 10     | 1-33  | 2  | QQYDNLPPPT   | 10     | -          | -     | -        |
| neRA30 134#  | 3-30  | 5-12        | 2      | 6  | DHSGYDQALARTYYYYYGMVDV     | 21     | 1-8   | 5  | QQYYSYPLT    | 9      |            |       |          |
| neRA30 141#  | 3-7   | 6-13        | 2      | 6  | DGFRPSSSWDNYYYYYMDV        | 19     | 1-39  | 3  | QQSYSTPFT    | 9      |            |       |          |
| neRA30 143#  | 3-23  | 6-13        | 3      | 4  | DTPSAGALIEYNFDY            | 15     | 2-20  | 1  | MQGTHWPPT    | 9      |            |       |          |
| neRA30 114   |       |             |        |    |                            |        | 3-20  | 3  | QQYGSSSLFT   | 9      |            |       |          |
| neRA30 137   |       |             |        |    |                            |        | 3-20  | 1  | QQYGSSPRT    | 9      |            |       |          |
| neRA30 138   |       |             |        |    |                            |        | 2-28  | 1  | MQALQTPRT    | 9      |            |       |          |
| neRA30 145   |       |             |        |    |                            |        | 1-39  | 1  | QQSYSTTPT    | 9      |            |       |          |
| neRA30 146   |       |             |        |    |                            |        | 3-11  | 2  | QQRSNWPPRYT  | 11     |            |       |          |
| neRA30 148   |       |             |        |    |                            |        | 1-5   | 1  | QQYNSYPWT    | 9      |            |       |          |
|              | VH    | D           | RF     | JH | CDR3 (aa)                  | Length | Vλ    | Jλ | CDR3 (aa)    | Length | Poly       | HEp-2 | Staining |
| neRA30 103   | 5-a   | 3-10        | 2      | 5  | HPSVYSGTSGWFDP             | 15     | 3-21  | 3  | QVWDSSSDHQV  | 11     | -          | -     | -        |
| neRA30 107#  | 4-34  | 3-10        | 1      | 4  | GGPHRLTNSQSILWFGELFHDY     | 23     | 3-21  | 2  | QVWDSSSDHVV  | 11     |            |       |          |
| neRA30 109   | 3-30  | 3-10        | 2      | 6  | DTGESIYYYYYMDV             | 14     | 3-14  | 2  | SSYTSSTDVV   | 11     | -          | -     | -        |
| neRA30 117#  | 3-66  | /           | /      | 5  | DIGGVTGWFPD                | 11     | 3-1   | 2  | QAWDSSTVV    | 9      |            |       |          |
| neRA30 121#  | 1-69  | 4-17        | 2      | 2  | VGGGLNDYGDYETPLSWYFDL      | 22     | 2-14  | 2  | SSYTSSTLV    | 10     |            |       |          |
| neRA30 123λ# | 3-23  | 3-10        | 2      | 4  | see kappa                  | 16     | 1-40  | 7  | QSYDSSLGSSAV | 13     |            |       |          |
| neRA30 124   | 3-30  | 3-10        | 2      | 6  | YYYGSGSYGEWYMDV            | 15     | 2-11  | 1  | CSYAGSYTLGV  | 11     | -          | -     | -        |
| neRA30 125   | 3-30  | 6-13        | 2      | 4  | DQSSSWYSFSLGY              | 13     | 1-44  | 2  | AAWDDSLNGVV  | 11     | -          | -     | -        |
| neRA30 127λ  | 3-15  | 6-6         | 3      | 4  | see kappa                  | 11     | 3-10  | 3  | YSTDSSGNHRGV | 12     | +          | +     | c        |
| neRA30 130   | 3-43  | 2-2         | 3      | 6  | EGVNVVPAHYYYYYYMDV         | 18     | 2-14  | 2  | SSYTSSTYVV   | 11     | -          | -     | -        |
| neRA30 135   | 3-30  | 2-15        | 2      | 4  | DVVEYCSGGSCSYFDY           | 16     | 1-44  | 3  | AAWDDSLMGPV  | 11     | -          | -     | -        |
| neRA30 139   | 5-51  | 6-13        | 2      | 5  | CCGEGPRFSSGWDNWFDP         | 18     | 3-1   | 2  | QAWDSSTVV    | 9      | +          | +2    | -        |
| neRA30 140#  | 1-3   | /           | /      | 4  | GANYFDY                    | 7      | 2-14  | 1  | SSYTSSTRV    | 10     |            |       |          |
| neRA30 106   |       |             |        |    |                            |        | 2-14  | 7  | SSYTSSTPHAV  | 12     |            |       |          |
|              | VH    | D           | RF     | JH | CDR3 (aa)                  | Length |       |    |              |        |            |       |          |
| neRA30 117   | 3-66  | /           | /      | 5  | DIGGVTGWFPD                | 11     |       |    |              |        |            |       |          |

RF, reading frame; #, antibody failed to be expressed

-, non-reactive; +, reactive; +2, highly reactive

c, diffuse cytoplasmic staining; A, actin staining; G, Golgi staining; M, mitochondria staining; MS, mitotic spindle staining; N, nuclear staining; F, cytoplasmic fibers

Supplemental Table 42 Repertoire and reactivity of antibodies from new emigrant B cells of rheumatoid arthritis patient 33

| Ig          | HEAVY |      |    |    |        | CDR3 (aa)             | LIGHT          |                |        | CDR3 (aa)      | REACTIVITY |             |          |     |   |   |
|-------------|-------|------|----|----|--------|-----------------------|----------------|----------------|--------|----------------|------------|-------------|----------|-----|---|---|
|             | VH    | D    | RF | JH | Length |                       | V <sub>L</sub> | J <sub>L</sub> | Length |                | Poly       | HEp-2       | Staining |     |   |   |
| neRA33 02   | 4-61  | 5-5  | 3  | 6  |        | GVTYVDTAMVLYYYYGMDV   | 20             | 3-20           | 4      | QQYGSSPALT     | 10         | +           | +2       | -   |   |   |
| neRA33 03   | 3-23  | 2-21 | 2  | 6  |        | AGCGGDCYSGPYYYGMDV    | 17             | 3-15           | 2      | QQYNNWPLMYT    | 11         | -           | -        | -   |   |   |
| neRA33 04   | 4-39  | 2-15 | 2  | 4  |        | LLYCSGGSCYLFYD        | 14             | 2-28           | 5      | MQALQTPIT      | 9          | -           | -        | -   |   |   |
| neRA33 05   | 1-3   | 4-17 | 2  | 5  |        | HGYGDYRHNWFD          | 13             | 1-39           | 5      | QQSYSTPT       | 8          | -           | +        | -   |   |   |
| neRA33 07#  | 3-33  | 6-19 | 2  | 4  |        | VRGTLRGWYFYFDY        | 14             | 1D-8           | 1      | QQYSFPTWT      | 11         | -           | -        | -   |   |   |
| neRA33 12   | 3-30  | 3-10 | 1  | 5  |        | DPKSGFGELLPWFD        | 16             | 1-5            | 1      | QQYNSYSRT      | 9          | +           | +2       | -   |   |   |
| neRA33 17   | 1-18  | /    | /  | 4  |        | EGAVPDY               | 7              | 3-20           | 2      | QQYSSPKT       | 9          | -           | -        | -   |   |   |
| neRA33 18   | 4-39  | 4-17 | 2  | 4  |        | ETANYGDL              | 9              | 1-18           | 1      | QQYYSWPWT      | 9          | -           | +        | -   |   |   |
| neRA33 22   | 3-49  | 3-22 | 2  | 4  |        | DRLYDSSGYNDY          | 13             | 3-15           | 4      | QQYNNWRGT      | 9          | -           | -        | -   |   |   |
| neRA33 26#  | 1-69  | 6-19 | 3  | 4  |        | LAGTVAGSN             | 9              | 1-16           | 1      | QQYNSYPQT      | 9          | -           | -        | -   |   |   |
| neRA33 29   | 4-61  | 6-13 | 2  | 6  |        | GWNSSWCKGKCYYYGMDV    | 20             | 2-28           | 4      | MQALQTLPT      | 9          | -           | -        | -   |   |   |
| neRA33 32   | 1-58  | 3-10 | 2  | 6  |        | DQVYTYGSGTYGMDV       | 17             | 1-33           | 4      | QQYDNLRLT      | 9          | -           | +        | -   |   |   |
| neRA33 33   | 3-23  | 2-2  | 3  | 6  |        | LVPAAMRGYYGMDV        | 16             | 1-39           | 1      | QQSYSTPWT      | 9          | +           | -        | -   |   |   |
| neRA33 34   | 1-24  | /    | /  | 5  |        | ARGSRGGWFD            | 12             | 1-39           | 1      | QQSYSTLWT      | 9          | -           | -        | -   |   |   |
| neRA33 35x  | 4-39  | 4-17 | 2  | 4  |        | LSSPDYGDYEGVFDY       | 15             | 1-33           | 1      | QQYDNLPT       | 8          | -           | -        | -   |   |   |
| neRA33 36   | 4-39  | 2-2  | 3  | 6  |        | VVPAIYYYGMDV          | 14             | 1-39           | 2      | QQSYSTLGT      | 9          | +           | +2       | M   |   |   |
| neRA33 38   | 3-23  | 1-26 | 3  | 5  |        | ALGAMSP               | 7              | 3-20           | 1      | QQYSSPT        | 8          | +           | +        | M   |   |   |
| neRA33 39   | 4-34  | 6-13 | 3  | 4  |        | GRIAAGKNGIDY          | 13             | 3-15           | 1      | QQYNNWPT       | 8          | -           | -        | -   |   |   |
| neRA33 102  | 4-31  | 3-3  | 2  | 4  |        | RNPAGFWRLDY           | 11             | 1-9            | 3      | QQLSYSYSGT     | 9          | +           | +        | c   |   |   |
| neRA33 103# | 3-23  | 2-15 | 3  | 3  |        | DHFWDIVVVAHPVDAFDI    | 19             | 1-12           | 5      | QQANSFPIT      | 9          | -           | -        | -   |   |   |
| neRA33 104  | 4-39  | /    | /  | 2  |        | HPPDRRHHVYFDL         | 14             | 3-20           | 2      | QQYSSPYT       | 9          | -           | +        | -   |   |   |
| neRA33 105# | 4-39  | 1-26 | 1  | 4  |        | RHPWWELDY             | 9              | 1-33           | 3      | QQYDNLPLFT     | 9          | -           | -        | -   |   |   |
| neRA33 107  | 3-53  | /    | /  | 3  |        | DQNDAFDI              | 8              | 1-33           | 3      | QQYDNLNPLSPLFT | 15         | -           | -        | -   |   |   |
| neRA33 110  | 3-23  | /    | /  | 3  |        | NTQWSVAIDAFDI         | 13             | 3-20           | 4      | QQYSSPQNT      | 10         | -           | -        | -   |   |   |
| neRA33 112  | 4-39  | 3-10 | 2  | 6  |        | FLYSGSYEGPYYGMDV      | 21             | 3-11           | 4      | QQRSNWPLT      | 9          | +           | +        | -   |   |   |
| neRA33 115x | 3-7   | /    | /  | 5  |        | VPTANWFD              | 10             | 3-15           | 4      | QQYNNWLT       | 8          | -           | -        | -   |   |   |
| neRA33 116  | 4-4   | 6-19 | 2  | 4  |        | DRSSSL                | 6              | 1-5            | 2      | QQYNSYSRT      | 9          | +           | +        | -   |   |   |
| neRA33 118  | 4-61  | 3-22 | 2  | 4  |        | SPGGRYDSSGYIDY        | 15             | 4-1            | 1      | QQYYSTPQT      | 9          | -           | -        | N+c |   |   |
| neRA33 119  | 3-7   | 2-2  | 2  | 6  |        | SGAAYCSSTSCYLDGMDV    | 18             | 2-28           | 4      | MQALQTLPT      | 9          | -           | -        | -   |   |   |
| neRA33 120  | 3-74  | 2-2  | 3  | 3  |        | GSIVVPAAIRAFDI        | 15             | 1-39           | 2      | QQSYSTPRT      | 9          | +           | +        | F   |   |   |
| neRA33 122  | 4-39  | 6-6  | 2  | 3  |        | QPYSTRKDLQNAFDI       | 16             | 1-12           | 2      | QQANSFPYT      | 9          | -           | -        | -   |   |   |
| neRA33 124  | 1-69  | 6-13 | 2  | 6  |        | DKFSSSWHGGENRYYYGMDV  | 21             | 1-5            | 1      | QQYNSYPWT      | 9          | +           | +        | -   |   |   |
| neRA33 126x | 1-18  | 6-19 | 2  | 3  |        | VDSGWYEAALVLTSKNAFDI  | 20             | 1-5            | 1      | QQYNSYPWT      | 9          | +           | +        | -   |   |   |
| neRA33 127  | 4-59  | /    | /  | 6  |        | DSSFRQVSTAGAVRYYYGMDV | 23             | 1-39           | 1      | QQSYSTPRT      | 9          | +           | +        | c   |   |   |
| neRA33 129  | 1-69  | 3-22 | 2  | 5  |        | AQRDYDSSGYRHWFD       | 16             | 3-20           | 2      | QQYSSPYT       | 9          | +           | +        | -   |   |   |
| neRA33 132  | 3-15  | 6-13 | 2  | 4  |        | ASSYSSWYGAWALTY       | 17             | 1-5            | 4      | QQYNSYSQVT     | 10         | +           | +        | -   |   |   |
| neRA33 133  | 3-64  | 3-10 | 1  | 5  |        | DFGVSPDP              | 8              | 1-5            | 1      | QQYNSYTW       | 9          | -           | -        | -   |   |   |
| neRA33 01   |       |      |    |    |        |                       |                |                |        | 1-39           | 2          | QQSYSTLPYT  | 10       | -   | - | - |
| neRA33 16   |       |      |    |    |        |                       |                |                |        | 2-28           | 1          | MQALQTPPT   | 9        | -   | - | - |
| neRA33 19   |       |      |    |    |        |                       |                |                |        | 1-17           | 1          | LQHNSYPRT   | 9        | -   | - | - |
| neRA33 20   |       |      |    |    |        |                       |                |                |        | 2-30           | 2          | MQGTHWYT    | 8        | -   | - | - |
| neRA33 24   |       |      |    |    |        |                       |                |                |        | 1-17           | 1          | LQHNSYPPT   | 9        | -   | - | - |
| neRA33 31   |       |      |    |    |        |                       |                |                |        | 1-39           | 2          | QQSYSTPPYT  | 10       | -   | - | - |
| neRA33 37   |       |      |    |    |        |                       |                |                |        | 4-1            | 2          | QQYYSTPYT   | 9        | -   | - | - |
| neRA33 41   |       |      |    |    |        |                       |                |                |        | 3-20           | 4          | QQYSSPRLT   | 10       | -   | - | - |
| neRA33 42   |       |      |    |    |        |                       |                |                |        | 4-1            | 4          | QQYYSTPS    | 8        | -   | - | - |
| neRA33 43   |       |      |    |    |        |                       |                |                |        | 3-20           | 5          | QQYSSRIT    | 9        | -   | - | - |
| neRA33 44   |       |      |    |    |        |                       |                |                |        | 1-5            | 1          | QQYNSRWT    | 8        | -   | - | - |
| neRA33 45   |       |      |    |    |        |                       |                |                |        | 3-11           | 1          | QQRSNWPPWT  | 10       | -   | - | - |
| neRA33 48   |       |      |    |    |        |                       |                |                |        | 3-20           | 1          | QQYSSSRKT   | 9        | -   | - | - |
| neRA33 123  |       |      |    |    |        |                       |                |                |        | 3-15           | 1          | QQYNNWPPWT  | 10       | -   | - | - |
| neRA33 135  |       |      |    |    |        |                       |                |                |        | 4-1            | 3          | QQYYSTPFT   | 9        | -   | - | - |
| neRA33 136  |       |      |    |    |        |                       |                |                |        | 3-20           | 3          | QQYSSSLFT   | 9        | -   | - | - |
| neRA33 144  |       |      |    |    |        |                       |                |                |        | 1-5            | 4          | QQYNSYPLT   | 9        | -   | - | - |
| neRA33 145  |       |      |    |    |        |                       |                |                |        | 2-28           | 3          | MQALQTPGFT  | 10       | -   | - | - |
| neRA33 146  |       |      |    |    |        |                       |                |                |        | 1-27           | 5          | QKYNAPFT    | 9        | -   | - | - |
| neRA33 147  |       |      |    |    |        |                       |                |                |        | 3-20           | 1          | QQYSSPRT    | 9        | -   | - | - |
| neRA33 148  |       |      |    |    |        |                       |                |                |        | 3-20           | 1          | QQYSSRT     | 8        | -   | - | - |
| neRA33 06#  | 1-69  | 2-15 | 2  | 6  |        | DKGLGYSGSGCYYYYYGMDV  | 23             | 7-43           | 3      | LLYGGGAQLV     | 10         | -           | -        | -   |   |   |
| neRA33 09   | 4-59  | 3-16 | 3  | 4  |        | SPDYMITFGVIATDYFDY    | 19             | 1-40           | 2      | QSYDSSLGWW     | 11         | +           | +        | -   |   |   |
| neRA33 10   | 3-53  | 3-16 | 2  | 6  |        | DTPYDYVWGSYRYYYGMDV   | 20             | 2-14           | 2      | SSYSSSTRV      | 10         | +           | +        | N   |   |   |
| neRA33 13#  | 1-69  | 1-26 | 3  | 4  |        | GGFVATPSFDY           | 12             | 3-1            | 2      | QAWDSTDVV      | 9          | -           | -        | -   |   |   |
| neRA33 15   | 3-72  | /    | /  | 4  |        | LRSGBP                | 7              | 7-46           | 3      | LLSYSGARPV     | 10         | +           | +        | -   |   |   |
| neRA33 23#  | 4-39  | 2-15 | 2  | 5  |        | RLGYSGGSCYSDSVFVFD    | 20             | 1-40           | 2      | QSYDSSLGWW     | 11         | -           | -        | -   |   |   |
| neRA33 25   | 3-48  | /    | /  | 4  |        | EGLQKDYFDY            | 10             | 3-25           | 2      | QSADSSGTSYVV   | 12         | -           | -        | -   |   |   |
| neRA33 27   | 3-23  | 3-22 | 3  | 6  |        | GDMIDYGM              | 12             | 3-1            | 2      | QAWDSSATA      | 9          | -           | -        | -   |   |   |
| neRA33 35i  |       |      |    |    |        | see kappa             |                |                |        | 2-14           | 2          | SSYSSSTLDVV | 12       | -   | - | - |
| neRA33 101  | 4-61  | 3-22 | 2  | 4  |        | SLYDSSGYRSGFDY        | 15             | 3-1            | 2      | QAWDSSATV      | 9          | -           | -        | -   |   |   |
| neRA33 106  | 3-23  | 3-10 | 3  | 6  |        | DSTMVRAAAYYGM         | 16             | 3-25           | 1      | QSADSSGTYV     | 10         | -           | -        | N+c |   |   |
| neRA33 108  | 4-34  | 4-17 | 2  | 6  |        | NGDYDYYGMDV           | 13             | 2-14           | 2      | SSYSSSTRV      | 11         | -           | -        | -   |   |   |
| neRA33 115x |       |      |    |    |        | see kappa             |                |                |        | 1-44           | 3          | AAWDDSLNGRV | 11       | +2  | + | - |
| neRA33 117  | 4-31  | 2-15 | 2  | 4  |        | SCSGGSCYEFDY          | 13             | 2-14           | 2      | SSYSSSTPYVV    | 12         | -           | -        | -   |   |   |
| neRA33 121  | 3-43  | 3-22 | 2  | 4  |        | EGPYDSSGYWDY          | 12             | 2-8            | 1      | SSYAGSNLYV     | 11         | -           | -        | -   |   |   |
| neRA33 126x |       |      |    |    |        | see kappa             |                |                |        | 2-11           | 3          | CSYAGSYTWV  | 10       | +   | + | - |
| neRA33 130  | 3-23  | 3-10 | 1  | 4  |        | LSGGRWFGELSGYFDY      | 16             | 1-47           | 3      | AAWDDSLGWW     | 11         | +           | -        | -   |   |   |
| neRA33 134  | 4-31  | 2-15 | 2  | 4  |        | GRRYCSGGSCYHFDY       | 15             | 8-61           | 3      | VLYMGSISV      | 10         | +           | +        | -   |   |   |
| neRA33 30   |       |      |    |    |        |                       |                |                |        | 3-1            | 2          | QAWDSSATV   | 9        | -   | - | - |
| neRA33 14   | 3-23  | 3-16 | 3  | 4  |        | LITFGGVIVFYD          | 13             |                |        |                |            |             |          |     |   |   |
| neRA33 109  | 4-39  | 3-22 | 2  | 3  |        | HGDNYDSSGYFHAFDI      | 18             |                |        |                |            |             |          |     |   |   |

RF, reading frame; #, antibody failed to be expressed

-, non-reactive; +, reactive; +2, highly reactive

c, diffuse cytoplasmic staining; A, actin staining; G, Golgi staining; M, mitochondria staining; MS, mitotic spindle staining; N, nuclear staining; F, cytoplasmic fibers



**Supplemental Table 43** Repertoire and reactivity of antibodies from mature naive B cells of rheumatoid arthritis 11 patient

| Ig         | HEAVY  |             |        |    |                           |        | LIGHT |    |              |        | REACTIVITY |       |          |
|------------|--------|-------------|--------|----|---------------------------|--------|-------|----|--------------|--------|------------|-------|----------|
|            | VH     | D           | RF     | JH | CDR3 (aa)                 | Length | Vκ    | Jκ | CDR3 (aa)    | Length | Poly       | HEp-2 | Staining |
| mRA11 03   | 3-7    | 3-10        | 2      | 4  | SPRFDWNYGSGSYAAFDY        | 20     | 1-39  | 2  | QQSYSTRRWS   | 10     | +          | +     | -        |
| mRA11 04   | 3-49   | 3-3         | 2      | 4  | GTTYDFWGSYFDY             | 15     | 3-11  | 4  | QQRSNWPT     | 8      | -          | -     | -        |
| mRA11 11   | 4-39   | 6-6         | 3      | 4  | EGSIAARDY                 | 9      | 3-11  | 4  | QQRSNWPLT    | 9      | -          | +     | -        |
| mRA11 12   | 4-30-4 | 5-5         | 3      | 3  | DATAMVTDPEAFDI            | 14     | 3-15  | 2  | QQYNNWPPYT   | 10     | -          | -     | -        |
| mRA11 23   | 4-b    | /           | /      | 5  | GIKMGVEFDP                | 10     | 3-15  | 4  | QQYNNWPLA    | 9      | -          | +     | -        |
| mRA11 24   | 4-59   | /           | /      | 1  | NVRGVPNYFQH               | 11     | 3-20  | 3  | QQYGSSQFT    | 9      | -          | -     | -        |
| mRA11 32   | 4-4    | 3-3         | 2      | 4  | VNYDFWSGHYFDY             | 14     | 1-33  | 2  | QQYDNLRT     | 9      | -          | +     | -        |
| mRA11 33   | 4-61   | 4-23        | 3      | 4  | EGGPTVVTEVGVYD            | 15     | 3-15  | 1  | QQYNNWPPWT   | 10     | -          | -     | -        |
| mRA11 35   | 3-23   | 2-2         | 2      | 6  | PFRGRYCSSTSCYRGDYYYYYYMDV | 25     | 3-20  | 4  | QQYGSSPRVT   | 10     | +          | +2    | c        |
| mRA11 36   | 1-8    | 3-9         | 2      | 4  | DYDILTGYYYYYFDY           | 14     | 1-39  | 2  | QQSYSTPRS    | 9      | -          | -     | -        |
| mRA11 37   | 1-69   | 2-2         | 2      | 1  | NKGYCSSTSCYTHFQH          | 16     | 1-33  | 3  | QQYDNLPT     | 8      | -          | -     | c+N      |
| mRA11 40κ  | 1-18   | 3-3         | 2      | 5  | CPPNYDFWSGYGNWFDP         | 17     | 1-33  | 2  | QQYDNLAYS    | 9      | +2         | +2    | c        |
| mRA11 45   | 3-64   | 3-3         | 3      | 6  | DGRGGGTIFGVIIIGMDV        | 19     | 1-33  | 4  | QQYDNLPLT    | 10     | -          | -     | -        |
| mRA11 47   | 3-23   | 2-21        | 2      | 4  | DPLPELAYCGGDCYFFDY        | 18     | 4-1   | 4  | QQYYSTPLT    | 9      | -          | -     | -        |
| mRA11 50   | 1-18   | /           | /      | 5  | DFHTESNWFDP               | 11     | 1-39  | 3  | QQSYSTPVT    | 9      | -          | -     | -        |
| mRA11 56   | 4-34   | 6-6         | 2      | 3  | RIPYSRSFDI                | 10     | 3-20  | 2  | QQYGSSQYT    | 9      | -          | -     | -        |
| mRA11 58κ  | 1-2    | 1-26        | 2      | 3  | ENSGSNGGPLAFDI            | 14     | 1-5   | 2  | QQYNSYSNS    | 9      | -          | -     | -        |
| mRA11 08   |        |             |        |    |                           |        | 1-12  | 2  | QQANSFPYT    | 9      |            |       |          |
| mRA11 26   |        |             |        |    |                           |        | 1-27  | 1  | QKYNSAPWT    | 9      |            |       |          |
| mRA11 46   |        |             |        |    |                           |        | 1-6   | 1  | LQDYNYPRT    | 9      |            |       |          |
|            | VH     | D           | RF     | JH | CDR3 (aa)                 | Length | Vλ    | Jλ | CDR3 (aa)    | Length | Poly       | HEp-2 | Staining |
| mRA11 05#  | 4-4    | 1-26        | 2      | 2  | SMGGSYSSGWYFDL            | 14     | 1-51  | 1  | GTWDSLSAGGYV | 13     |            |       |          |
| mRA11 13   | 1-2    | 3-3         | 2      | 6  | PTTYDFWGSYREDYGGMDV       | 21     | 3-21  | 1  | QVWDSSSDHVY  | 11     | +          | +     | -        |
| mRA11 21   | 3-30-3 | 1-7         | 2      | 6  | PNHNWNYPPYYYYYMDV         | 17     | 2-14  | 1  | SSYTSSTTYV   | 10     | -          | +     | c+N      |
| mRA11 28#  | 7-4-1  | 2-2         | 3      | 4  | GTDLSLVPAANDY             | 13     | 2-8   | 2  | SSYAGSNTLVV  | 11     |            |       |          |
| mRA11 29#  | 3-30-3 | 3-22        | 3      | 4  | GGGIVVPSYFFDY             | 14     | 1-40  | 2  | QSYDSSLSGVV  | 11     |            |       |          |
| mRA11 40λ# |        |             |        |    | see kappa                 |        | 2-23  | 2  | CSYAGSSTLV   | 10     |            |       |          |
| mRA11 53   | 3-30-3 | 6-6<br>4-17 | 2<br>2 | 2  | DSRRLEYSSTPDYGDYVRANWYFDL | 25     | 2-11  | 1  | CSYAGSYTYV   | 10     | -          | +     | -        |
| mRA11 57   | 5-51   | 2-8         | 3      | 5  | SPLAAIVLMGWFPD            | 15     | 3-1   | 2  | QAWDSSTVV    | 9      | +          | +2    | -        |
| mRA11 58λ  |        |             |        |    | see kappa                 |        | 1-44  | 2  | AAWDDSLNGPVV | 12     | -          | -     | -        |
| mRA11 60   | 1-18   | /           | /      | 4  | GEGGYDY                   | 7      | 3-1   | 3  | QAWDSSTAV    | 9      | -          | +     | N        |
| mRA11 61   | 3-30   | 6-19        | 3      | 4  | FYIAVAGSDY                | 10     | 2-23  | 3  | CSYAGSSTLGV  | 11     | +          | +     | -        |
| mRA11 65   | 4-34   | 4-4         | 2      | 2  | TGYSKTWYFDL               | 11     | 6-57  | 2  | QSYDSSNPVV   | 10     | -          | +     | -        |
|            | VH     | D           | RF     | JH | CDR3 (aa)                 | Length |       |    |              |        |            |       |          |
| mRA11 14   | 3-21   | 4-4         | 1      | 3  | TLQRTPDAFDI               | 11     |       |    |              |        |            |       |          |
| mRA11 30   | 3-21   | /           | /      | 3  | GFDAFDI                   | 7      |       |    |              |        |            |       |          |
| mRA11 49   | 1-18   | /           | /      | 3  | NNYLDAFDI                 | 9      |       |    |              |        |            |       |          |
| mRA11 66   | 3-15   | 5-24        | 3      | 4  | TGMGATNDY                 | 9      |       |    |              |        |            |       |          |

RF, reading frame; #, antibody failed to be expressed

-, non-reactive; +, reactive; +2, highly reactive

c, diffuse cytoplasmic staining; A, actin staining; G, Golgi staining; M, mitochondria staining; MS, mitotic spindle staining; N, nuclear staining; F, cytoplasmic fibers

**Supplemental Table 44** Repertoire and reactivity of antibodies from mature naive B cells of rheumatoid arthritis 24 patient.

| Ig        | HEAVY  |      |    |    |                    | LIGHT  |      |    |             |        | REACTIVITY |       |          |
|-----------|--------|------|----|----|--------------------|--------|------|----|-------------|--------|------------|-------|----------|
|           | VH     | D    | RF | JH | CDR3 (aa)          | Length | Vκ   | Jκ | CDR3 (aa)   | Length | Poly       | HEp-2 | Staining |
| mRA24 04  | 1-8    | 5-5  | 2  | 4  | VLKGGGLGRGYSYAYWGY | 17     | 3-20 | 4  | QQYGSSPPLT  | 10     | +          | +     | -        |
| mRA24 19  | 3-23   | 6-13 | 2  | 4  | DLGSSWSHPGACGY     | 14     | 4-1  | 1  | QQYYSTPLT   | 9      | -          | +     | -        |
| mRA24 25  | 3-23   | /    | /  | 3  | PVVPSTGAFDI        | 10     | 3-20 | 2  | QQYGSSMPWT  | 10     | -          | -     | -        |
| mRA24 27  | 3-21   | 3-22 | 2  | 4  | VRPNYYDSSGYLDY     | 14     | 1-5  | 2  | QQYNSYSYT   | 9      | -          | -     | M        |
| mRA24 31  | 1-8    | 5-12 | 2  | 4  | AQGGYSGYMGIDY      | 13     | 1-39 | 2  | QQSYSTLRGYT | 11     | -          | -     | -        |
| mRA24 39# | 3-30   | 5-12 | 1  | 5  | EWLLESNWFDP        | 11     | 3-11 | 1  | QQRSNWPPWT  | 10     |            |       |          |
| mRA24 45  | 3-21   | /    | /  | 3  | DSVRAFDI           | 8      | 1-33 | 2  | QQYDNLPYT   | 9      | -          | -     | M        |
| mRA24 47κ | 3-11   | 3-22 | 3  | 3  | GGLIVASDAFDI       | 12     | 2-28 | 1  | MQALQLWT    | 8      | -          | -     | c        |
| mRA24 64  | 4-31   | 5-5  | 1  | 6  | SWIQLWLGEYGMVDV    | 15     | 1-39 | 2  | QQSYSTPYT   | 9      | +          | +2    | c        |
| mRA24 79  | 4-30-4 | 5-5  | 3  | 5  | GHTAMVLGNWFDP      | 13     | 3-15 | 2  | QQYNNWPPYT  | 10     | +          | -     | -        |
| mRA24 80  | 4-30-4 | 1-26 | 3  | 4  | ETIVGATRYFDY       | 12     | 3-11 | 1  | QQRSNWPPT   | 9      | -          | -     | -        |
| mRA24 95  | 4-59   | 2-2  | 3  | 3  | GVPAAHDAFDI        | 11     | 1-39 | 1  | QQSYSTPWT   | 9      | -          | -     | -        |
| mRA24 96  | 3-30-3 | 6-19 | 1  | 4  | DMDQWLVRGGEAFDY    | 15     | 1-39 | 1  | QQSYSTPVT   | 9      | -          | +     | -        |
|           | VH     | D    | RF | JH | CDR3 (aa)          | Length | Vλ   | Jλ | CDR3 (aa)   | Length | Poly       | HEp-2 | Staining |
| mRA24 47λ |        |      |    |    | see kappa          |        | 3-21 | 3  | QVWDSSSDHWV | 11     | -          | -     | -        |
| mRA24 74  | 4-59   | 4-23 | 2  | 5  | GYGGNWFDP          | 9      | 3-21 | 2  | QVWDSSSDHWV | 11     | -          | -     | -        |
| mRA24 91  | 3-9    | 3-3  | 2  | 4  | VGRLTDFWSGYD       | 13     | 7-46 | 3  | LLSYSGARLWV | 11     | +2         | +     | -        |
|           | VH     | D    | RF | JH | CDR3 (aa)          | Length |      |    |             |        |            |       |          |
| mRA24 21  | 3-30-3 | 5-5  | 1  | 4  | DELWLNIFYDY        | 10     |      |    |             |        |            |       |          |
| mRA24 68  | 3-33   | 3-22 | 2  | 3  | DNLYYYDSSGEDDAFDI  | 17     |      |    |             |        |            |       |          |

RF, reading frame; #, antibody failed to be expressed

-, non-reactive; +, reactive; +2, highly reactive

c, diffuse cytoplasmic staining; A, actin staining; G, Golgi staining; M, mitochondria staining; MS, mitotic spindle staining; N, nuclear staining; F, cytoplasmic fibers

Supplemental Table 45 Repertoire and reactivity of antibodies from mature naïve B cells of rheumatoid arthritis patient 30

| Ig        | HEAVY |             |        |    |                         | LIGHT  |       |    |              |        | REACTIVITY |       |          |
|-----------|-------|-------------|--------|----|-------------------------|--------|-------|----|--------------|--------|------------|-------|----------|
|           | VH    | D           | RF     | JH | CDR3 (aa)               | Length | Vκ    | Jκ | CDR3 (aa)    | Length | Poly       | HEp-2 | Staining |
| mRA30 01  | 3-23  | 3-9         | 2      | 6  | EAYDILGTPLGFYYGMDV      | 19     | 1-39  | 4  | QQSYSTPALT   | 10     | +          | +     | -        |
| mRA30 07  | 1-24  | 4-17        | 2      | 6  | GLYGDYPNYYYYGMDV        | 16     | 3-20  | 1  | QQYGSSPR     | 8      | -          | -     | -        |
| mRA30 11  | 3-15  | 2-8         | 2      | 5  | TWRDCTGGVCYKVKGGGFDP    | 21     | 1-39  | 2  | QQSYSTLGYT   | 10     | -          | +     | -        |
| mRA30 14  | 3-7   | 2-2         | 2      | 6  | DDRYCSSTSCYGAGARYYYGMDV | 24     | 2-28  | 5  | MQALQTPT     | 8      | -          | -     | -        |
| mRA30 16  | 3-7   | 3-9         | 2      | 6  | DEPLYDILTDGYYGMDV       | 19     | 2D-29 | 2  | MQSIQLPPYT   | 10     | -          | -     | -        |
| mRA30 17  | 1-2   | 1-1         | 2      | 2  | DRGNWNPGDWYFDL          | 14     | 3-20  | 4  | QQYGSSPLT    | 9      | -          | +     | -        |
| mRA30 18  | 3-30  | 6-13        | 2      | 6  | DGGSSRGSYYYYMDV         | 16     | 3-20  | 2  | QQYGSSRYT    | 9      | -          | +     | -        |
| mRA30 19  | 4-34  | 4-17        | 2      | 6  | NSVDEPDYGDWLSYYYGMDV    | 20     | 3-20  | 1  | QQYGSSPWT    | 9      | -          | +     | -        |
| mRA30 21  | 3-73  | 5-24        | 3      | 4  | LEMATINY                | 8      | 3-15  | 4  | QQYNNWPPVT   | 10     | -          | -     | -        |
| mRA30 23κ |       |             |        |    | see lambda              |        | 1-5   | 1  | QQYNSYPWT    | 9      | -          | -     | -        |
| mRA30 24  | 4-61  | 1-1         | 1      | 5  | RMVQLERPYPDP            | 12     | 1-39  | 1  | QQSYSTLWT    | 9      | -          | -     | -        |
| mRA30 34  | 3-21  | /           | /      | 4  | DWTLSFDY                | 8      | 1-39  | 4  | QQSYSTPLT    | 9      | -          | -     | -        |
| mRA30 36  | 3-30  | 6-13        | 2      | 6  | PRSSWYDYYYGMDV          | 14     | 1-33  | 3  | QQYDNLVPT    | 9      | -          | -     | -        |
| mRA30 43  | 1-2   | /           | /      | 3  | PFMDDAFDI               | 9      | 3-15  | 5  | QQYNNWPPIT   | 10     | -          | -     | -        |
| mRA30 48  | 3-66  | 3-16        | 2      | 6  | GVWGNFPYYYYGMDV         | 15     | 3-20  | 2  | QQYGSSPPYT   | 10     | +          | +     | -        |
| mRA30 47  |       |             |        |    |                         |        | 1-8   | 1  | QQYYSFPWT    | 9      |            |       |          |
|           | VH    | D           | RF     | JH | CDR3 (aa)               | Length | Vλ    | Jλ | CDR3 (aa)    | Length | Poly       | HEp-2 | Staining |
| mRA30 06  | 3-33  | /           | /      | 3  | GAGPEYAFDI              | 10     | 2-23  | 3  | CSYAGSSTCWV  | 11     | -          | -     | -        |
| mRA30 13  | 3-30  | 2-2         | 1      | 4  | DLGRGQPLLYPDY           | 13     | 1-47  | 3  | AAWDDSLSGWV  | 11     | -          | -     | MS       |
| mRA30 20  | 3-21  | /           | /      | 4  | DWTLSFDY                | 8      | 3-1   | 2  | QAWDSSTVV    | 9      | -          | +     | -        |
| mRA30 23λ | 3-30  | 4-17        | 3      | 4  | LPLTVTTPDPFDY           | 13     | 3-25  | 7  | QSADSSGTRAV  | 11     | +          | +     | -        |
| mRA30 33  | 1-18  | 3-9         | 2      | 6  | EGLNYYDILTGYYHMDV       | 17     | 1-40  | 2  | QSYDSSLGSHVV | 13     | +          | +     | -        |
| mRA30 38  | 3-7   | /           | /      | 4  | GHYMDY                  | 6      | 2-14  | 2  | SSYTSSTLV    | 10     | -          | -     | -        |
| mRA30 42  | 3-30  | 2-15        | 2      | 6  | DLVPRGYCSGSGSRLYYYYGMDV | 24     | 1-51  | 2  | GTWDSSLSAGV  | 11     | +          | -     | -        |
| mRA30 45  | 5-a   | 3-10        | 2      | 5  | VVLYYGGSGFSRSDGNWFDP    | 21     | 1-44  | 3  | AAWDDSLNGWV  | 11     | -          | -     | -        |
| mRA30 46  | 4-31  | 6-13        | 2      | 4  | ESFREGSGNPYSSSWYFDY     | 20     | 3-21  | 3  | QVWDSSSDQRV  | 11     | -          | +     | -        |
| mRA30 12  |       |             |        |    |                         |        | 3-21  | 2  | QVWDSSSDHVV  | 11     |            |       |          |
| mRA30 22  |       |             |        |    |                         |        | 2-11  | 3  | CSYAGSYTPFVW | 12     |            |       |          |
|           | VH    | D           | RF     | JH | CDR3 (aa)               | Length |       |    |              |        |            |       |          |
| mRA30 31  | 3-74  | 4-17<br>6-6 | 2<br>1 | 4  | EGDYREQLAVADY           | 13     |       |    |              |        |            |       |          |
| mRA30 37  | 3-21  | 5-12        | 3      | 4  | GVRGIVATIPGLRY          | 14     |       |    |              |        |            |       |          |

RF, reading frame; #, antibody failed to be expressed

-, non-reactive; +, reactive; +2, highly reactive

c, diffuse cytoplasmic staining; A, actin staining; G, Golgi staining; M, mitochondria staining; MS, mitotic spindle staining; N, nuclear staining; F, cytoplasmic fibers

Supplemental Table 46 Repertoire and reactivity of antibodies from mature naïve B cells of rheumatoid arthritis patient 33

| Ig         | HEAVY |      |    |    | CDR3 (aa)              | Length | LIGHT |    |               | CDR3 (aa) | Length | REACTIVITY |          |  |
|------------|-------|------|----|----|------------------------|--------|-------|----|---------------|-----------|--------|------------|----------|--|
|            | VH    | D    | RF | JH |                        |        | Vk    | Jk | Poly          |           |        | HEp-2      | Staining |  |
| mRA33 02   | 3-23  | 3-16 | 1  | 4  | AARERLGELSLGLLDY       | 17     | 1-5   | 1  | QQYNSYPWT     | 9         | +      | +          | -        |  |
| mRA33 05#  | 1-18  | 3-3  | 2  | 5  | LNDFWTSWPKRGGRGIDP     | 18     | 1-5   | 4  | QQYNSYLP      | 9         |        |            |          |  |
| mRA33 07   | 3-48  | 6-13 | 3  | 6  | DEAAAGTYYYYYGMDV       | 16     | 3-20  | 1  | QQYSSSPWT     | 9         | -      | -          | -        |  |
| mRA33 08#  | 1-69  | 5-24 | 3  | 4  | DGGSEMATDGPST          | 13     | 1-5   | 1  | QQYNSYSWT     | 9         |        |            |          |  |
| mRA33 17   | 3-30  | /    | /  | 5  | DPYFSSMS               | 7      | 3-11  | 2  | QQRSNWPYT     | 9         | -      | -          | -        |  |
| mRA33 18#  | 4-59  | 3-3  | 3  | 6  | DRLRLFSGMDV            | 11     | 1-5   | 1  | QQYKT         | 5         |        |            |          |  |
| mRA33 25   | 4-39  | 1-26 | 2  | 6  | RIGSYYYGMDV            | 12     | 2-28  | 2  | MQALQTPQT     | 9         | +      | +          | F        |  |
| mRA33 32   | 3-23  | /    | /  | 5  | VGWNQRSPLDWFDP         | 14     | 3-15  | 1  | QQYNNWPQT     | 9         | -      | -          | -        |  |
| mRA33 36   | 3-23  | /    | /  | 3  | AVVIYDAFDI             | 10     | 2-24  | 4  | MQATQPLT      | 9         | -      | -          | -        |  |
| mRA33 37#  | 3-15  | 3-10 | 1  | 4  | TGVLWFGELFN            | 12     | 2-28  | 2  | MQALQTPYT     | 9         |        |            |          |  |
| mRA33 38   | 4-34  | 3-3  | 2  | 3  | AGQDYDFWSGYRSAGAFDI    | 20     | 1-39  | 4  | QQSYSTPLT     | 9         | +2     | +          | -        |  |
| mRA33 43   | 1-18  | /    | /  | 4  | SRGY                   | 4      | 2-30  | 2  | MQGTHWPYT     | 9         | -      | +          | -        |  |
| mRA33 44   | 4-59  | 3-9  | 1  | 3  | VVETRLRYFDWQGMAFDI     | 18     | 1-33  | 3  | QQYDNLPLFT    | 10        | +      | +          | -        |  |
| mRA33 45   | 1-3   | 4-17 | 3  | 6  | LTTVTPIRTPYYYYYGMDV    | 19     | 1-9   | 3  | QQLNSYPQT     | 9         | +2     | +          | -        |  |
| mRA33 103  | 3-23  | 2-15 | 3  | 4  | ESRYVVVAATHFDY         | 15     | 1-39  | 1  | QQSYSTPRT     | 9         | +      | +          | F        |  |
| mRA33 104  | 4-34  | 1-7  | 2  | 4  | GTAYNNWNSVSGSHFDY      | 16     | 1-5   | 5  | QQYNSYSPIT    | 10        | -      | -          | -        |  |
| mRA33 108# | 3-48  | /    | /  | 4  | ASFSRQPGEYD            | 12     | 1D-8  | 2  | QQYYSFPLT     | 9         |        |            |          |  |
| mRA33 109  | 3-23  | 5-5  | 2  | 6  | GDVAGYSYGYYYGMDV       | 17     | 1-17  | 1  | LQHNSYPPT     | 9         | +      | -          | -        |  |
| mRA33 110  | 3-23  | 6-19 | 2  | 3  | STLREKYSGGWYTNAFDI     | 18     | 3-20  | 4  | QQYSSSPRALT   | 11        | +      | -          | -        |  |
| mRA33 112  | 3-30  | 2-15 | 2  | 6  | DLNYCSGGSCYEYYYYGMDV   | 20     | 1-12  | 4  | QQANSFPFT     | 9         | -      | -          | -        |  |
| mRA33 113  | 4-39  | 4-4  | 2  | 4  | QHRFPVYSNPLLAY         | 14     | 3-15  | 2  | QQYNNWPSCT    | 10        | +2     | +2         | -        |  |
| mRA33 115# | 3-23  | 3-22 | 3  | 4  | EAFDITMIVSGYFDY        | 16     | 4-1   | 1  | QQYSTPRT      | 9         |        |            |          |  |
| mRA33 116  | 5-51  | 4-4  | 3  | 4  | LGTTALDY               | 8      | 3-20  | 1  | QQYSSPET      | 9         | -      | -          | -        |  |
| mRA33 117  | 3-23  | /    | /  | 3  | DGPIDGSAREAFDY         | 14     | 1-17  | 4  | LQHNSYPT      | 8         | -      | -          | -        |  |
| mRA33 120  | 3-53  | 5-12 | 3  | 2  | SRVATIGRWYFDL          | 13     | 1-33  | 2  | QQYDNLTY      | 8         | +      | +          | -        |  |
| mRA33 121  | 3-23  | /    | /  | 6  | VEAAKLYYYYYGMDV        | 15     | 1-6   | 1  | LQDYNYPRT     | 9         | +      | +          | N+c      |  |
| mRA33 123  | 3-48  | 3-10 | 3  | 3  | DTPDLITMVRGEDAFDI      | 17     | 3-11  | 2  | QQRSNWLYT     | 9         | +      | +          | -        |  |
| mRA33 125  | 3-15  | 3-10 | 1  | 4  | APVLLWFGELLSGYFDY      | 17     | 3-15  | 1  | QQYNNWPKT     | 9         | +      | +2         | -        |  |
| mRA33 126  | 3-30  | 2-21 | 2  | 2  | ESCGDCYWFYFDL          | 13     | 2-28  | 5  | MQALQTSIT     | 9         | -      | -          | -        |  |
| mRA33 131  | 5-a   | 2-2  | 3  | 6  | ANIVVPAATQNYYYYYGMDV   | 20     | 1-5   | 1  | QQYNSYSPWT    | 10        | +      | +          | -        |  |
|            | VH    | D    | RF | JH | CDR3 (aa)              | Length | Vk    | Jk | CDR3 (aa)     | Length    | Poly   | HEp-2      | Staining |  |
| mRA33 09   | 4-59  | 6-19 | 3  | 3  | TIAVADAGDAFDI          | 13     | 3-25  | 2  | QSADSSGYVV    | 11        | -      | -          | -        |  |
| mRA33 12   | 1-18  | 4-17 | 2  | 4  | GDYGDFFDY              | 9      | 2-14  | 2  | SSYTSSTLV     | 10        | -      | -          | -        |  |
| mRA33 13   | 4-59  | 3-22 | 2  | 4  | TKNPGAYYDSSGYSSGGFDY   | 21     | 1-47  | 3  | AAWDDSLSGWV   | 11        | +2     | +2         | -        |  |
| mRA33 14   | 1-3   | 2-2  | 1  | 6  | ADQLLFGGYYGMDV         | 14     | 3-25  | 3  | QSADSSGAV     | 9         | +      | +          | -        |  |
| mRA33 16   | 1-69  | 3-22 | 2  | 4  | EGLSYDSSGCGCFDY        | 18     | 2-14  | 2  | SSYTSSTV      | 10        | +      | +          | -        |  |
| mRA33 22   | 3-7   | 6-19 | 1  | 5  | LQWPEHDSWFDP           | 12     | 3-25  | 2  | QSADSSGTHVV   | 11        | -      | -          | -        |  |
| mRA33 24   | 3-23  | 6-13 | 2  | 6  | DVSGYSSSWIYYYYGMDV     | 18     | 1-51  | 1  | GTWDSLSAYV    | 11        | -      | -          | -        |  |
| mRA33 30   | 3-23  | 3-3  | 2  | 4  | DRFGDFWSGYPTYFDY       | 16     | 3-1   | 1  | QAWDSSTFYV    | 10        | -      | -          | -        |  |
| mRA33 41#  | 3-48  | 3-10 | 3  | 5  | HMVGRVIRQYNWFDP        | 15     | 9-49  | 3  | GADHGSGSNFVEV | 13        |        |            |          |  |
| mRA33 101  | 3-30  | 3-22 | 2  | 4  | GGEKYYDSTVDY           | 13     | 2-8   | 1  | SSYAGSNFV     | 10        | -      | -          | -        |  |
| mRA33 102  | 4-4   | 2-15 | 3  | 6  | DLAIVTRDYGGMDV         | 15     | 1-44  | 3  | AAWDDSLNGWV   | 11        | -      | -          | -        |  |
| mRA33 105  | 3-15  | 3-3  | 3  | 6  | SITIFGESDYGGMDV        | 18     | 4-60  | 2  | ETWDSNAV      | 9         | -      | -          | -        |  |
| mRA33 106  | 5-51  | 6-6  | 2  | 5  | YSSSRENNWFDP           | 13     | 3-25  | 2  | QSADSSGTNVV   | 11        | -      | -          | -        |  |
| mRA33 107  | 3-15  | /    | /  | 6  | GVGRYYYYGMDV           | 12     | 3-1   | 3  | QAWDSSTAGV    | 10        | -      | -          | -        |  |
| mRA33 111  | 3-23  | 2-8  | 3  | 4  | DRDGLVMVAPPDY          | 14     | 2-23  | 1  | CSYAGSSTLYV   | 11        | +      | -          | -        |  |
| mRA33 119  | 3-23  | 6-19 | 3  | 4  | EERILTVAGTNYFDY        | 16     | 1-40  | 2  | QSYDSSLGSGV   | 11        | -      | -          | -        |  |
| mRA33 122  | 3-30  | 2-2  | 2  | 5  | GGIAYCSSTCLYNWFDP      | 18     | 1-51  | 3  | GTWDSLSAGGV   | 12        | -      | -          | F        |  |
| mRA33 127  | 3-33  | 2-2  | 2  | 6  | DDRYCSSTSCYTDGYYYYGMDV | 22     | 3-1   | 2  | QAWDSSTAIV    | 10        | -      | -          | -        |  |
| mRA33 129  | 3-15  | 3-22 | 2  | 4  | EAYDSSGYFDY            | 12     | 2-14  | 2  | SSYTSSTPV     | 10        | -      | -          | -        |  |
| mRA33 130  | 3-23  | 2-15 | 2  | 4  | VEAHCSSGSCYSGGDY       | 16     | 3-25  | 3  | QSADSSGTWV    | 10        | -      | -          | -        |  |
| mRA33 132# | 1-69  | 3-22 | 3  | 6  | SIVVPIPYYYYYGMDV       | 16     | 9-49  | 2  | GADHGSGSNFVVV | 13        |        |            |          |  |
| mRA33 134  | 1-69  | 6-19 | 3  | 4  | SVISGIAVAGTVPYFDY      | 17     | 3-1   | 2  | QAWDSSTV      | 9         | +      | +          | -        |  |
| mRA33 135  | 4-31  | /    | /  | 4  | GRRWLGYFDY             | 10     | 2-11  | 1  | CSYAGSYQV     | 10        | +2     | +          | N+c      |  |
| mRA33 136  | 1-69  | 2-2  | 3  | 3  | VGPAAHDAFDI            | 11     | 2-11  | 1  | CSYAGSYFYV    | 10        | +      | +          | -        |  |
| mRA33 137  | 3-21  | 6-19 | 1  | 4  | GRQWLTFDY              | 9      | 1-51  | 2  | GTWDSLSAVV    | 11        | -      | +          | N+c      |  |
| mRA33 01   |       |      |    |    |                        |        | 4-69  | 1  | QTWGTGIHV     | 9         |        |            |          |  |
|            | VH    | D    | RF | JH | CDR3 (aa)              | Length |       |    |               |           |        |            |          |  |
| mRA33 03   | 3-23  | 3-3  | 2  | 4  | MDRANSGYFDY            | 11     |       |    |               |           |        |            |          |  |
| mRA33 04   | 4-4   | 3-10 | 2  | 4  | VGYSGSPDY              | 10     |       |    |               |           |        |            |          |  |
| mRA33 09   | 4-59  | 6-19 | 3  | 3  | TIAVADAGDAFDI          | 13     |       |    |               |           |        |            |          |  |
| mRA33 11   | 3-7   | 3-22 | 2  | 4  | TLGYDSSGYSFPPYFDY      | 19     |       |    |               |           |        |            |          |  |
| mRA33 21   | 1-69  | 1-26 | 2  | 5  | DHWGSSSPERRNWFDP       | 15     |       |    |               |           |        |            |          |  |
| mRA33 26   | 3-23  | 3-10 | 1  | 4  | YRFGEFDY               | 8      |       |    |               |           |        |            |          |  |
| mRA33 40   | 3-23  | 4-17 | 2  | 4  | SPDYGDYRVNFDY          | 13     |       |    |               |           |        |            |          |  |

RF, reading frame; #, antibody failed to be expressed

-, non-reactive; +, reactive; +2, highly reactive

c, diffuse cytoplasmic staining; A, actin staining; G, Golgi staining; M, mitochondria staining; MS, mitotic spindle staining; N, nuclear staining; F, cytoplasmic fibers

**Supplemental Table 47: Healthy donors enrolled for gene array experiments**

|               | <b>Genotype</b> | <b>Age</b> | <b>Gender</b> |
|---------------|-----------------|------------|---------------|
| <b>HD17</b>   | C/C             | 28         | female        |
| <b>HD07</b>   | C/C             | 48         | female        |
| <b>HD16</b>   | C/C             | 29         | male          |
| <b>HD10</b>   | C/C             | 36         | male          |
| <b>HD06</b>   | C/C             | 60         | female        |
| <b>HD1400</b> | C/C             | unknown    | unknown       |
| <b>HD1424</b> | C/C             | unknown    | unknown       |
| <b>HD1425</b> | C/C             | unknown    | unknown       |
| <br>          |                 |            |               |
| <b>HD750</b>  | C/T             | 58         | male          |
| <b>HD12</b>   | C/T             | 30         | female        |
| <b>HD13</b>   | C/T             | 34         | male          |
| <b>HD862</b>  | C/T             | 53         | male          |
| <b>HD-CT2</b> | C/T             | unknown    | unknown       |
| <b>HD535</b>  | T/T             | 52         | female        |
| <b>HD837</b>  | T/T             | 49         | female        |
| <b>HD138</b>  | T/T             | 45         | female        |

Supplemental Table 48: fold change values and p-values for each probe shown on Figure 5

| Gene Symbol | Fold Change | p value |
|-------------|-------------|---------|
| IGHM        | 1.886       | 0.0443  |
|             | 1.405       | 0.0221  |
|             | 1.61        | 0.00336 |
| CD79A       | 1.687       | 0.0263  |
| CD19        | 1.681       | 0.0042  |
| CD22        | 1.675       | 0.0151  |
|             | 1.581       | 0.0149  |
| BLK         | 3.115       | 0.0153  |
| FYN         | 2.14        | 0.0137  |
|             | 1.947       | 0.0363  |
| CARD11      | 2.677       | 0.0296  |
| MALT1       | 1.673       | 0.00536 |
|             | 1.522       | 0.00887 |
| MAP4K1      | 3.254       | 0.0127  |
|             | 2.891       | 0.0138  |
|             | 2.773       | 0.0141  |
| MAP4K2      | 2.377       | 0.046   |
| PTPN2       | 3.107       | 0.046   |
|             | 1.852       | 0.00457 |
| CALM2       | 2.407       | 0.0352  |
| SLAMF1      | 0.337       | 0.0274  |
| SLAMF6      | 0.269       | n.s     |
| ICOSL       | 38.19       | n.s     |
|             | 13.09       | 0.0409  |
|             | 4.182       | 0.047   |
| CD40        | 1.901       | 0.0357  |
|             | 1.727       | 0.0322  |
| TRAF1       | 10.76       | 0.0279  |
|             | 7.083       | n.s     |
| TRAF2       | 6.139       | 0.0157  |
| TRAF4       | 3.653       | n.s     |
| TRAF6       | 2.52        | n.s     |
| TRIP        | 2.352       | 0.0437  |
| TANK        | 2.752       | 0.0357  |
| MYD88       | 2.382       | 0.0371  |
| IRAK1       | 2.364       | 0.046   |
| IRAK3       | 7.194       | n.s     |
| NFKB1       | 3.24        | 0.0186  |
| RELB        | 4.566       | 0.0452  |
| IKBKB       | 1.604       | 0.0134  |
| IRF3        | 2.17        | 0.0103  |
| IRF5        | 3.699       | 0.0196  |
| IRF7        | 4.769       | 0.0459  |
| IL4R        | 1.72        | 0.00545 |
| IL13RA1     | 2.455       | 0.0368  |
| IL21R       | 5.373       | 0.00669 |
| IL11RA      | 1.925       | 0.00842 |
|             | 1.822       | 0.0161  |
| IL17R       | 3.345       | 0.0363  |
| BCL2        | 6.368       | 0.0415  |
|             | 5.159       | n.s     |
| DICER1      | 0.195       | 0.00785 |
|             | 0.231       | 0.0156  |

Supplemental Table 49: Fold Change values and p-values for each probe shown on Supplemental Figure 4

| Gene Symbol | Fold Change | p-value  |
|-------------|-------------|----------|
| HLA-A       | 1.675       | 0.0117   |
|             | 1.397       | 0.0421   |
| HLA-B       | 1.564       | 0.0357   |
| HLA-C       | 1.772       | 0.0357   |
|             | 1.701       | 0.0209   |
|             | 1.678       | 0.0274   |
| HLA-DMB     | 1.332       | 0.0357   |
| HLA-E       | 1.687       | 0.0274   |
|             | 1.452       | 0.0357   |
|             | 1.251       | 0.0446   |
| HLA-F       | 2.266       | ns       |
|             | 1.756       | 0.0157   |
|             | 1.566       | 0.00632  |
|             | 1.317       | 0.0362   |
| TAP1        | 2.697       | 0.0157   |
| ZAP-70      | 3.011       | 0.0273   |
|             | 2.489       | n.s.     |
| TRADD       | 2.27        | 0.0209   |
|             | 2.439       | 0.0209   |
| TRAF5       | 0.654       | 0.0357   |
| PTPN11      | 0.749       | 0.0274   |
| NLK         | 0.198       | ns       |
|             | 0.349       | 0.0274   |
|             | 0.43        | 0.046    |
| CASP2       | 0.617       | 0.0274   |
| SMAD5       | 0.157       | n.s      |
|             | 0.228       | 0.0263   |
|             | 0.33        | 0.0178   |
| CALM1       | 0.359       | 0.00376  |
|             | 0.581       | 0.0145   |
| CAMK1       | 0.0588      | 0.0447   |
| CAMK2D      | 0.442       | 0.046    |
|             | 0.516       | 0.0117   |
| CASK        | 0.539       | 0.011    |
| CREB1       | 0.609       | 0.0348   |
| BCL11A      | 0.451       | 0.0102   |
|             | 0.465       | 0.0307   |
|             | 0.582       | 0.00552  |
| EBF         | 0.466       | 0.00807  |
|             | 0.557       | 0.0322   |
| PBX2        | 0.418       | 0.0266   |
|             | 0.485       | 0.0116   |
| SMARCA4     | 4.093       | 0.0225   |
|             | 2.114       | 0.0419   |
|             | 1.89        | 0.00706  |
|             | 1.874       | 0.0392   |
| ELL2        | 4.383       | 0.045    |
|             | 3.435       | ns       |
| NFATC1      | 1.858       | 0.00865  |
| RUNX3       | 3.352       | 0.0357   |
|             | 2.668       | 0.0274   |
| SOX4        | 1.935       | 0.0209   |
| ZNF145      | 6.838       | 0.000778 |
|             | 4.642       | ns       |
|             | 2.695       | ns       |

| Gene Symbol | Fold Change | p-value  |
|-------------|-------------|----------|
| ZYG         | 3.75        | 0.00113  |
|             | 2.752       | 0.00632  |
| TLE1        | 6.369       | 0.00328  |
|             | 3.362       | 0.00865  |
|             | 3.148       | 0.0117   |
| TLE3        | 5.995       | 0.00328  |
|             | 5.73        | 0.00232  |
| POLA2       | 1.904       | 0.000778 |
| POLD2       | 2.204       | 0.00865  |
| POLE4       | 2.001       | 0.0157   |
|             | 1.914       | 0.0209   |
| POLE        | 2.355       | 0.00328  |
| POLG        | 2.406       | 0.046    |
| POLI        | 1.676       | 0.0357   |
| POLR1C      | 4.143       | 0.046    |
|             | 2.668       | 0.046    |
| POLR2A      | 4.703       | 0.0274   |
|             | 3.114       | ns       |
|             | 1.931       | ns       |
|             | 1.823       | ns       |
| POLR3E      | 1.208       | ns       |
|             | 0.501       | 0.0274   |
| POLH        | 0.501       | 0.0274   |
| POLK        | 0.483       | 0.0157   |
| IL23A       | 0.59        | 0.0179   |
| TGFBR2      | 2.164       | 0.0274   |
| TGFB1       | 3.847       | 0.0323   |
| CD24        | 1.96        | 0.0274   |
| CD44        | 5.78        | ns       |
|             | 2.633       | 0.046    |
|             | 2.503       | ns       |
| ITGA4       | 0.421       | 0.015    |
| ICAM1       | 19.28       | n.s      |
|             | 2.625       | n.s      |
| ICAM2       | 2.057       | 0.00219  |
|             | 1.729       | n.s      |
| ICAM3       | 2.453       | 0.0179   |
| TNFRSF19L   | 3.744       | 0.0274   |
| IGBP1       | 1.373       | 0.046    |
| PRKAB1      | 2.603       | 0.0274   |
| PTK2B       | 1.788       | 0.0117   |
| RASA4       | 2.04        | 0.00232  |
| TAF6        | 1.864       | 0.0117   |
| IFNAR1      | 0.288       | n.s      |
| IFNAR2      | 0.337       | 0.017    |
| JAK1        | 1.612       | 0.0389   |
|             | 1.583       | 0.0322   |
| JAK3        | 0.744       | 0.0182   |
| STAT1       | 3.968       | 0.00865  |
|             | 2.329       | n.s      |
| IFITM1      | 4.938       | n.s      |
|             | 3.603       | n.s      |
| IFIT1       | 54.21       | n.s      |
| IFIT2       | 3.69        | n.s      |
| IFIT4       | 9.714       | n.s      |

**Supplemental Table 50: Healthy donors enrolled for real-time PCR experiments**

|                 | <b>Genotype</b> | <b>Age</b> | <b>Gender</b> |
|-----------------|-----------------|------------|---------------|
| <b>HD10</b>     | C/C             | 36         | male          |
| <b>HD07</b>     | C/C             | 48         | female        |
| <b>HD06</b>     | C/C             | 60         | female        |
| <b>HD1424</b>   | C/C             | unknown    | unknown       |
| <b>HD2425</b>   | C/C             | unknown    | unknown       |
| <b>HD1422</b>   | C/C             | unknown    | unknown       |
| <b>HD1427</b>   | C/C             | unknown    | unknown       |
| <b>HD1432</b>   | C/C             | unknown    | unknown       |
| <b>HD1433</b>   | C/C             | unknown    | unknown       |
| <b>HD1434</b>   | C/C             | unknown    | unknown       |
| <b>HD012809</b> | C/C             | unknown    | unknown       |
| <b>HD1411</b>   | C/C             | unknown    | unknown       |
| <b>HD21</b>     | C/C             | 47         | female        |
| <b>HD22</b>     | C/C             | 47         | female        |
| <b>HD23</b>     | C/C             | 49         | female        |
| <b>HD24</b>     | C/C             | 54         | female        |
| <b>HD25</b>     | C/C             | 29         | female        |
| <b>HD26</b>     | C/C             | 53         | female        |
| <b>HD528</b>    | C/C             | 22         | male          |
| <b>HDC1</b>     | C/C             | 24         | male          |
| <b>HDC3</b>     | C/C             | 63         | female        |
| <b>HDC4</b>     | C/C             | 28         | female        |
| <b>HDC5</b>     | C/C             | 56         | female        |
| <b>HDC6</b>     | C/C             | 32         | female        |
| <b>HDC7</b>     | C/C             | 26         | female        |
| <b>HDC8</b>     | C/C             | 28         | male          |
| <b>HDC9</b>     | C/C             | 44         | female        |
| <b>HD274</b>    | C/C             | unknown    | unknown       |
| <b>HD275</b>    | C/C             | unknown    | unknown       |
| <b>HD276</b>    | C/C             | unknown    | unknown       |
| <b>HDUK1</b>    | C/C             | 32         | female        |
| <b>HD13</b>     | C/T             | 34         | male          |
| <b>HD1421</b>   | C/T             | unknown    | unknown       |
| <b>HD1412</b>   | C/T             | unknown    | unknown       |
| <b>HD527</b>    | C/T             | 58         | male          |
| <b>HD530</b>    | C/T             | 59         | male          |
| <b>HD534</b>    | C/T             | 29         | male          |
| <b>HD535</b>    | T/T             | 52         | female        |
| <b>HDP2</b>     | C/T             | 46         | male          |
| <b>HDUK2</b>    | C/T             | 54         | female        |
| <b>HDP4</b>     | T/T             | 51         | female        |
| <b>HDP5</b>     | C/T             | 27         | female        |
| <b>HDP6</b>     | C/T             | 54         | female        |
| <b>HDP7</b>     | C/T             | 22         | female        |
| <b>HDP8</b>     | C/T             | 30         | female        |
| <b>HDP9</b>     | C/T             | 55         | female        |
| <b>HDP10</b>    | C/T             | 31         | male          |



Supplemental Table 51: T1D and T2D patients' characteristics

|                                      | T1D01                                             | T1D02                                                                 | T1D03                                             | T1D04                                                                 | T1D05                                                                              | T1D903                            | T1D929               | T1D430               | T2D01                                                  | T2D02                                        |
|--------------------------------------|---------------------------------------------------|-----------------------------------------------------------------------|---------------------------------------------------|-----------------------------------------------------------------------|------------------------------------------------------------------------------------|-----------------------------------|----------------------|----------------------|--------------------------------------------------------|----------------------------------------------|
| <b>Genotype</b>                      | C/C                                               | C/C                                                                   | C/C                                               | C/C                                                                   | C/C                                                                                | C/T                               | C/T                  | T/T                  | C/C                                                    | C/C                                          |
| <b>Age</b>                           | 4.4                                               | 5.5                                                                   | 30                                                | 6.7                                                                   | 14                                                                                 | 22                                | 40                   | 48                   | 17.5                                                   | 14                                           |
| <b>Gender</b>                        | M                                                 | M                                                                     | M                                                 | F                                                                     | F                                                                                  | M                                 | F                    | M                    | F                                                      | F                                            |
| <b>Age at presentation</b>           | 4                                                 | 5                                                                     | 15                                                | 6.6                                                                   | 9                                                                                  | 17                                | 12                   | 29                   | 14.7                                                   | 13.25                                        |
| <b>Clinical symptoms</b>             | T1D mellitus, diabetes keto-acidosis              | polyuria, polydipsia, hyperglycemia                                   | T1D mellitus, diabetes keto-acidosis              | glycosuria (286 mg/dL), hyperglycemia (232 mg/dL)                     | polyuria, polydipsia, hyperglycemia                                                | polyuria, polydipsia              | polyuria, polydipsia | polyuria, polydipsia | insulin resistance, overweight, irregular menstruation | overweight, metabolic syndrome, T2D mellitus |
| <b>Blood glucose</b>                 | unknown                                           | 322 mg/dL, 395 mg/dL                                                  | unknown                                           | 232 mg/dL                                                             | unknown                                                                            | unknown                           | 280 mg/dL            | unknown              | fasting:188 mg/dL ; 2hours: 278 mg/dL                  | unknown                                      |
| <b>Hemoglobin A1C</b>                | 10.60%                                            | 8.60%                                                                 | unknown                                           | 6.70%                                                                 | unknown                                                                            | unknown                           | unknown              | unknown              | 8.10%                                                  | unknown                                      |
| <b>GAD65</b>                         | >1 IU/mL                                          | Positive                                                              | unknown                                           | 12.75 IU/mL                                                           | unknown                                                                            | negative                          | Positive             | Positive             | -                                                      | -                                            |
| <b>ICA</b>                           | unknown                                           | Positive                                                              | unknown                                           | 40 GDJ units                                                          | unknown                                                                            | Positive                          | unknown              | unknown              | -                                                      | -                                            |
| <b>Thyroid peroxydase antibodies</b> | -                                                 | 3.5 IU/mL                                                             | unknown                                           | -                                                                     | +                                                                                  | unknown                           | unknown              | unknown              | -                                                      | -                                            |
| <b>Thyroglobulin antibodies</b>      | -                                                 | -                                                                     | unknown                                           | -                                                                     | +                                                                                  | unknown                           | unknown              | unknown              | -                                                      | -                                            |
| <b>Other antibodies</b>              | mild + 21 hydroxylase antibodies, anti-gliadin    | unknown                                                               | unknown                                           | unknown                                                               | - for celiac related antibodies and 21 hydroxylase antibodies, C peptide<0.5 ng/mL | unknown                           | unknown              | unknown              | unknown                                                | unknown                                      |
| <b>Treatment</b>                     | MSI of glargin, lispro insulin, then insulin pump | MSI of glargin, lispro insulin, then lispro insulin with insulin pump | MSI of glargin, lispro insulin, then insulin pump | MSI of glargin, lispro insulin, then lispro insulin with insulin pump | MSI of NPH and Regular insulin, then lispro insulin with insulin pump              | unknown                           | unknown              | unknown              | metformim                                              | insulin, then metformim                      |
| <b>Comorbidities</b>                 | -                                                 | Autoimmune hypothyroidism, MS                                         | -                                                 | -                                                                     | auto-immune hypothyroidism                                                         | hypothyroidism, Addison's disease | -                    | hypothyroidism       | -                                                      | -                                            |

GAD65: Glutamate acid decarboxylase, ICA: Islet-cell antibodies, MSI: multiple subcutaneous injections, MS: multiple sclerosis, NPH: Neutral Protamine Hagedorn insulin

Supplemental Table 52: RA patients' characteristics

|                                    | RA01                                           | RA02                           | RA03                               | RA04            | RA05                                   | RA06                                  | RA11                        | RA24                               | RA30                          | RA33                                                                                                                 |
|------------------------------------|------------------------------------------------|--------------------------------|------------------------------------|-----------------|----------------------------------------|---------------------------------------|-----------------------------|------------------------------------|-------------------------------|----------------------------------------------------------------------------------------------------------------------|
| <b>Genotype</b>                    | C/C                                            | C/C                            | C/C                                | C/C             | C/C                                    | C/C                                   | C/C                         | C/C                                | C/T                           | T/T                                                                                                                  |
| <b>Age</b>                         | 60                                             | 62                             | 62                                 | 36              | 30                                     | 64                                    | 46                          | 31                                 | 57                            | 46                                                                                                                   |
| <b>Gender</b>                      | F                                              | M                              | F                                  | F               | F                                      | F                                     | F                           | F                                  | F                             | F                                                                                                                    |
| <b>age RA onset</b>                | 47                                             | 60                             | 59                                 | 35              | 28                                     | 62                                    | 44                          | 31                                 | 46                            | 31                                                                                                                   |
| <b>Joints involved</b>             | Virtually all                                  | Knees, elbows, wrists, PIPs    | IP, MCP, wrists, elbows, neck, TMJ | Hands, knees    | L wrist, ankle                         | Shoulder, R hand, diffuse arthralgias | Wrists, hands, feet, ankles | Shoulders, wrists, fingers, knees  | Feet, hands                   | Shoulders, wrists, elbows, ankles, hands                                                                             |
| <b>Prior DMARDs/steroids</b>       | Intermittent steroids, plaquenil, methotrexate | None                           | Steroids, methotrexate             | None            | None                                   | None                                  | None                        | None                               | Sulfasalazine                 | Remicade, Imunran (prednisone, etanercept, hydroxychloroquine, infliximab, leflunomide, methotrexate, sulfasalazine) |
| <b>Months off DMARDs/steroids</b>  | 5                                              | n/a                            | 4                                  | n/a             | n/a                                    | n/a                                   | n/a                         | n/a                                | 0                             | N/A                                                                                                                  |
| <b>RF</b>                          | <20                                            | 848                            | 1110                               | 55              | 48                                     | 474                                   | 113                         | 172                                | 141                           | 89                                                                                                                   |
| <b>anti-CCP</b>                    | 32                                             | 88                             | 240                                | 63              | <20                                    | >250                                  | >250                        | >60                                | >60                           | 150                                                                                                                  |
| <b>X-ray erosions</b>              | +                                              | +                              | -                                  | -               | +                                      | -                                     | +                           | -                                  | -                             | -                                                                                                                    |
| <b>Comorbidities</b>               | Hypertension                                   | Anal fistula, cardiomegaly     | TB exposure                        | None            | Childhood seizures                     | Asthma                                | Peptic ulcer, depression    | None                               | Breast cancer stage 1, asthma | Guillain-Barre, Addison's disease, ankylosing spondylitis, anticardiolipin antibodies                                |
| <b>Family history (autoimmune)</b> | None                                           | Brother with arthritis (kind?) | None                               | Cousin with SLE | Father and mother with thyroid disease | Parents with arthritis (kind?)        | None                        | Mother with inflammatory arthritis | None                          | unknown                                                                                                              |

Patients were considered rheumatoid factor (RF) or anti-CCP positive when their antibody titer was >20. DMARDs: Disease-modifying anti-inflammatory drugs, CCP: cyclic citrullinated peptides, PIPs: proximal interphalangeal joints, IPs: interphalangeal joints, MCP: metacarpophalangeal joint, TMJ: temporomandibular joint, TB: tuberculosis bacillus.

**Supplemental Table 53 : list of primers used for real-time PCR**

| <b>gene</b>   | <b>sense primers</b>            | <b>antisense primers</b>          |
|---------------|---------------------------------|-----------------------------------|
| <b>Actin</b>  | GAAATC GTG CGT GAC ATT AAG GAG  | TGG AGT TGA AGG TAG TTT CGT GGA   |
| <b>CD40</b>   | ATG GTT CGT CTG CCT CTG CAG     | ATT CGC TTT CAC CGC AAG GAA G     |
| <b>SLAMF6</b> | AAG CTG TCC AGT TAC ACT CTG AG  | TCT GCA TCC TCC ACA GAG CAA G     |
| <b>CD19</b>   | GAC CAT GTC ATT CCA CCT GGA G   | GAA CAC AGG CAG AAG ATC AGA TAA G |
| <b>IRF5</b>   | GAC CAA GCT TTT CAG CCT GGA G   | GCA CCA CCT GTA CAG TAA TGA G     |
| <b>BCL2</b>   | ATT GAT GGG ATC GTT GCC TTA TG  | TTA ATA TCA GTC TAC TTC CTC TGT G |
| <b>BLK</b>    | CCT GAA GGT CAG CGC CCA AG      | T CTT CCT GTG ACG AGT GAC CTG     |
| <b>TRAF1</b>  | CTG TGC AGG CTG TCT CTC TGA G   | GTG ACC TCA TGC TCT TGC ACA G     |
| <b>TRAF2</b>  | CCT GCT GCG GAG CAG ACG TG      | GCT CAG TAG CAT GGC CAG GTG       |
| <b>MYD88</b>  | ACG ACG TGC TGC TGG AGC TG      | GCA TCG AAA CGC TCA GGC ATA TG    |
| <b>ICOSL</b>  | TGAACA TTG GCT GCT GCA TAG AG   | ACA GCC AGG ATG CTC CAC CTG       |
| <b>NFKB1</b>  | CGG CTT CAG AAT GGC AGA AGA TG  | GGT TGC TCT AAT ATT TGA AGG TAT G |
| <b>RELB</b>   | GCC ATT GCC TTT CAC GTA CCT G   | GCC GTT TGC TCT CGA TGC CAT G     |
| <b>DICER1</b> | TGG AAA GAA GAT ACA CAG CAG TTG | CAA TAA GCA GGT TGG TCT CAT GTG   |
